# Supplementary material for: Protein-RNA Complexes and Efficient Automatic Docking: Expanding RosettaDock Possibilities
Source: PubMed Central journal article supplement (PMC4182525; doi:10.1371/journal.pone.0108928), 2014-09-30

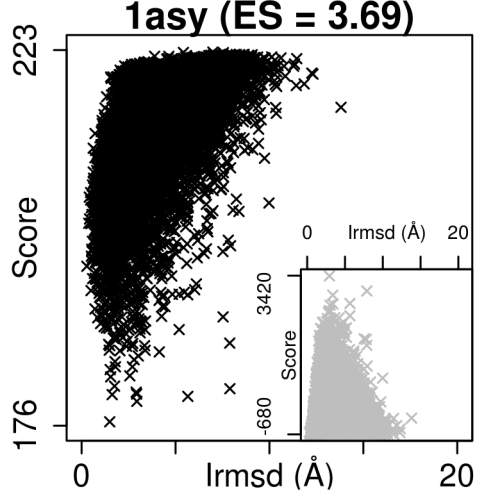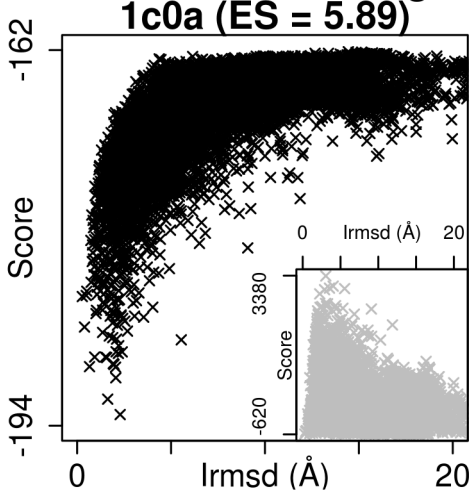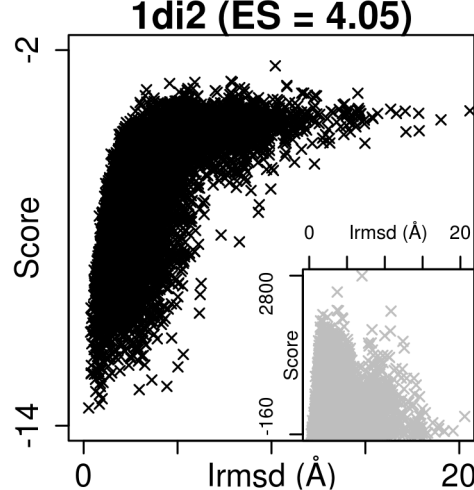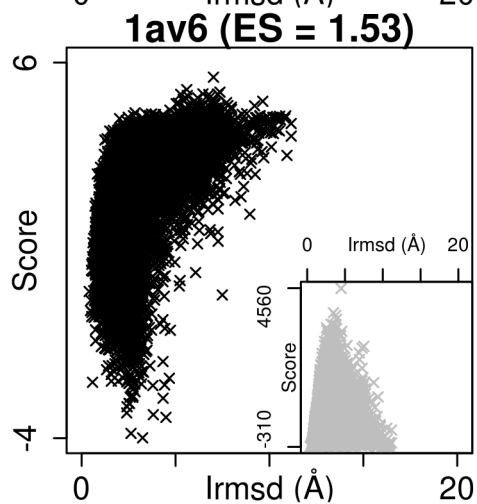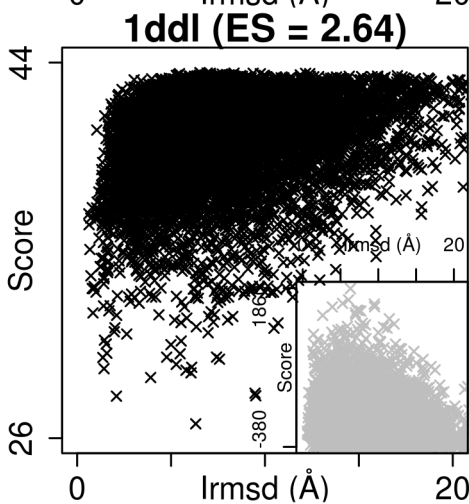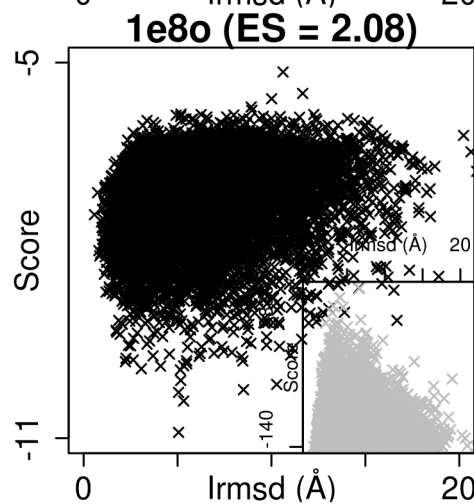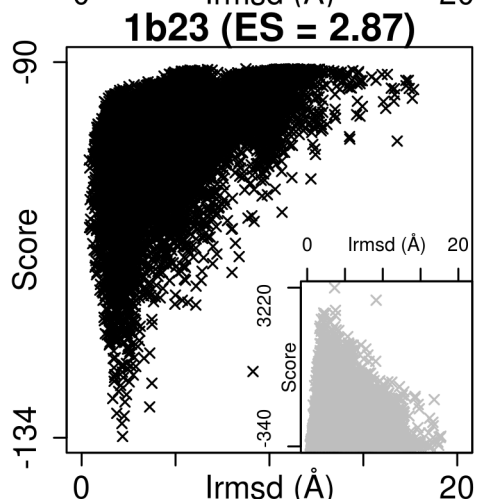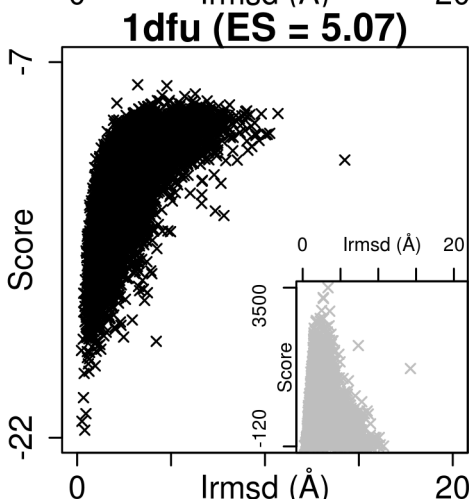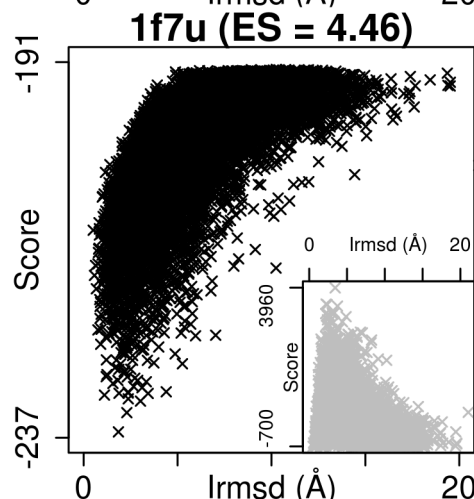

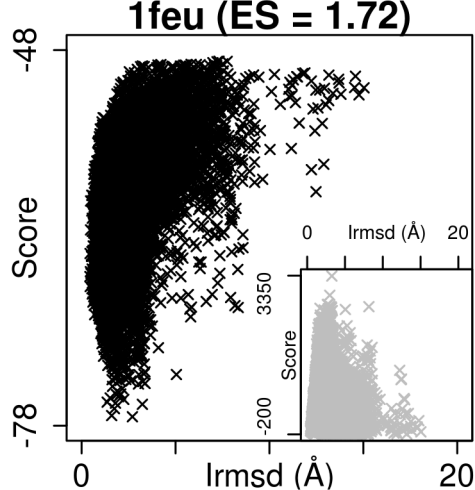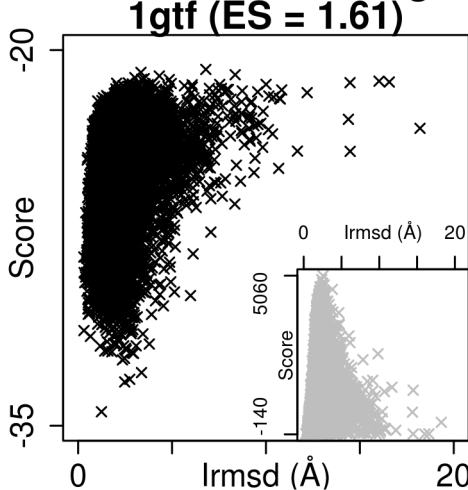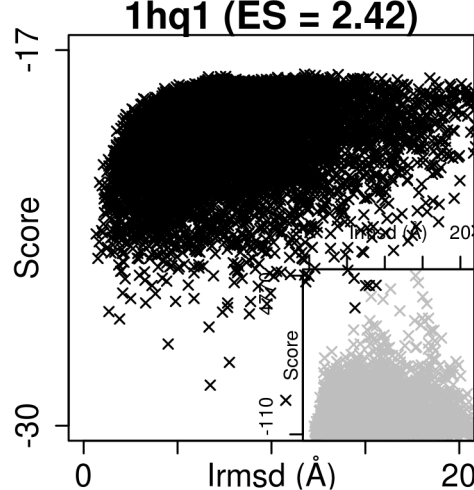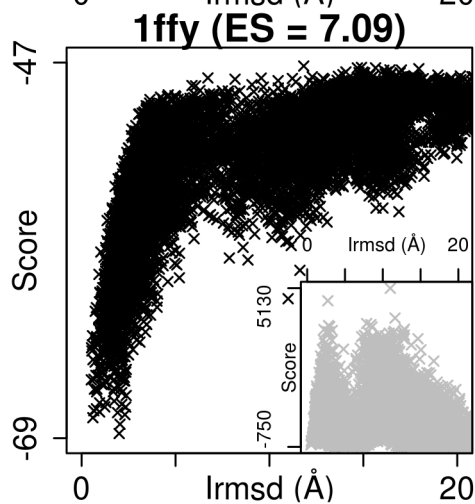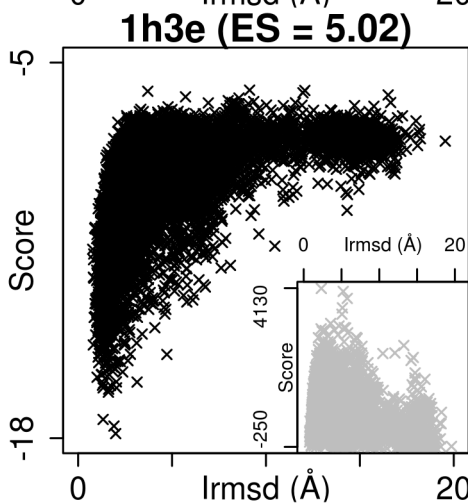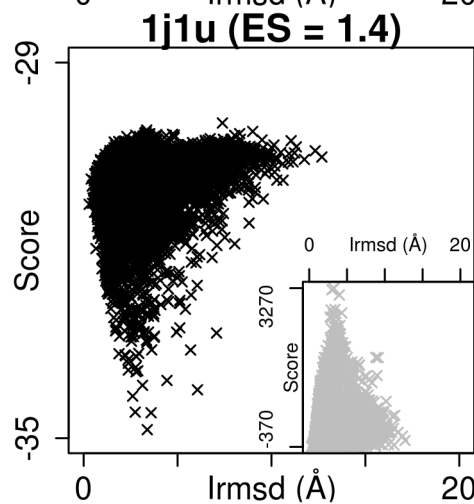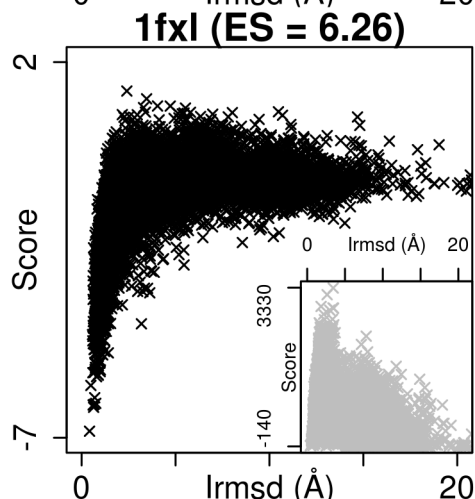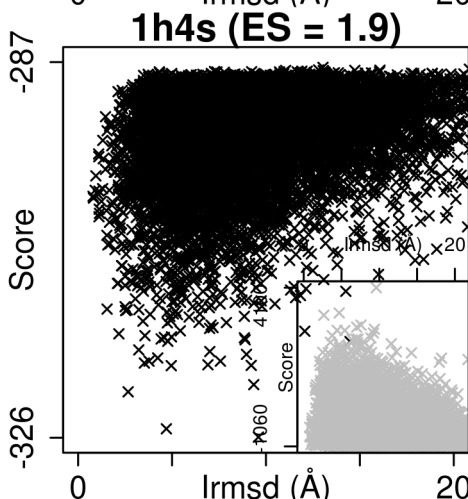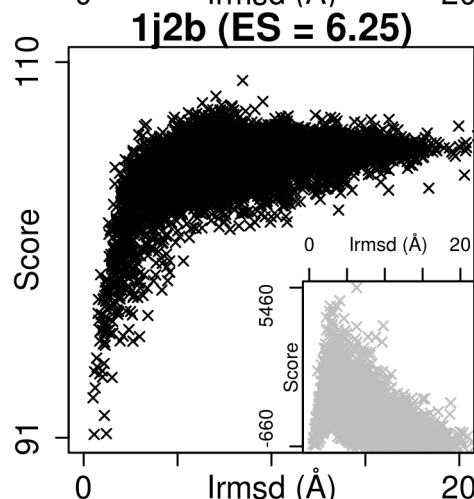

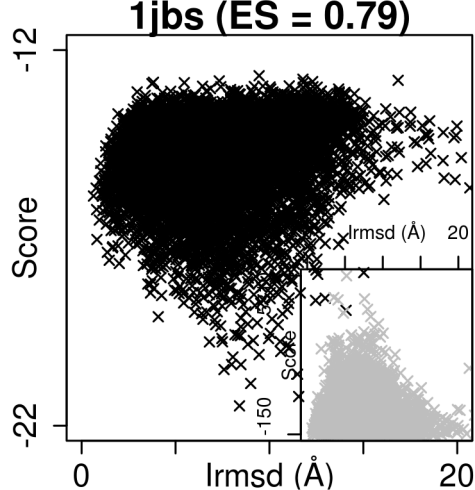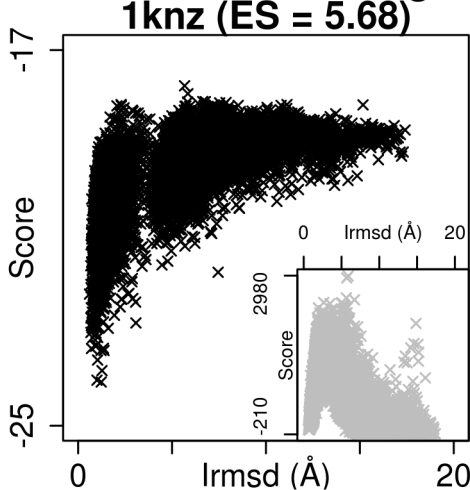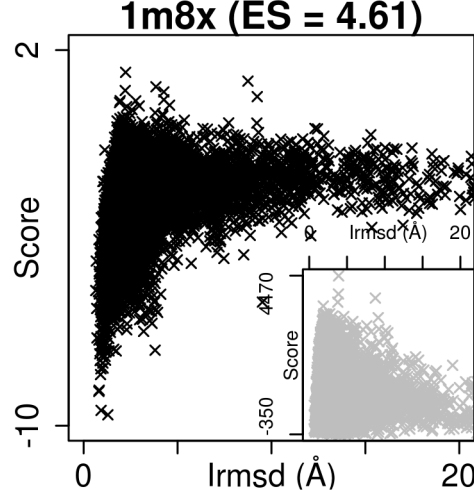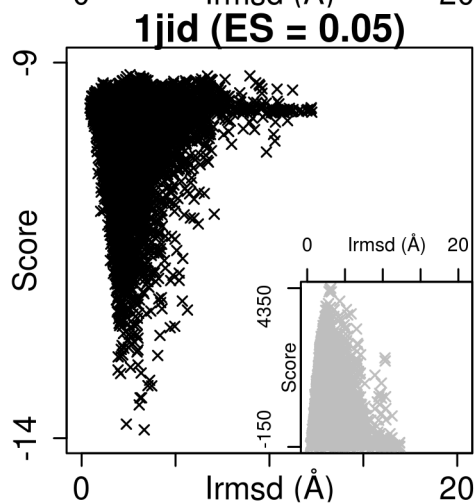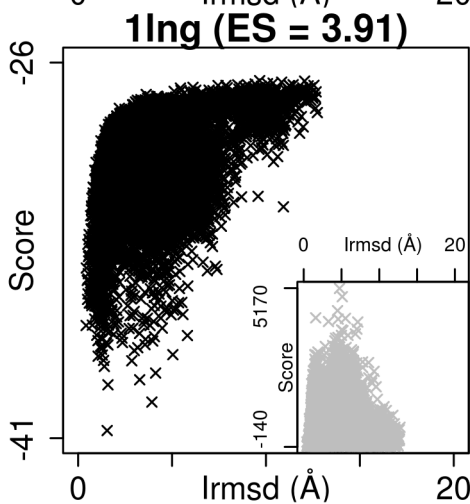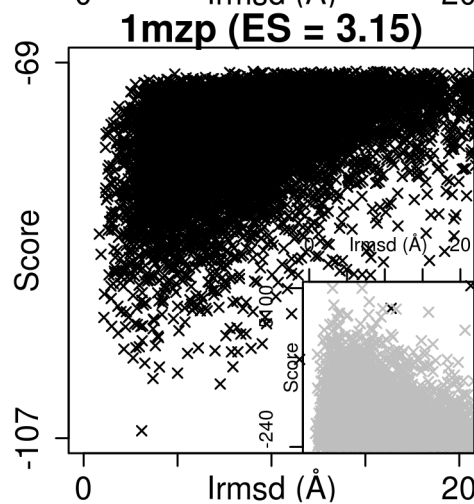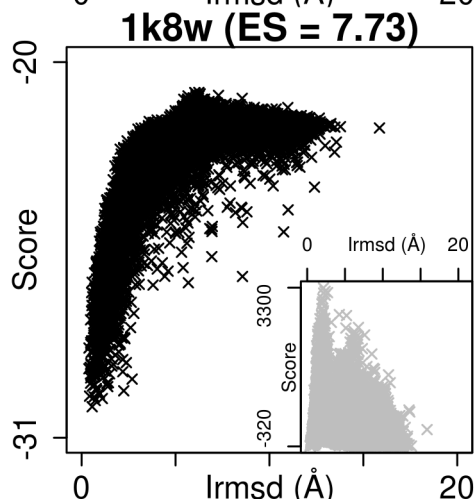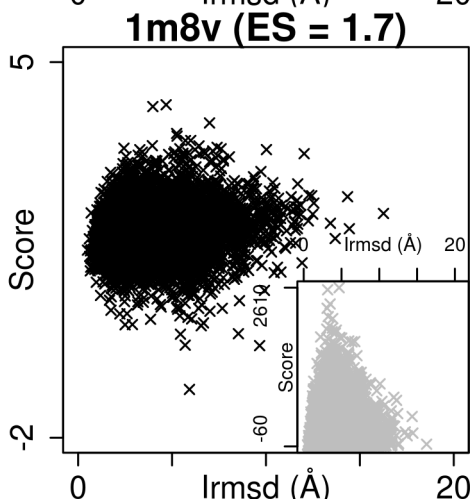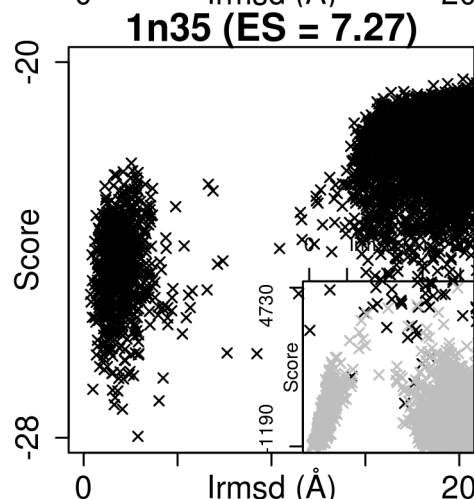

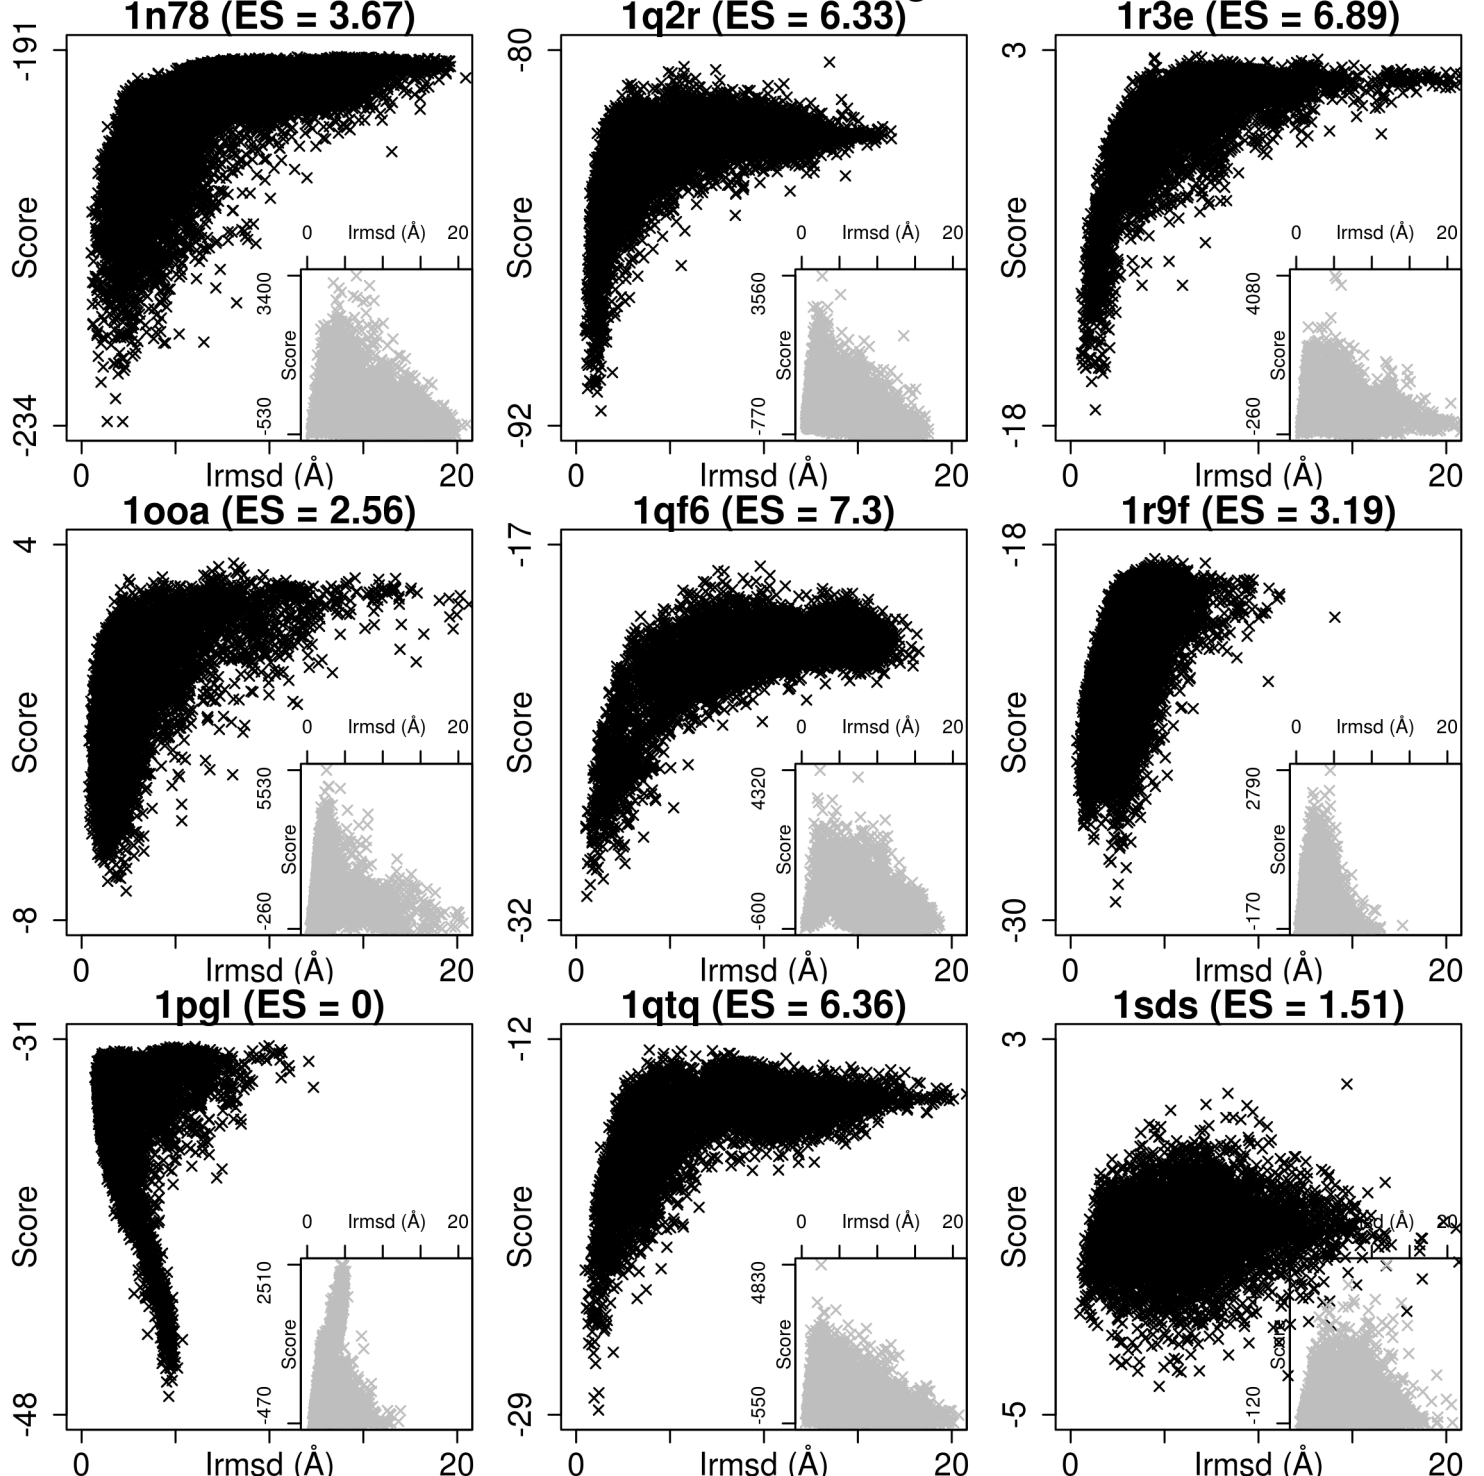

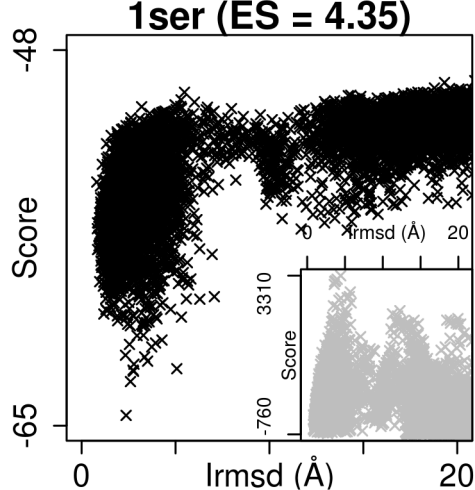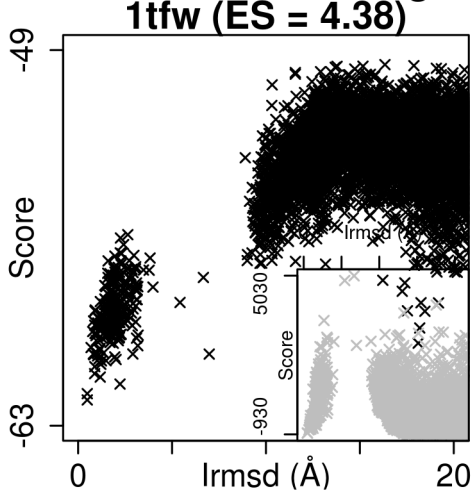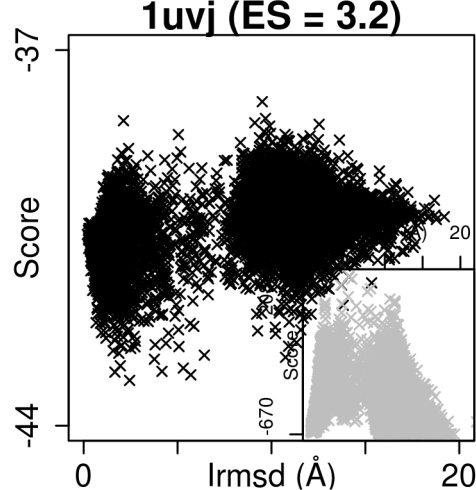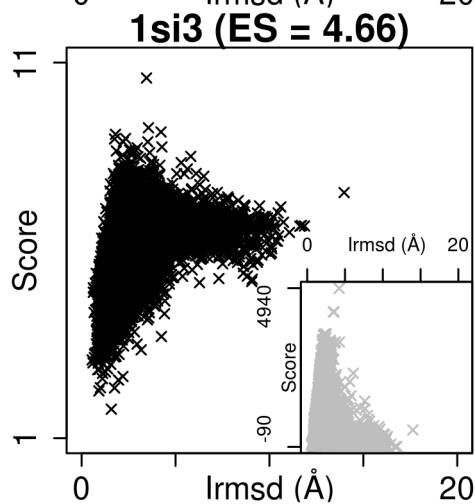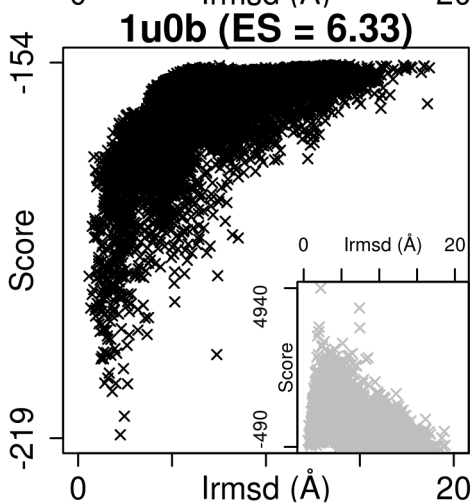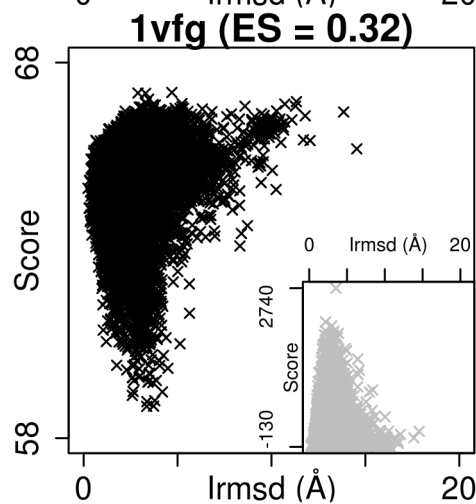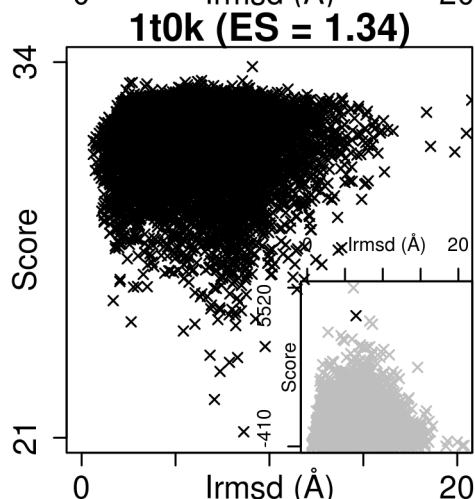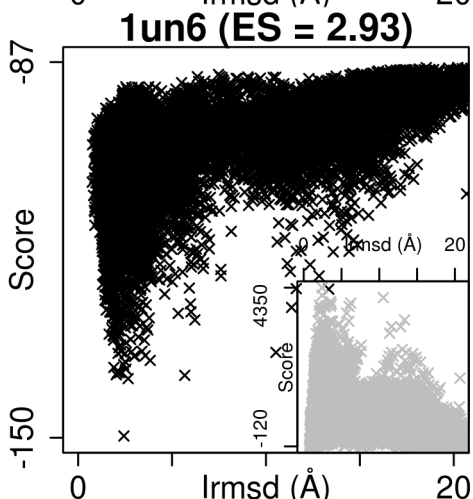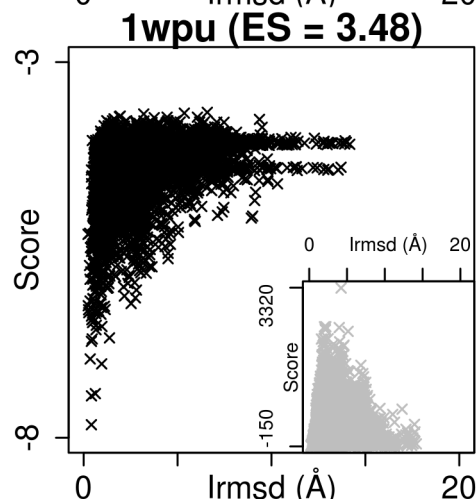

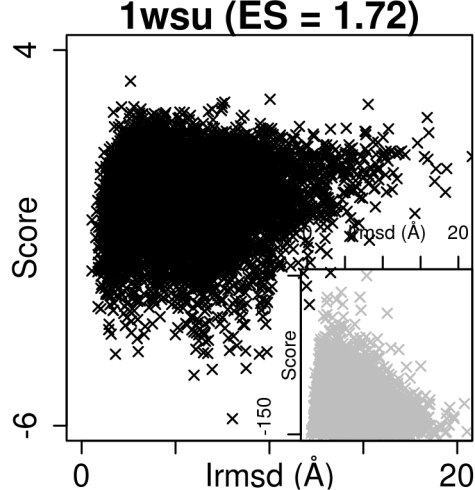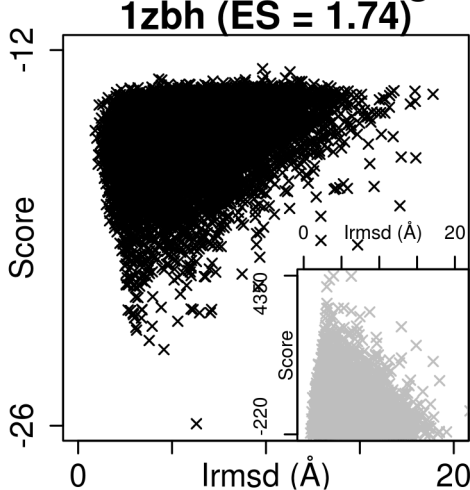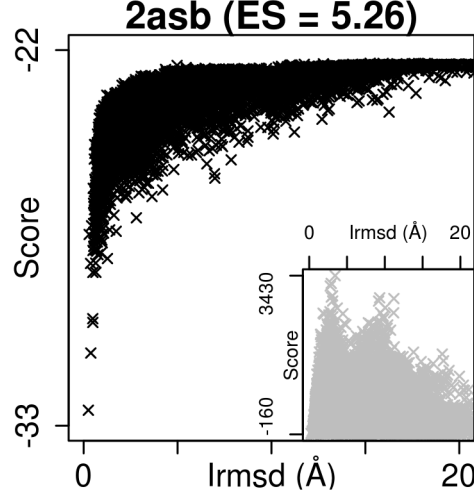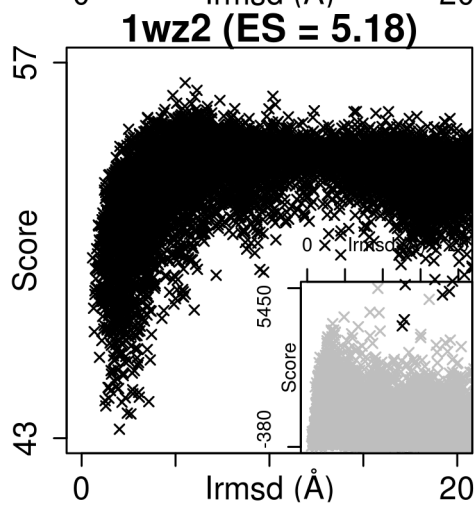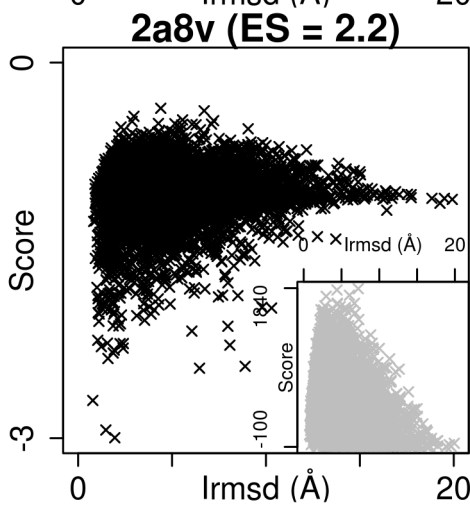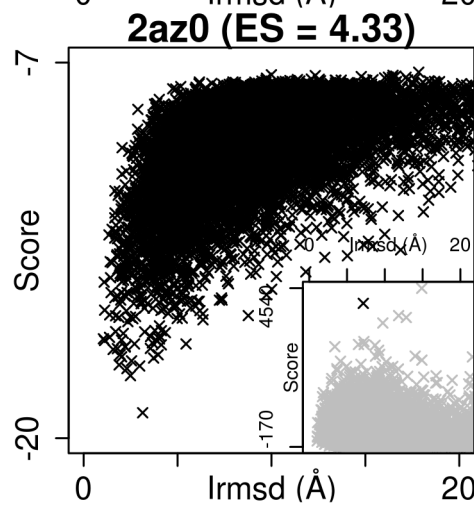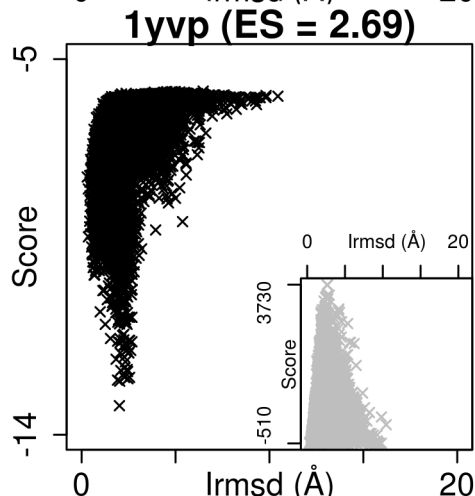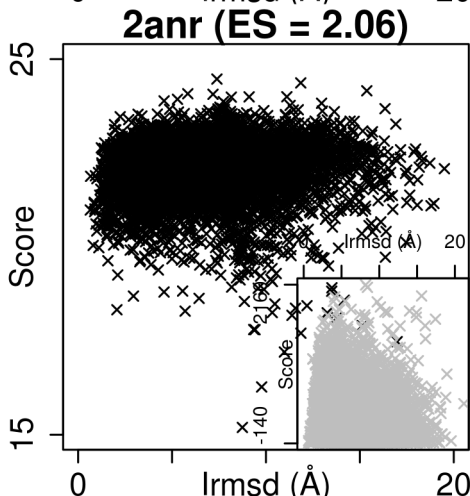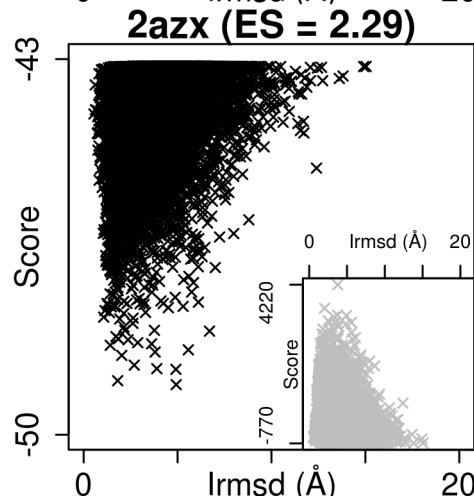

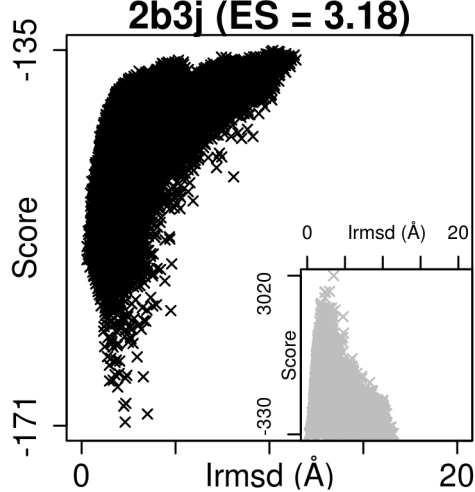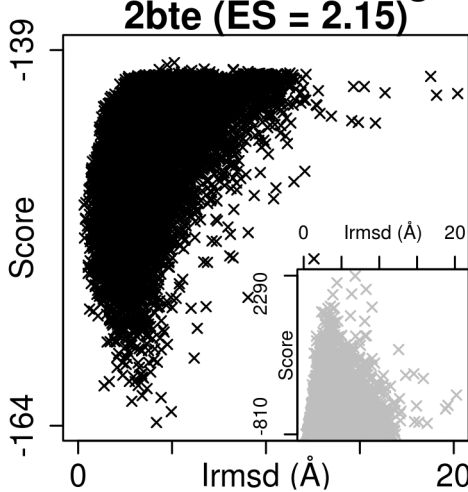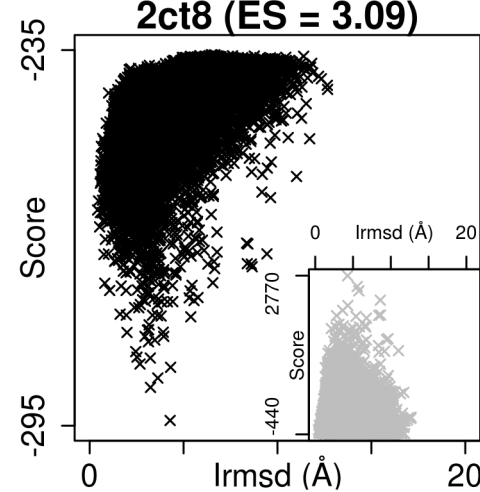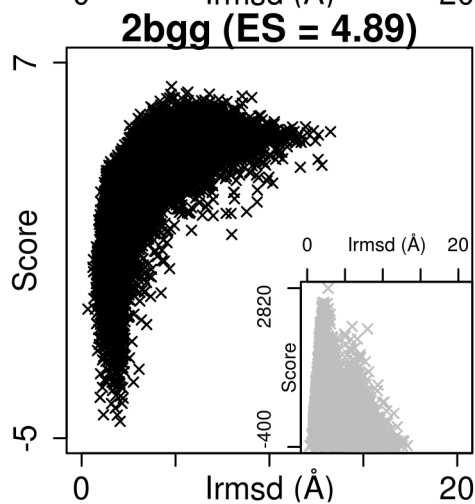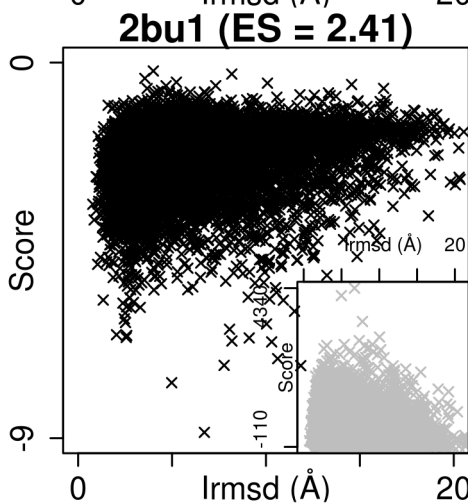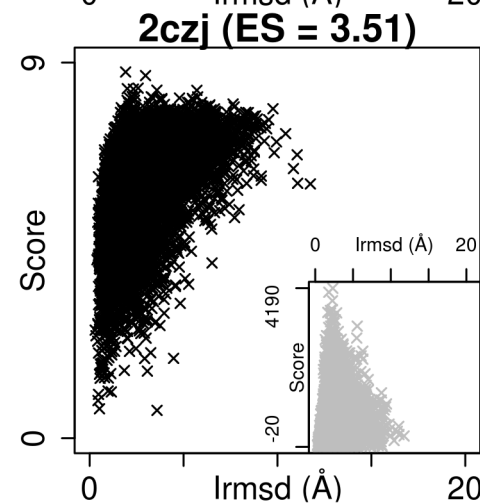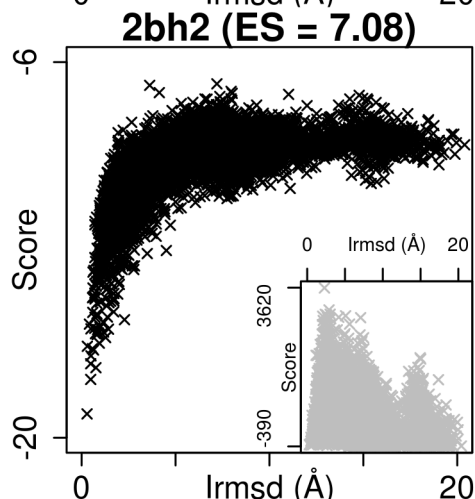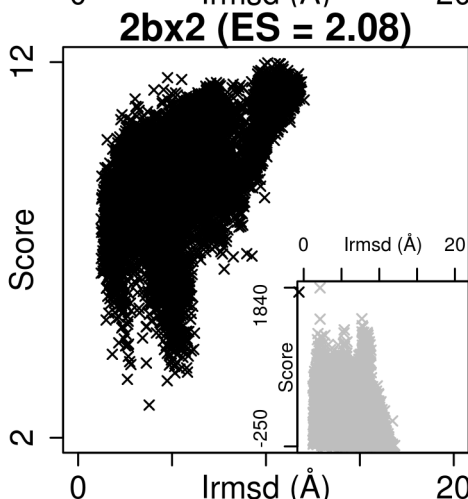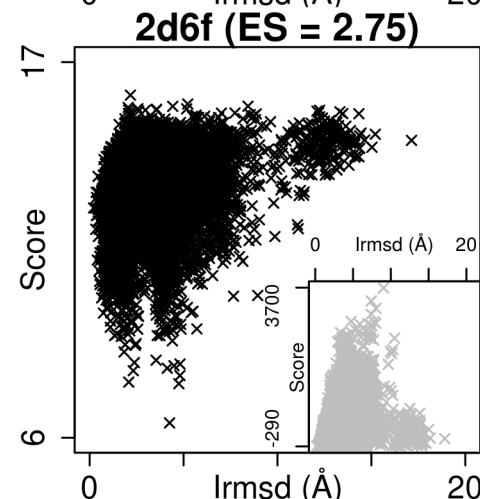

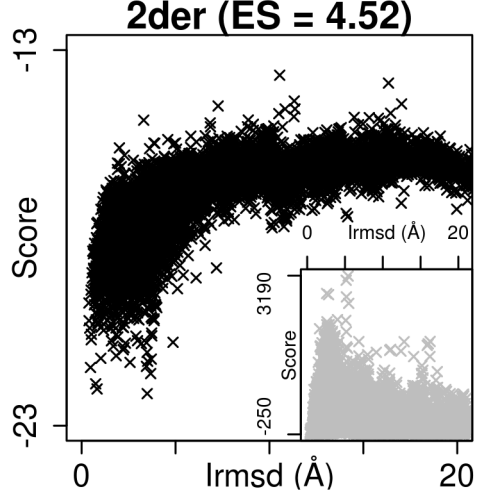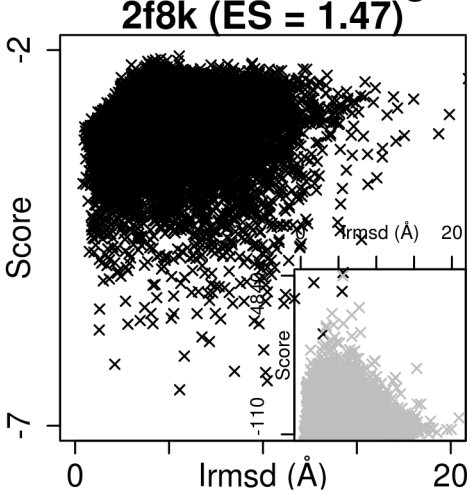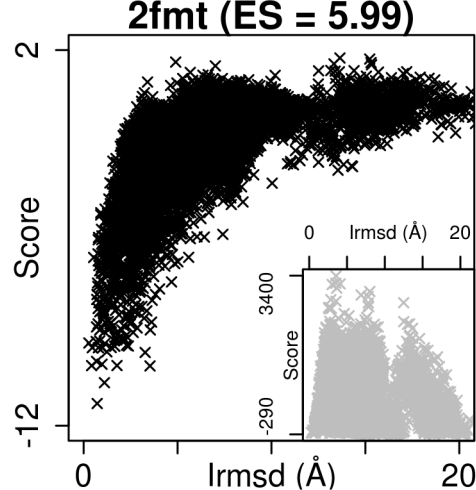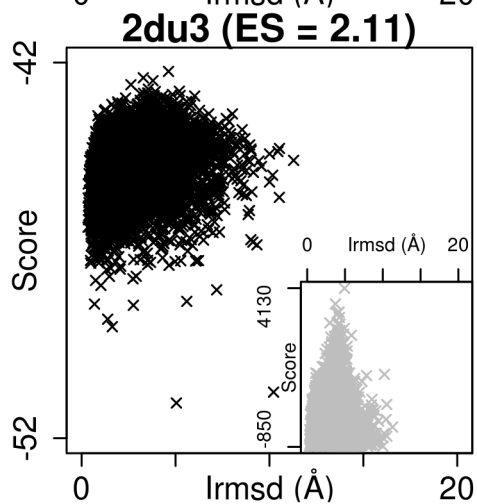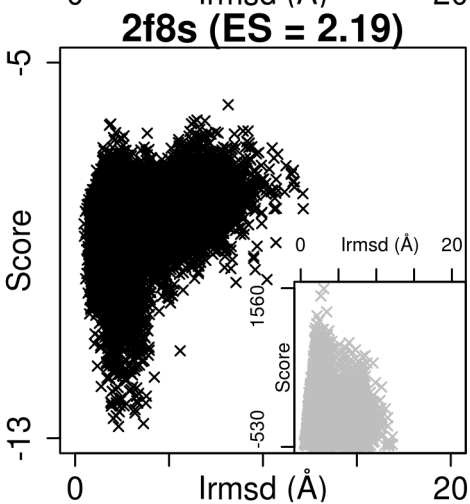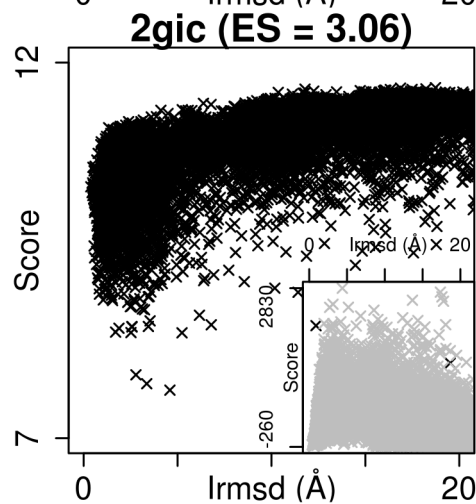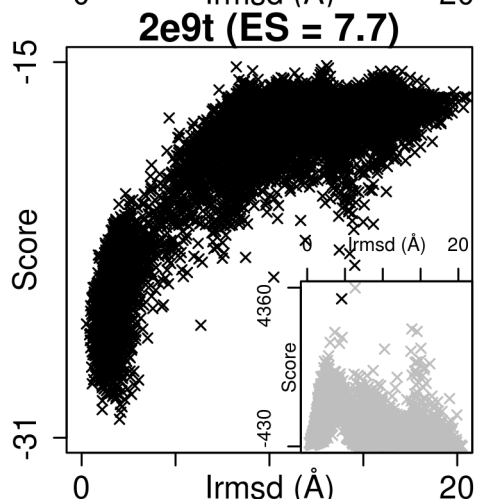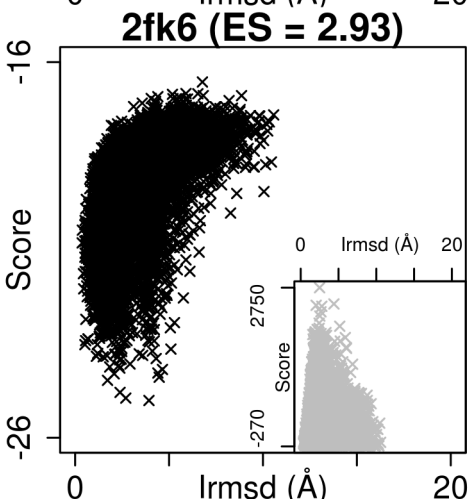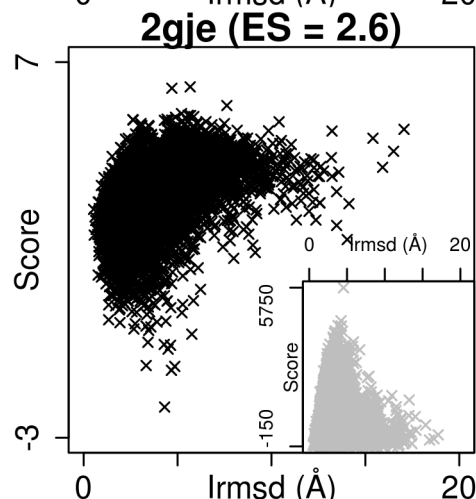



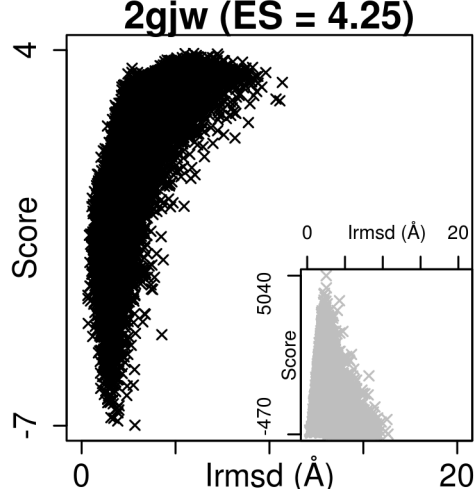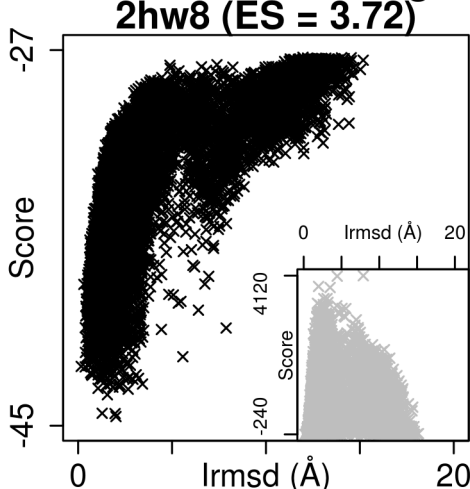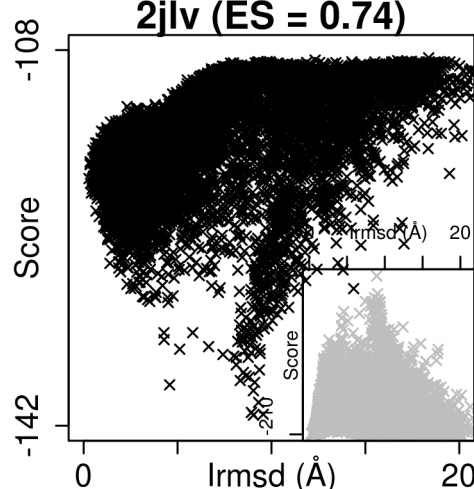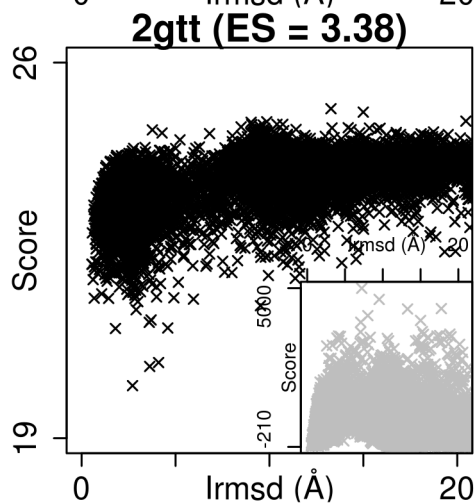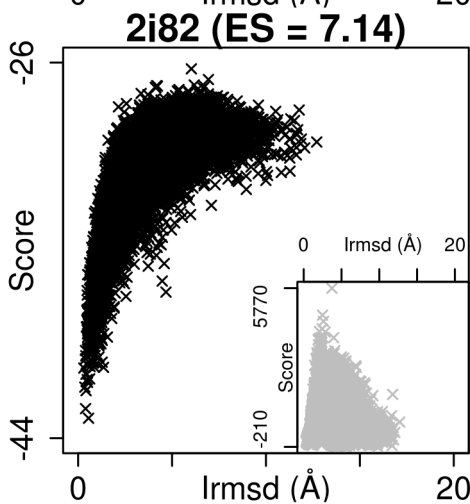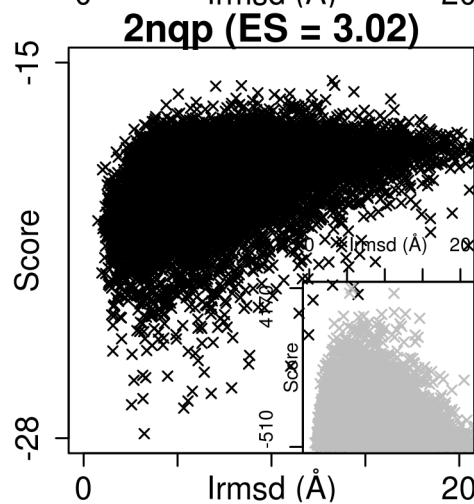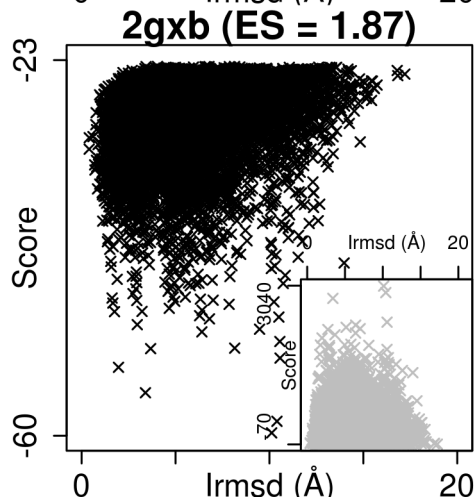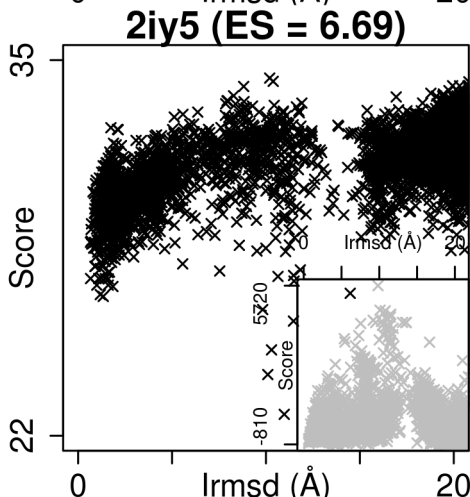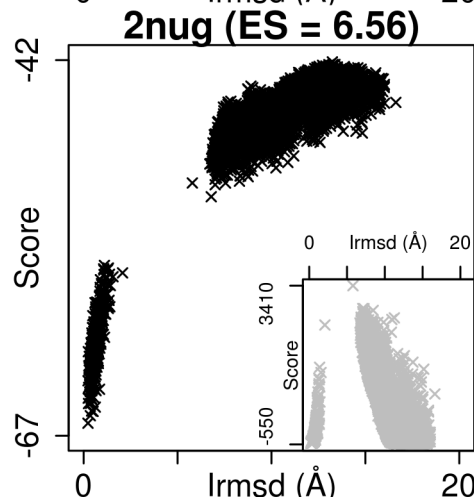

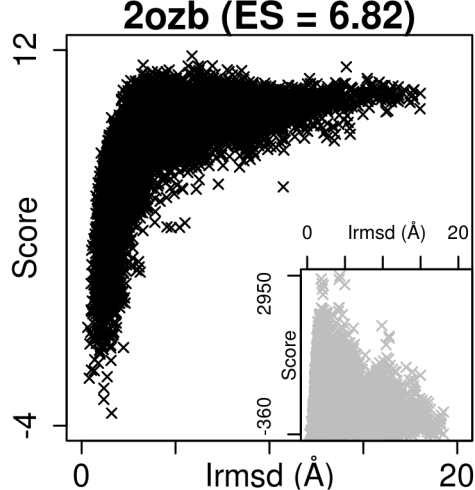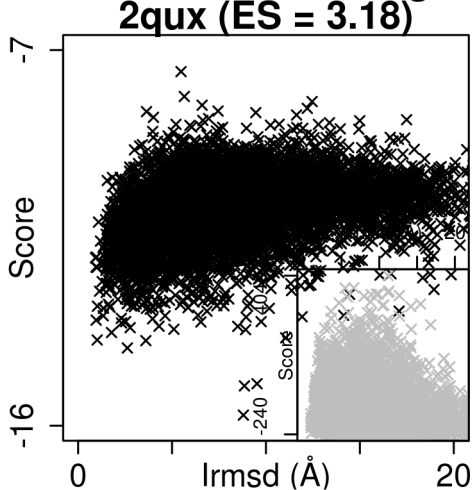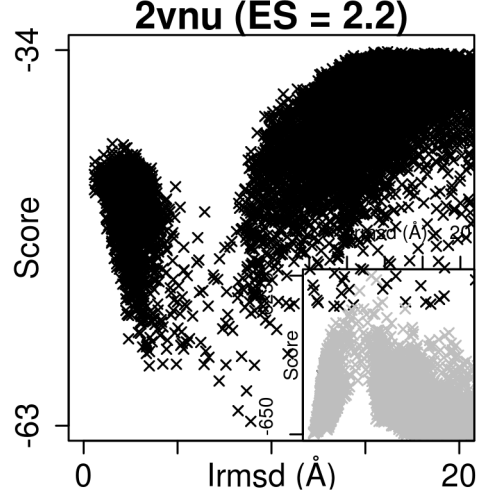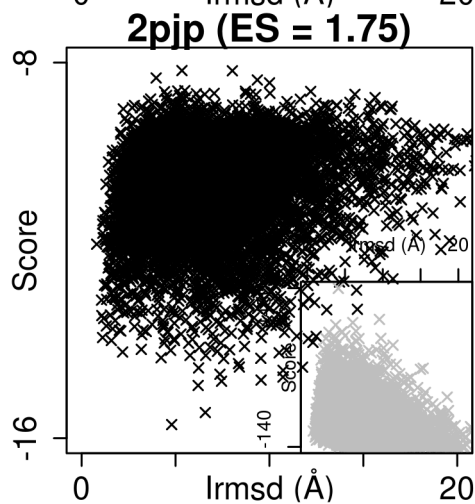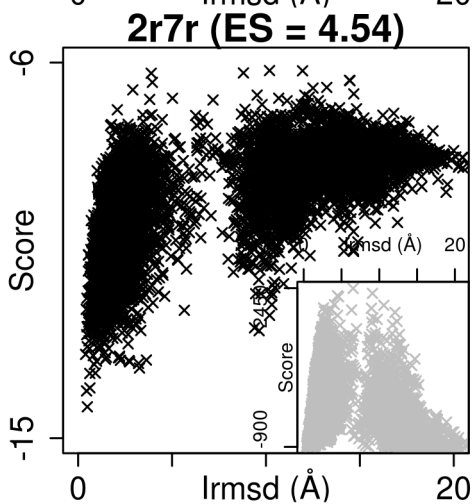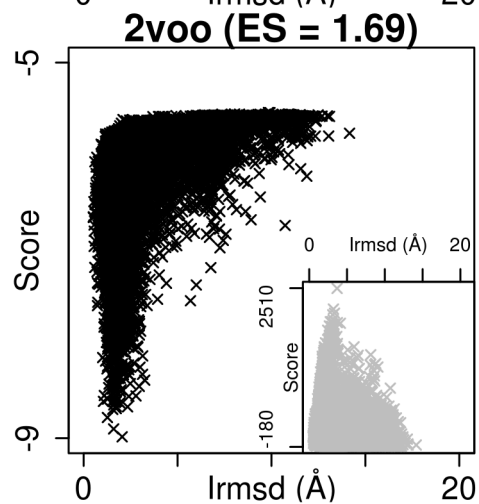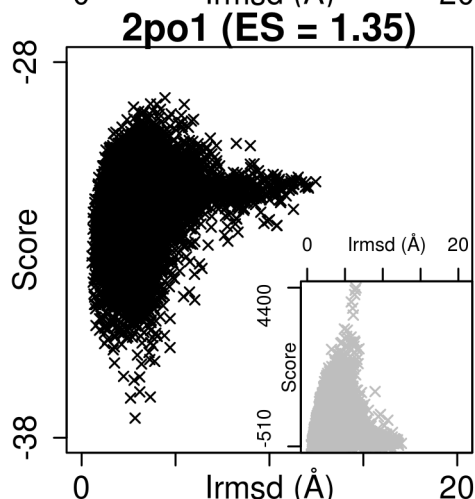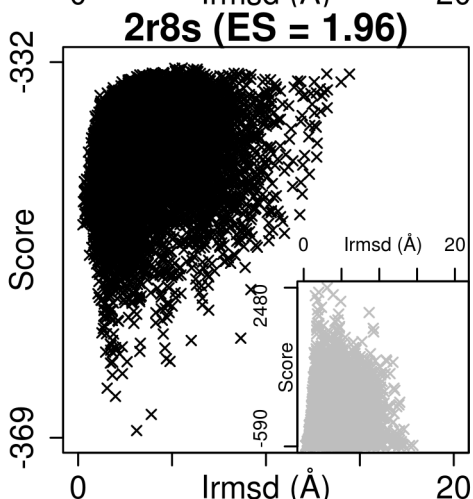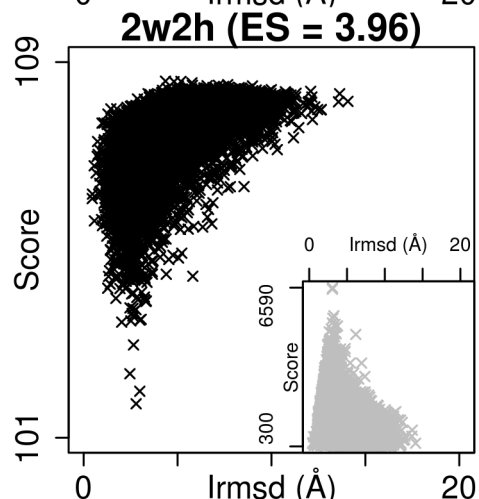

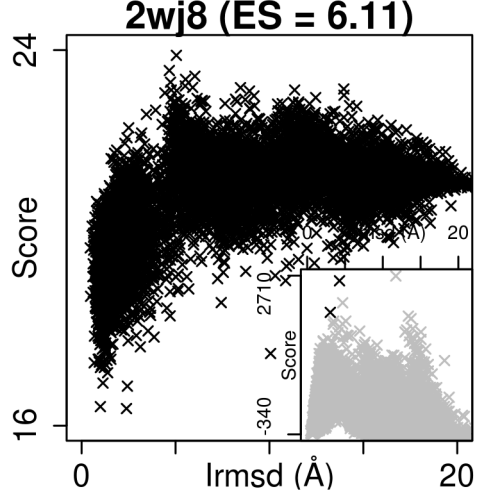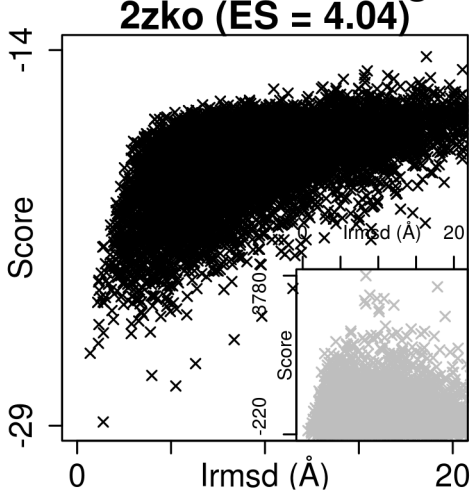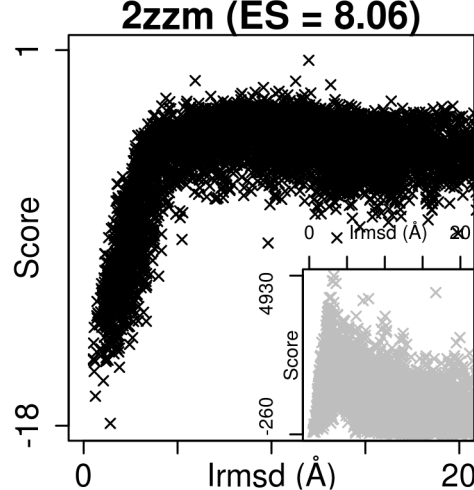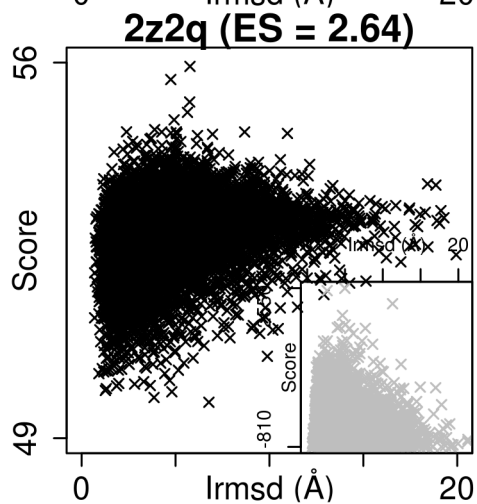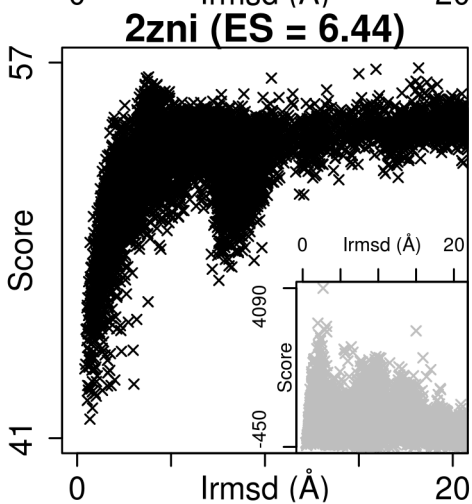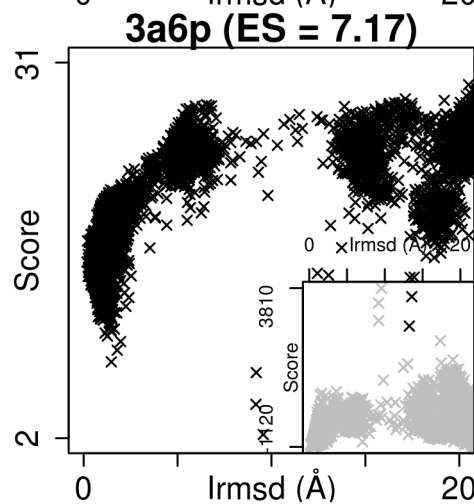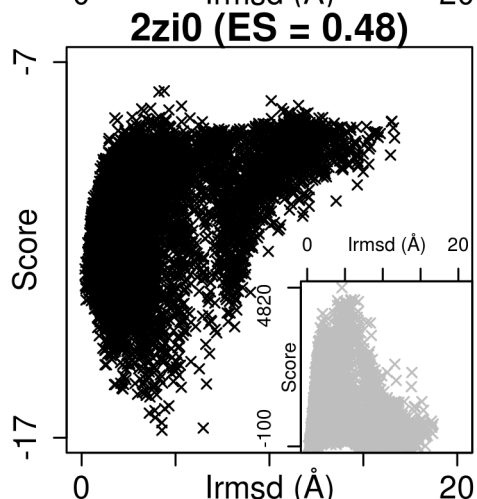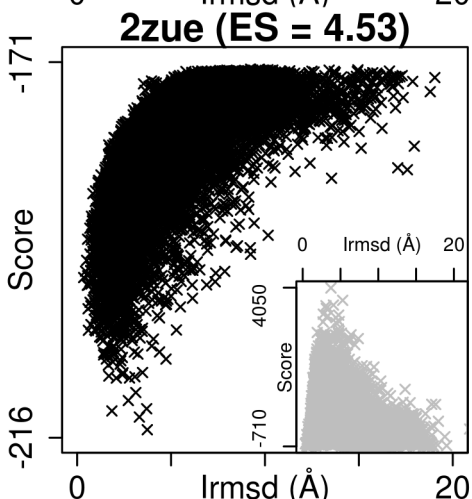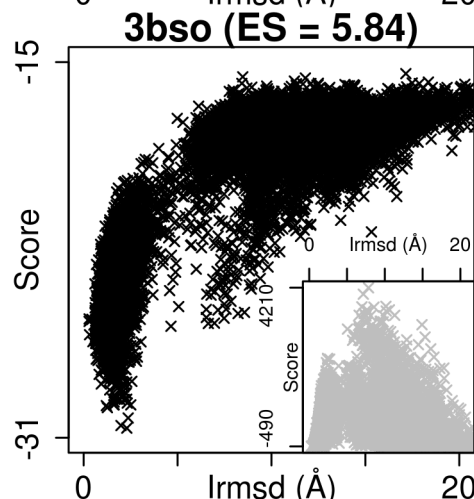

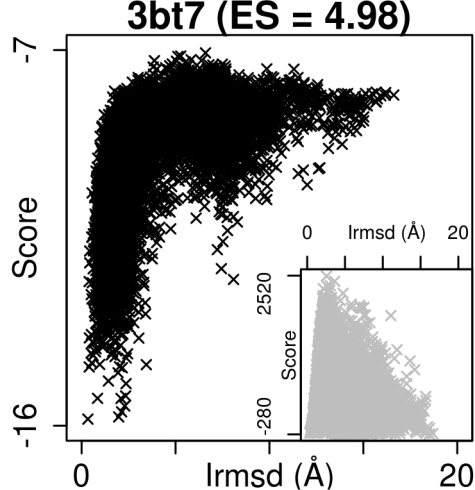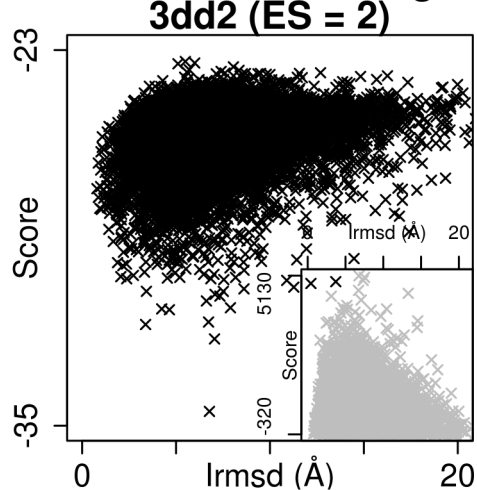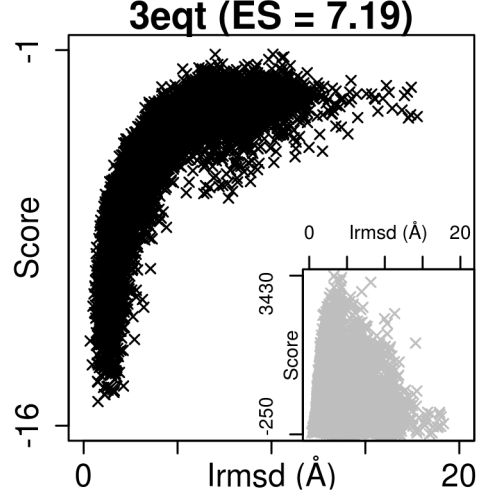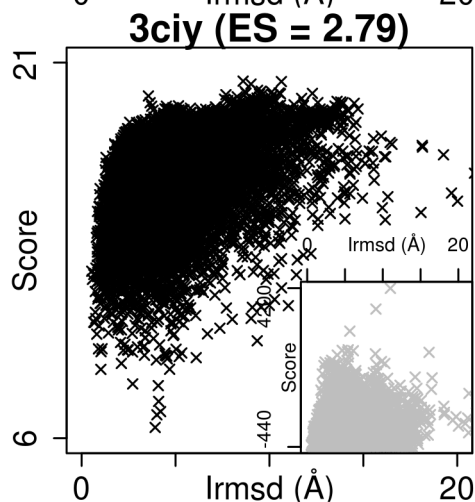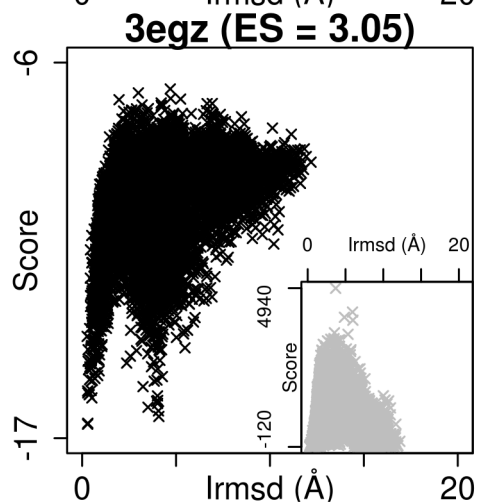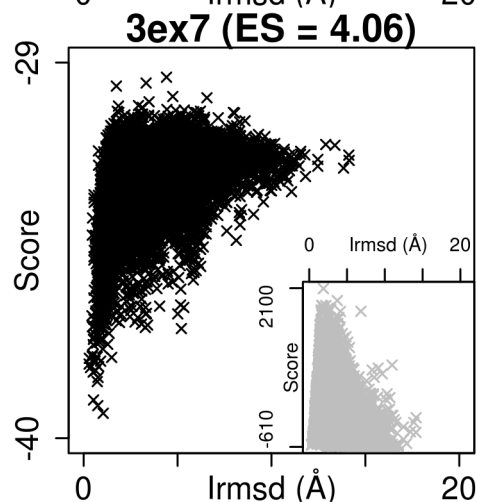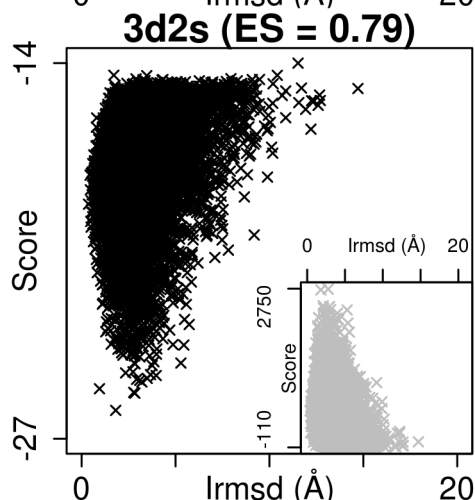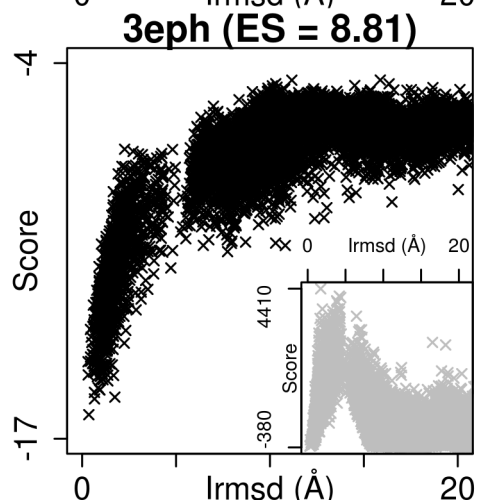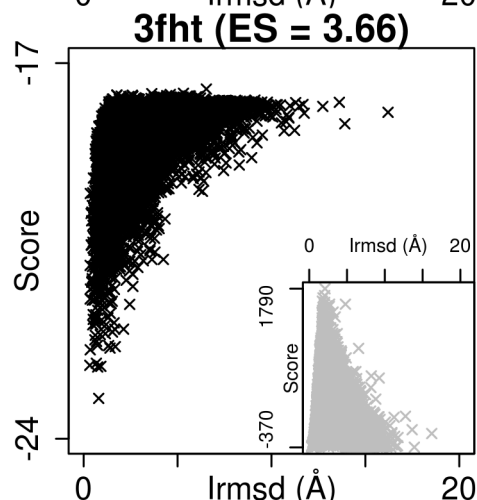

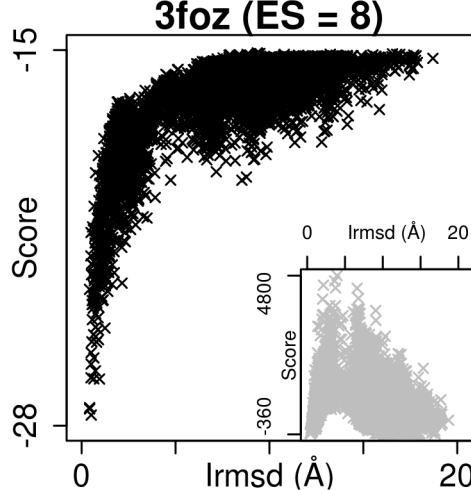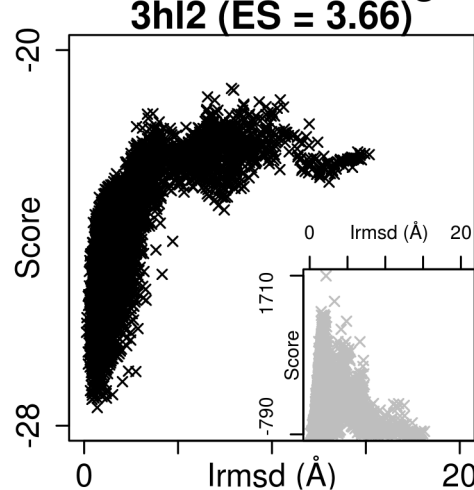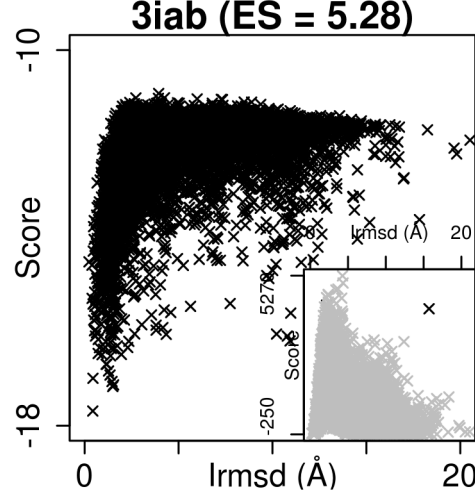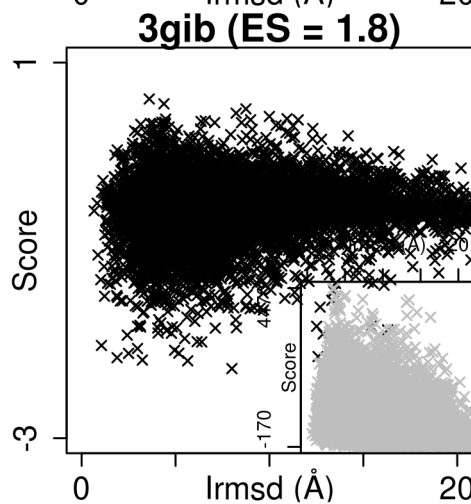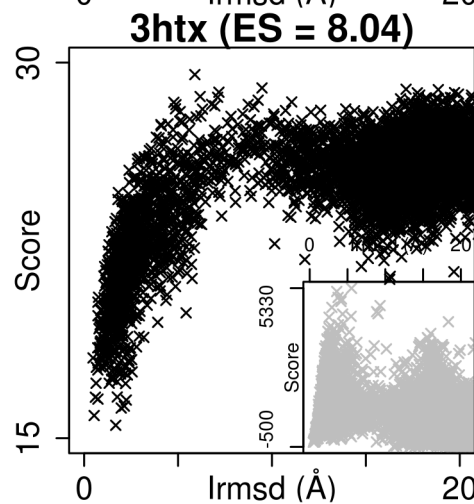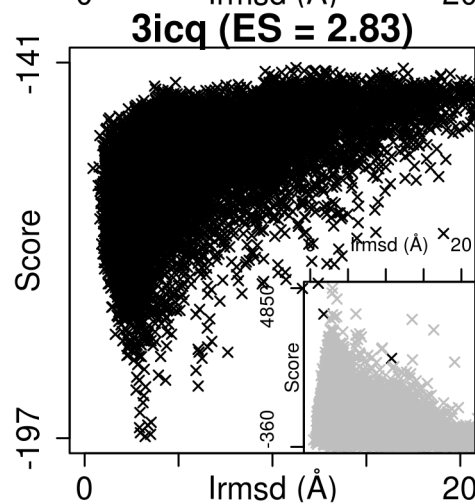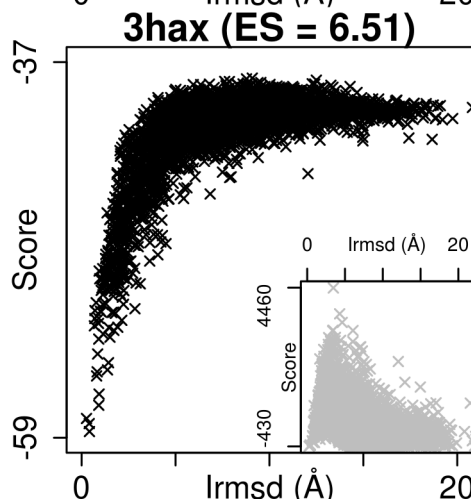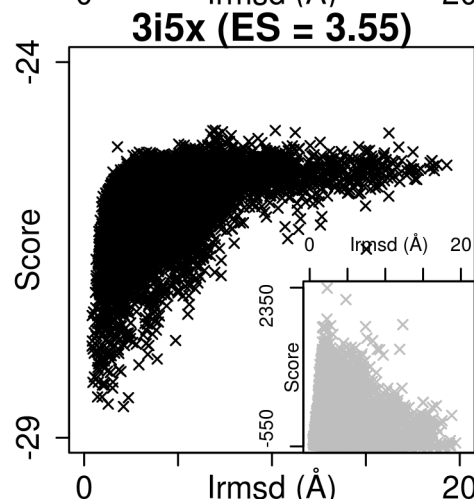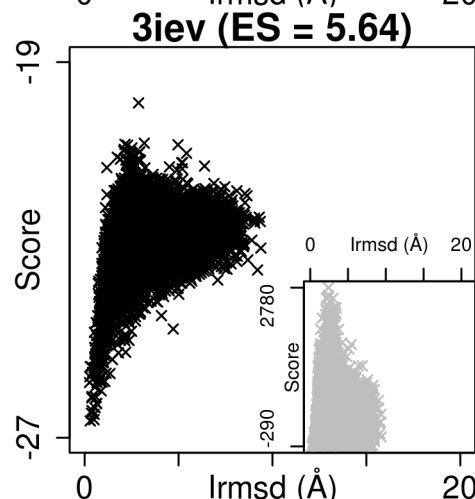

**3k62 (ES = 3.4)**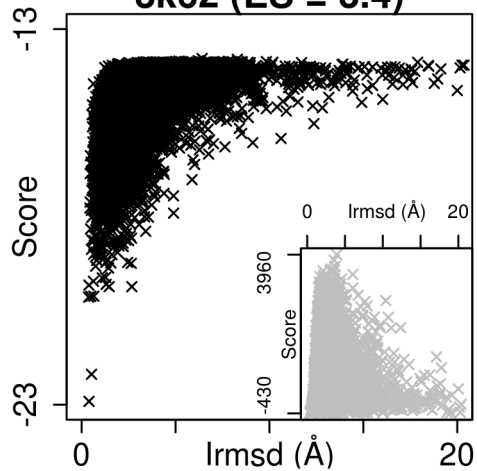**3l25 (ES = 7.02)**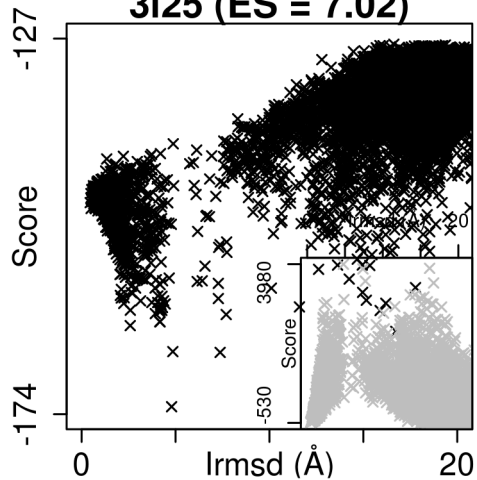**3snp (ES = 6.63)**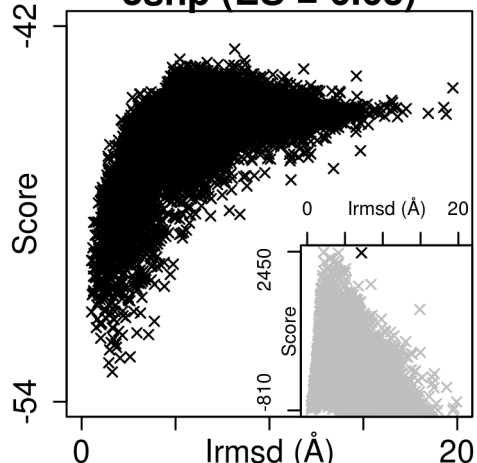

Supplement: pone.0108928.s002.pdf [file pone.0108928.s002.pdf]
