# Supplementary material for: Protein-RNA Complexes and Efficient Automatic Docking: Expanding RosettaDock Possibilities
Source: PubMed Central journal article supplement (PMC4182525; doi:10.1371/journal.pone.0108928), 2014-09-30

**1b7f (ES = 5.15)**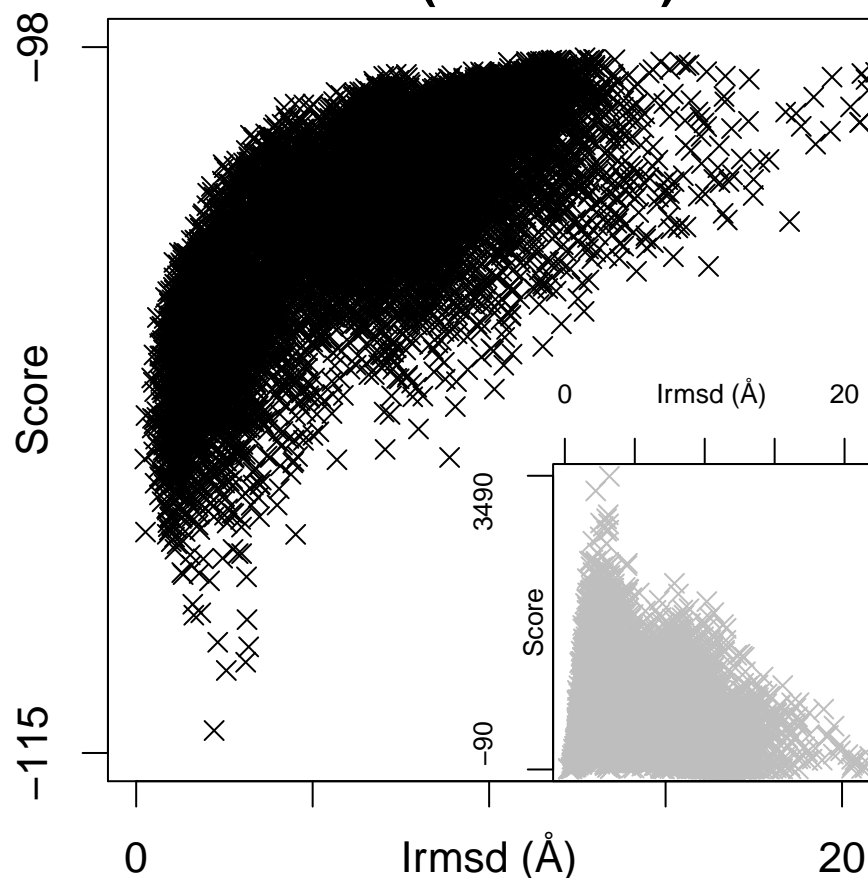**1c9s (ES = 1.19)**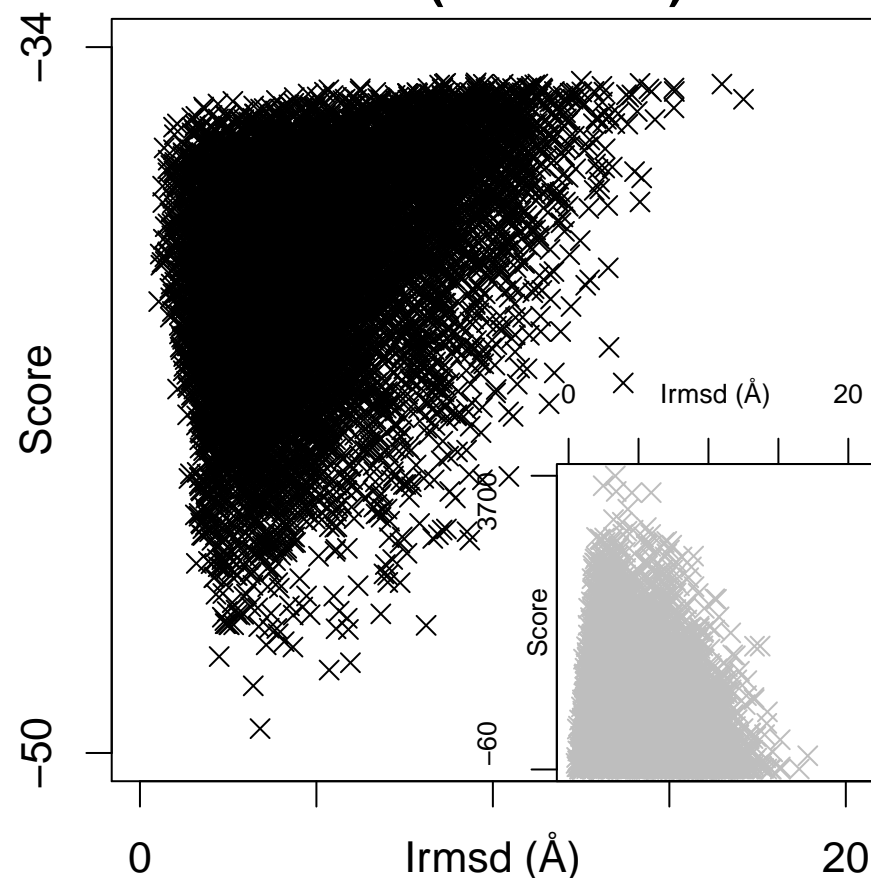**1dk1 (ES = 2.58)**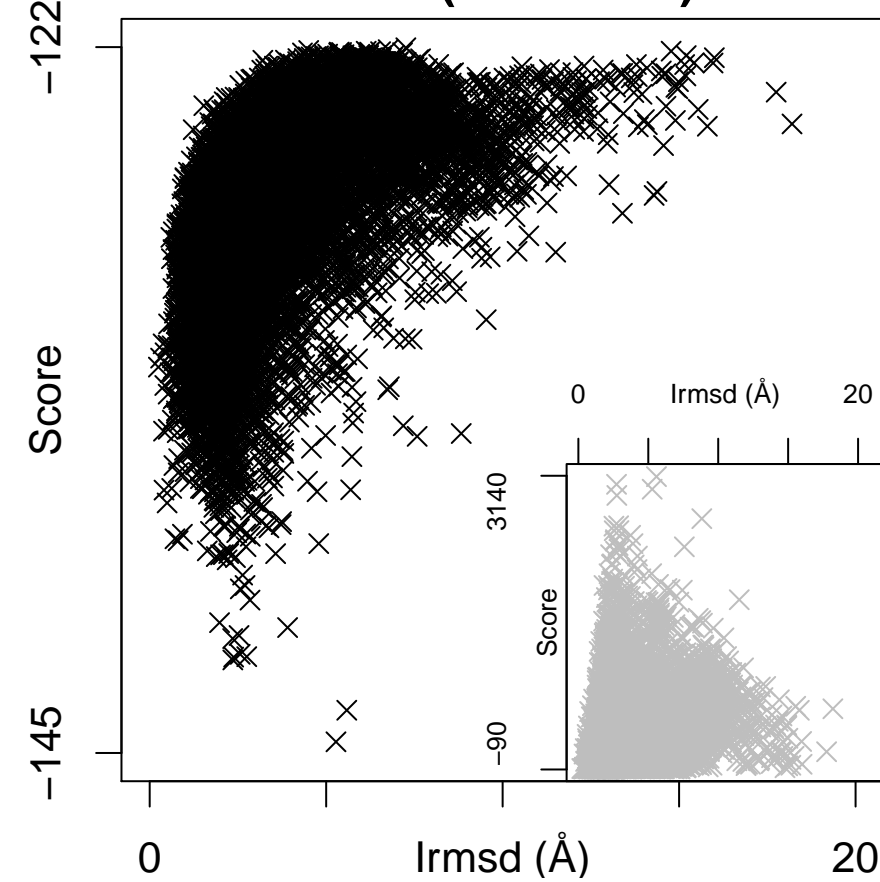**1e7k (ES = 1.33)**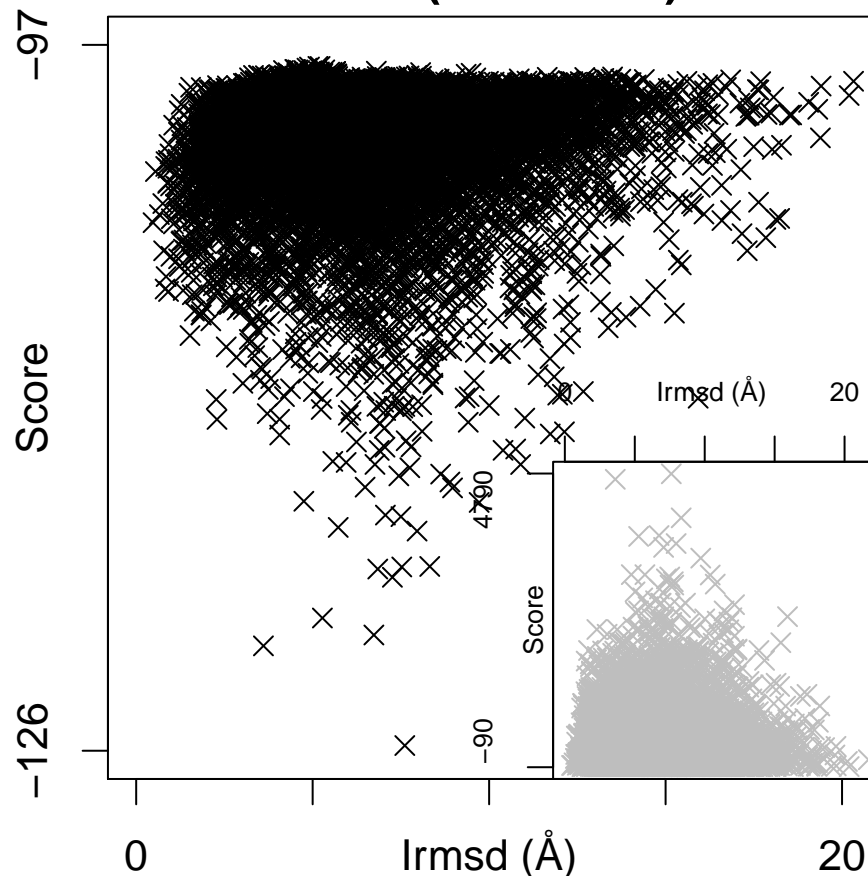**1ec6 (ES = 0.88)**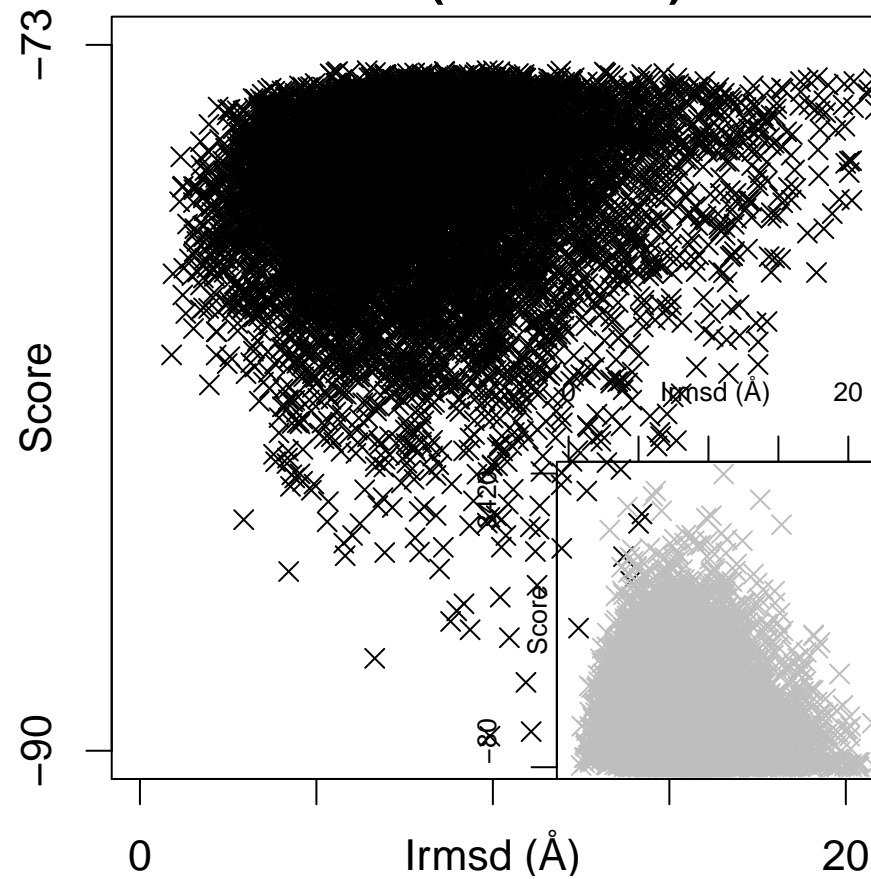**1efw (ES = 2.9)**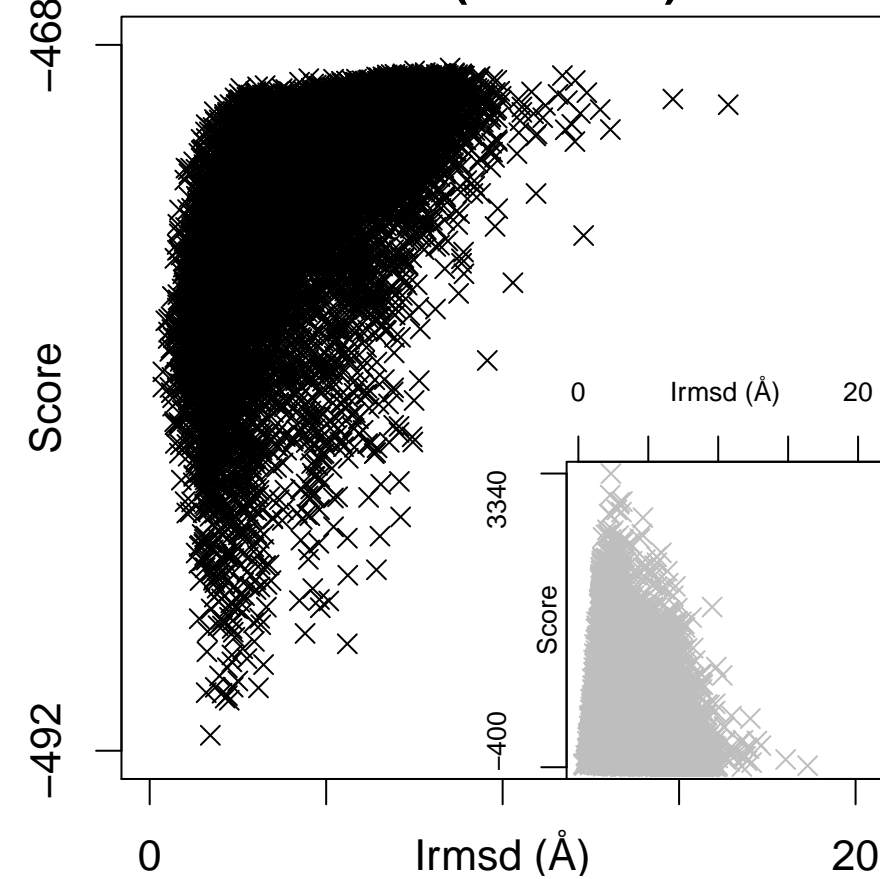**1ekz (ES = 0.81)**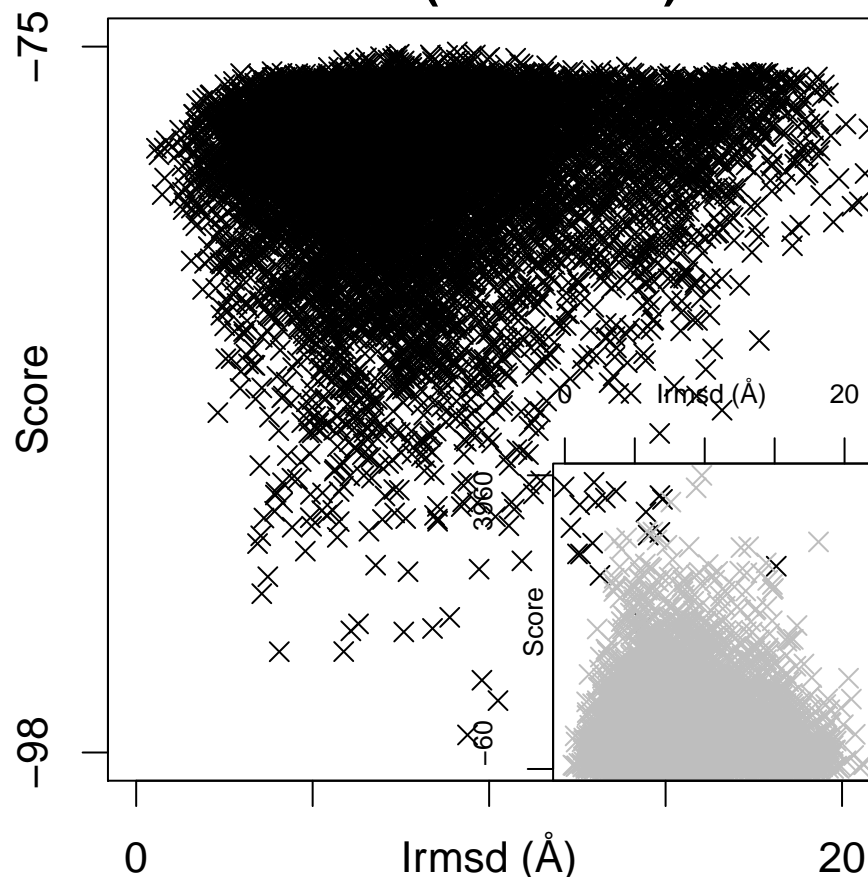**1g1x (ES = 0.54)**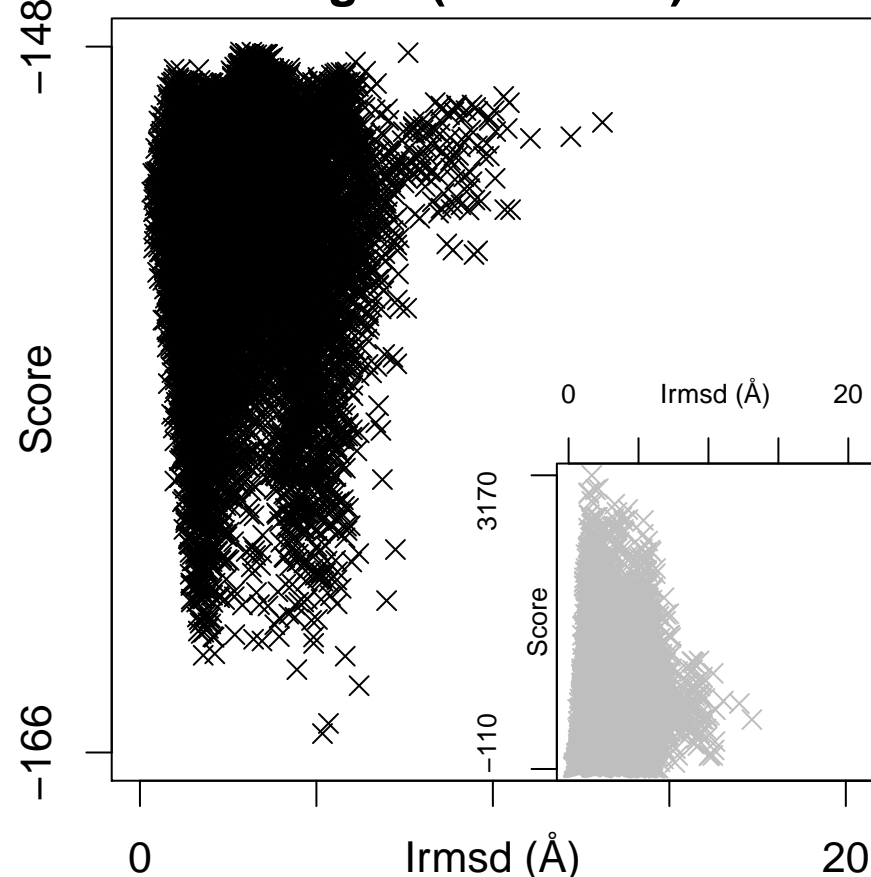**1hc8 (ES = 3.63)**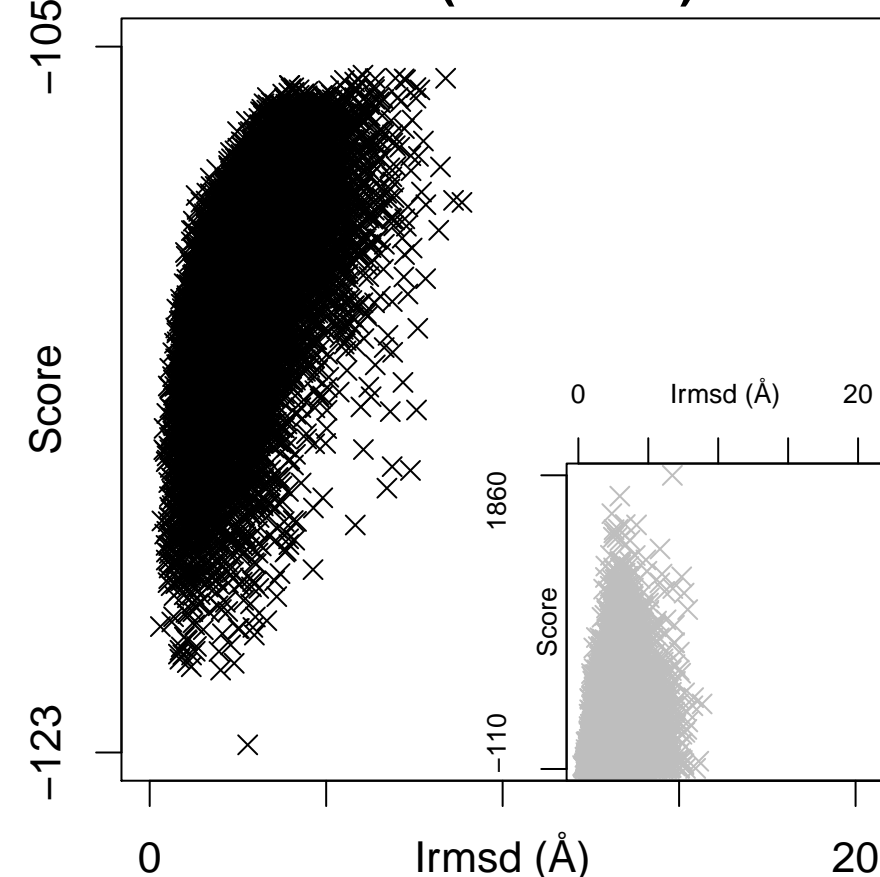

**1hvu (ES = 1.93)**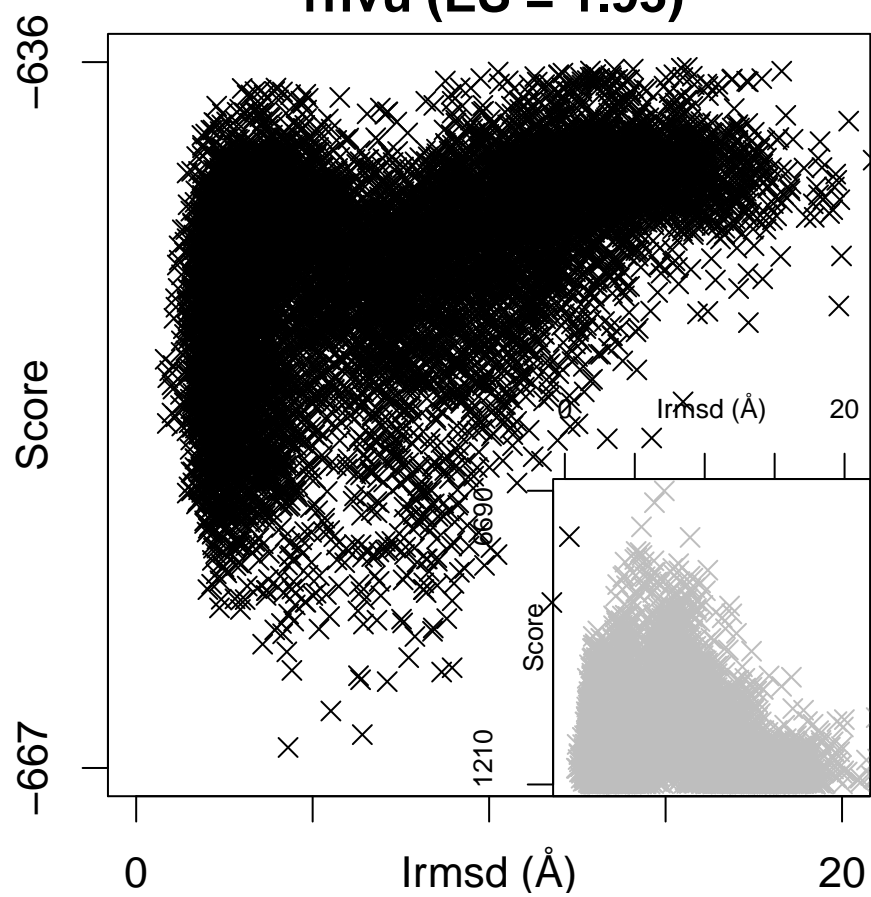**1jbr (ES = 0.02)**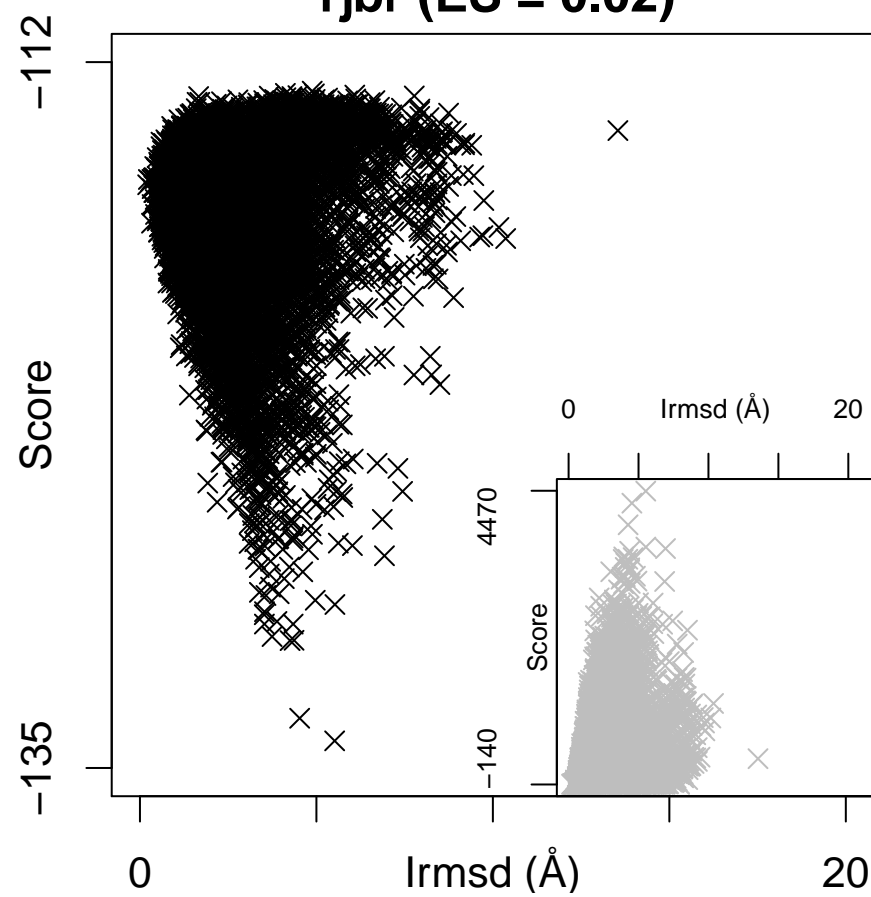**1kog (ES = 1.14)**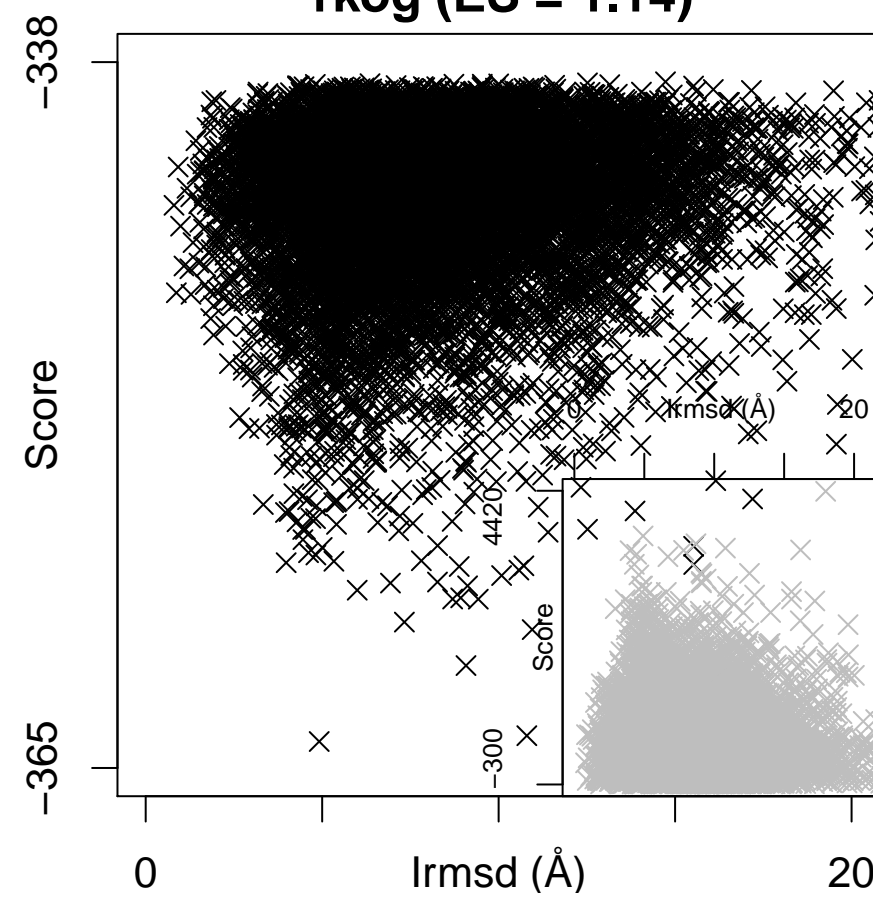**1kq2 (ES = 5.4)**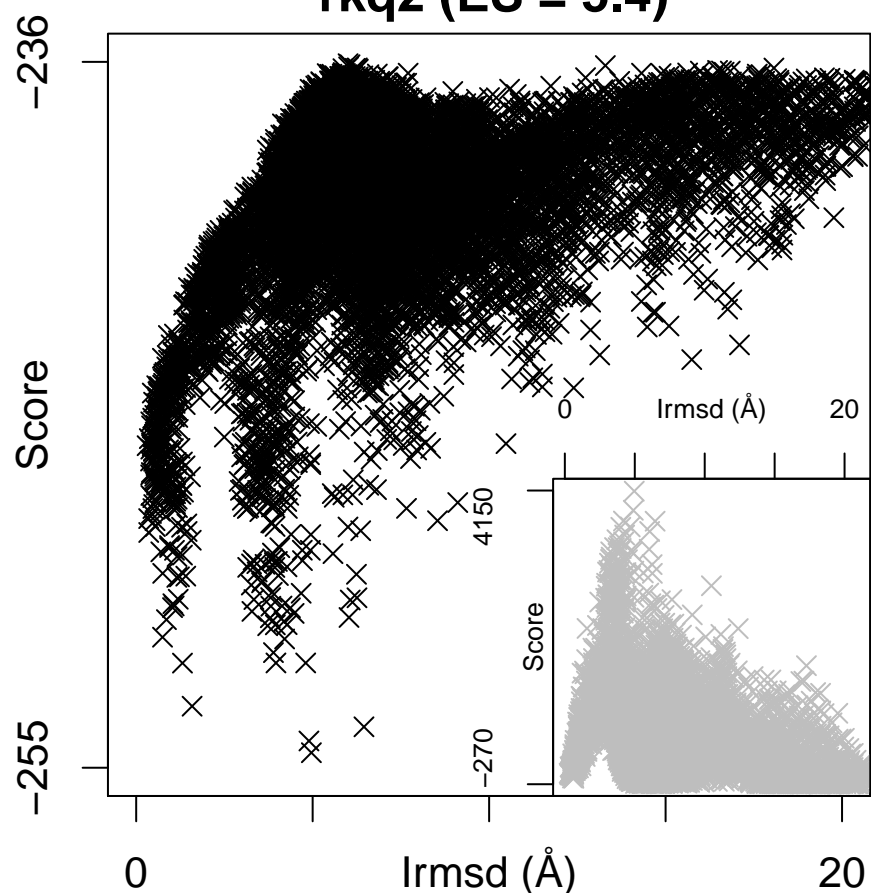**1m5o (ES = 1.33)**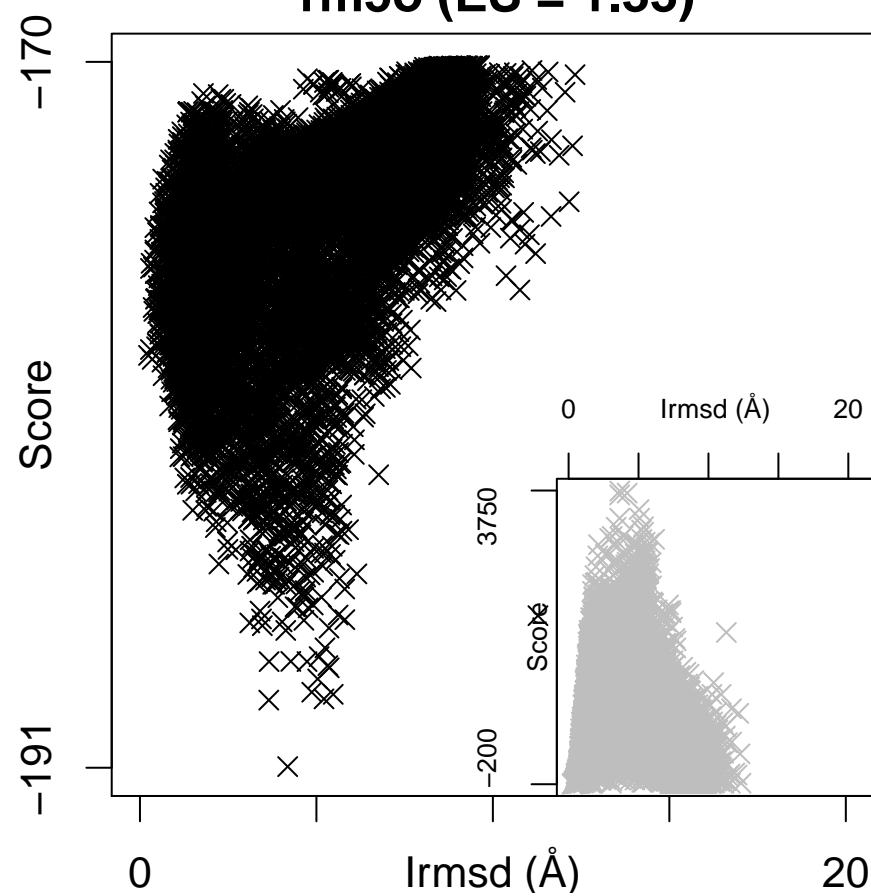**1m8w (ES = 1.27)**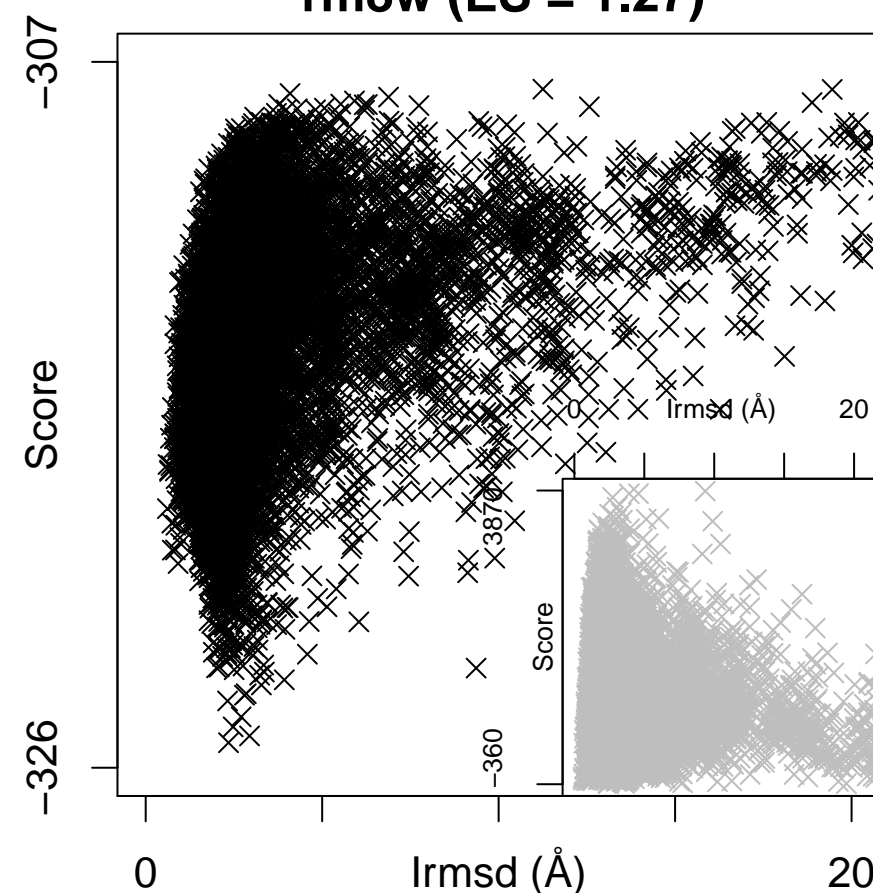**1mfq (ES = 2.35)**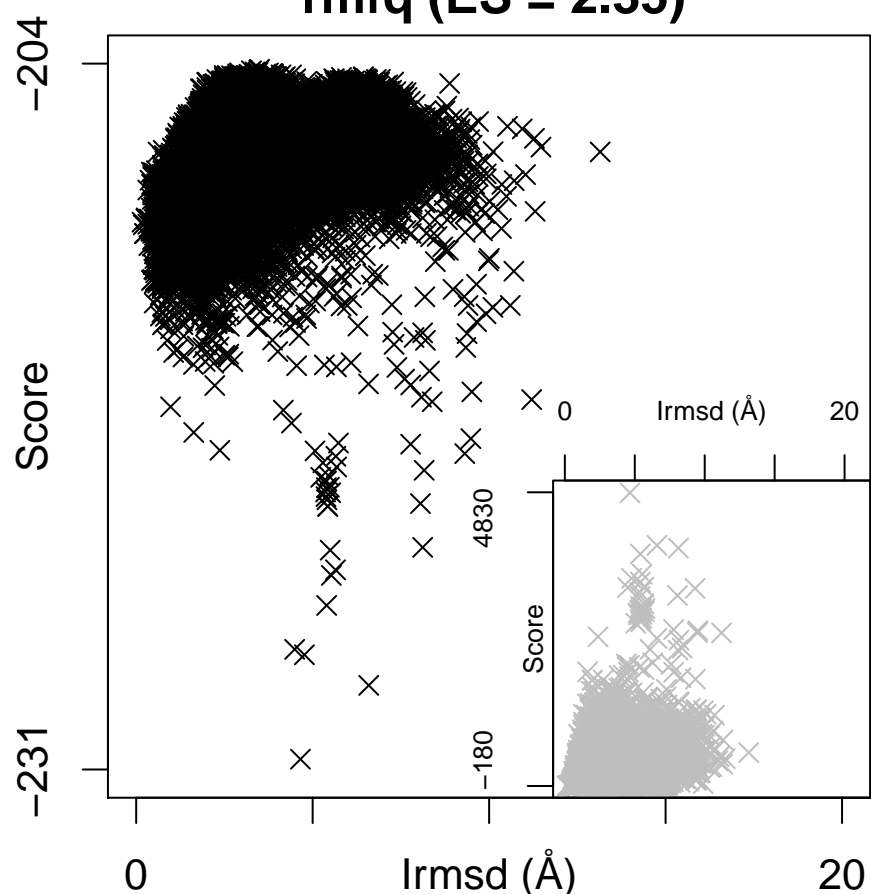**1mms (ES = 3.31)**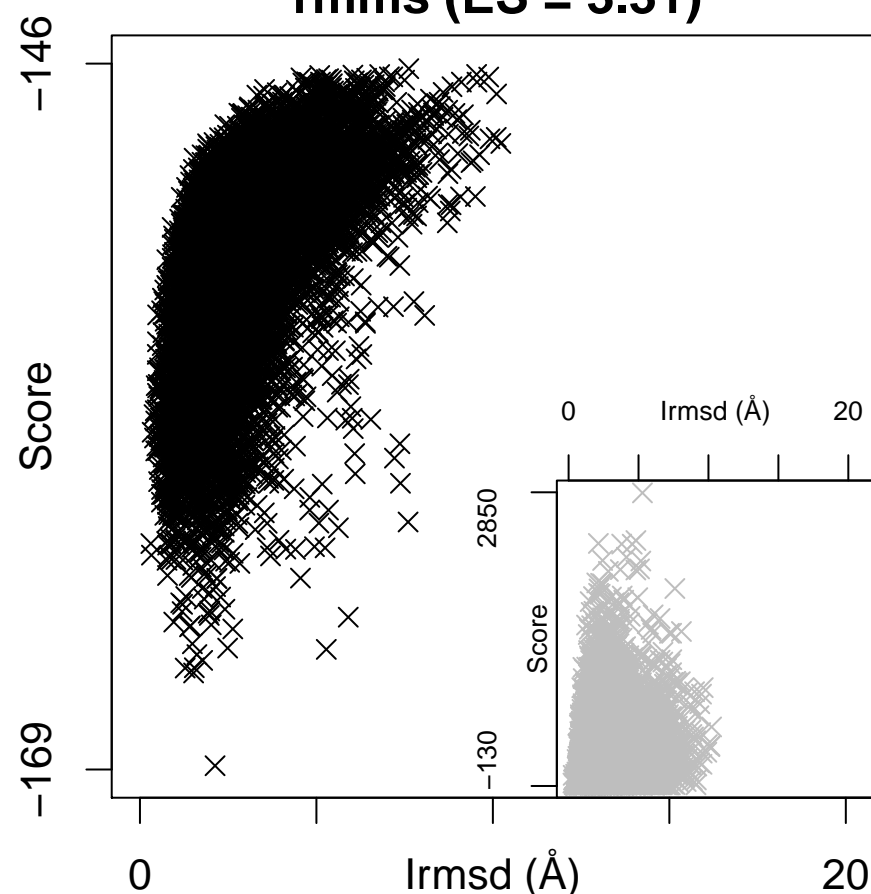**1msw (ES = 8.84)**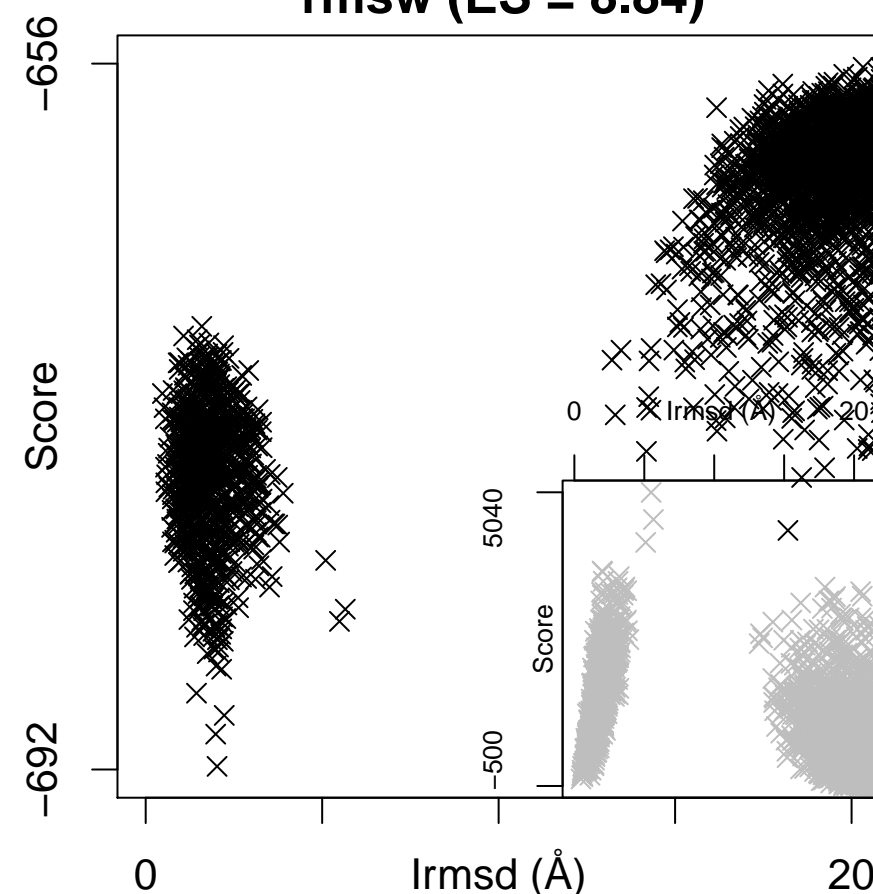

**1ob2 (ES = 3.38)**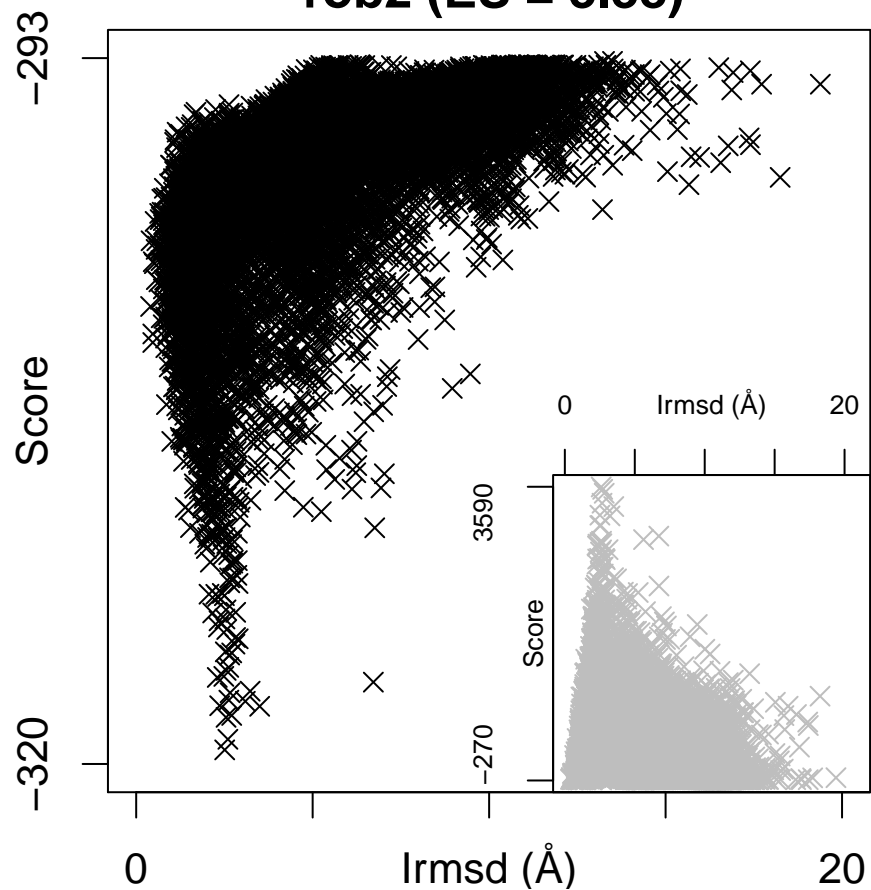**1u63 (ES = 1.13)**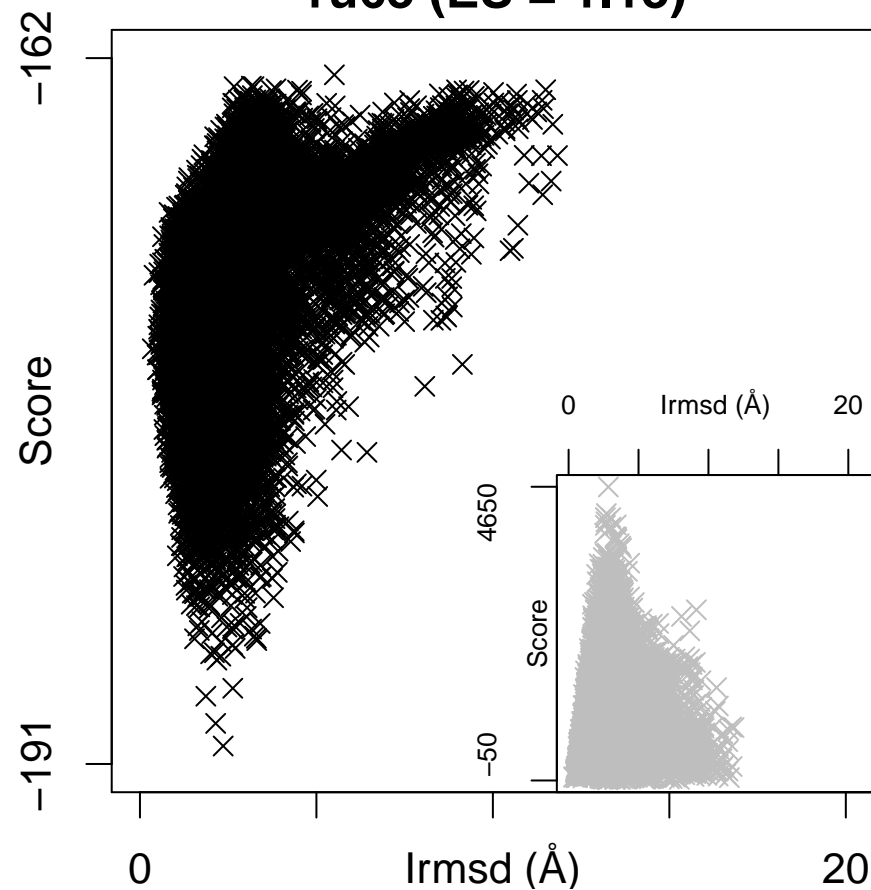**1t4l (ES = 1.64)**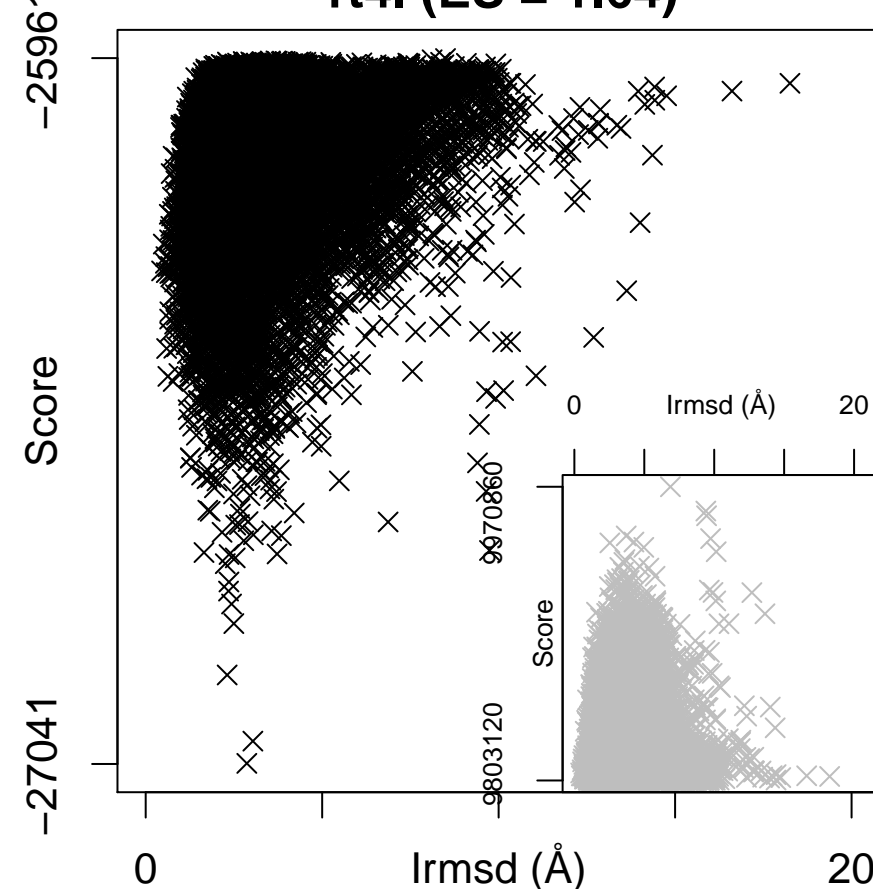**1ttt (ES = 3.25)**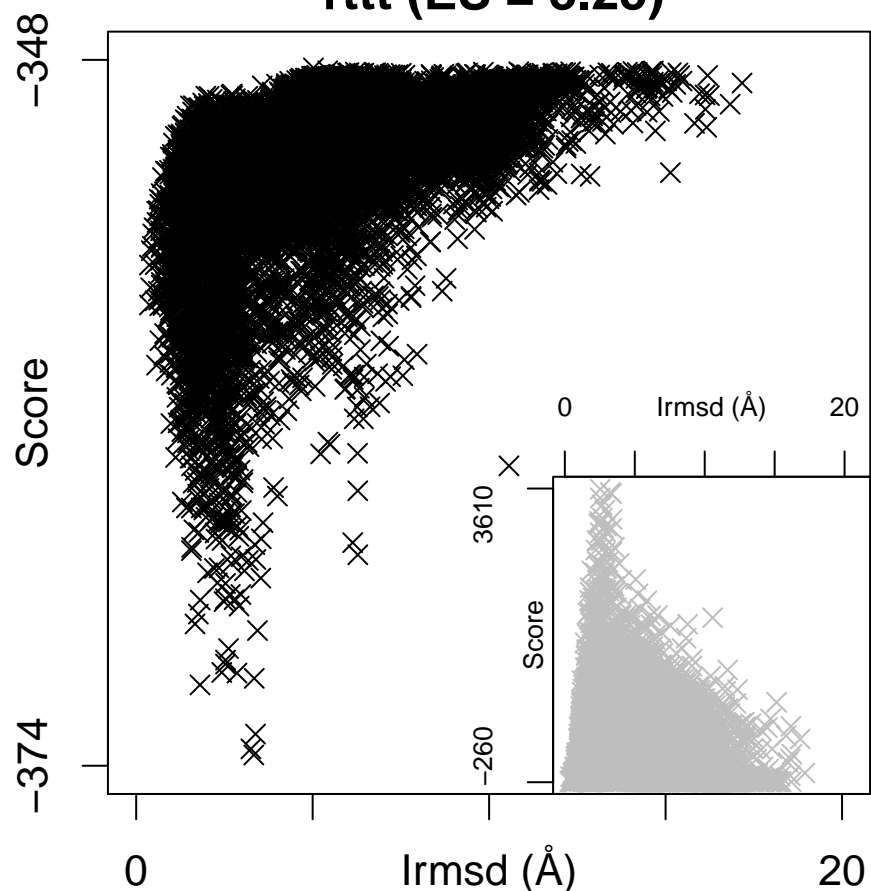**1wne (ES = 4.41)**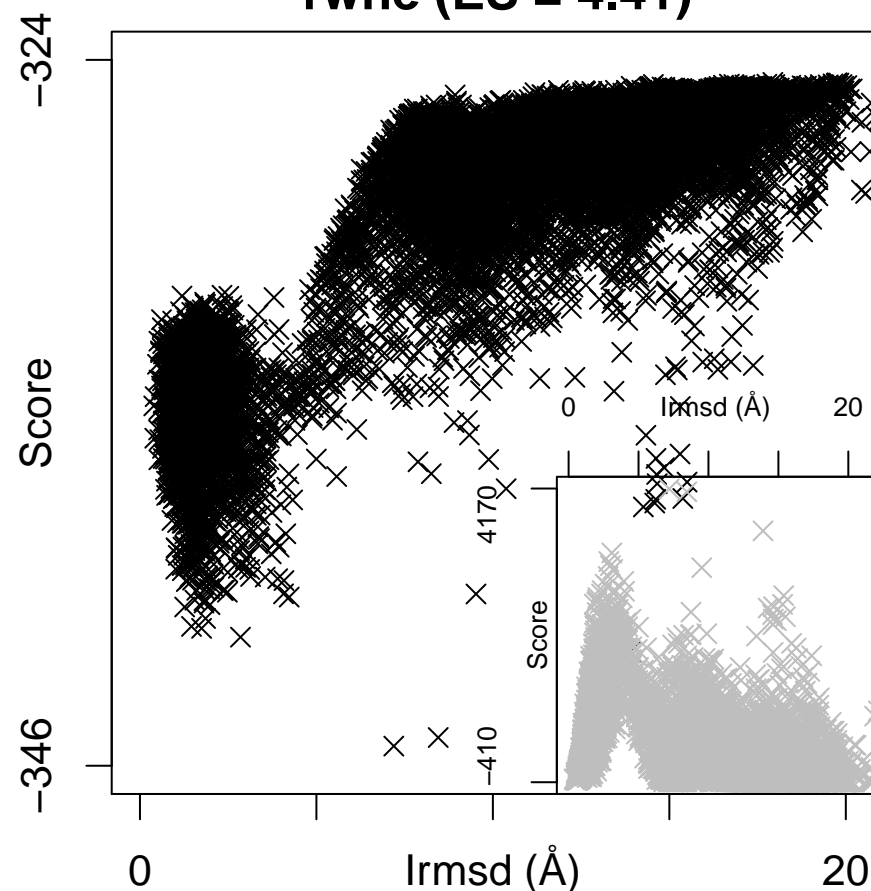**1zbi (ES = 2.95)**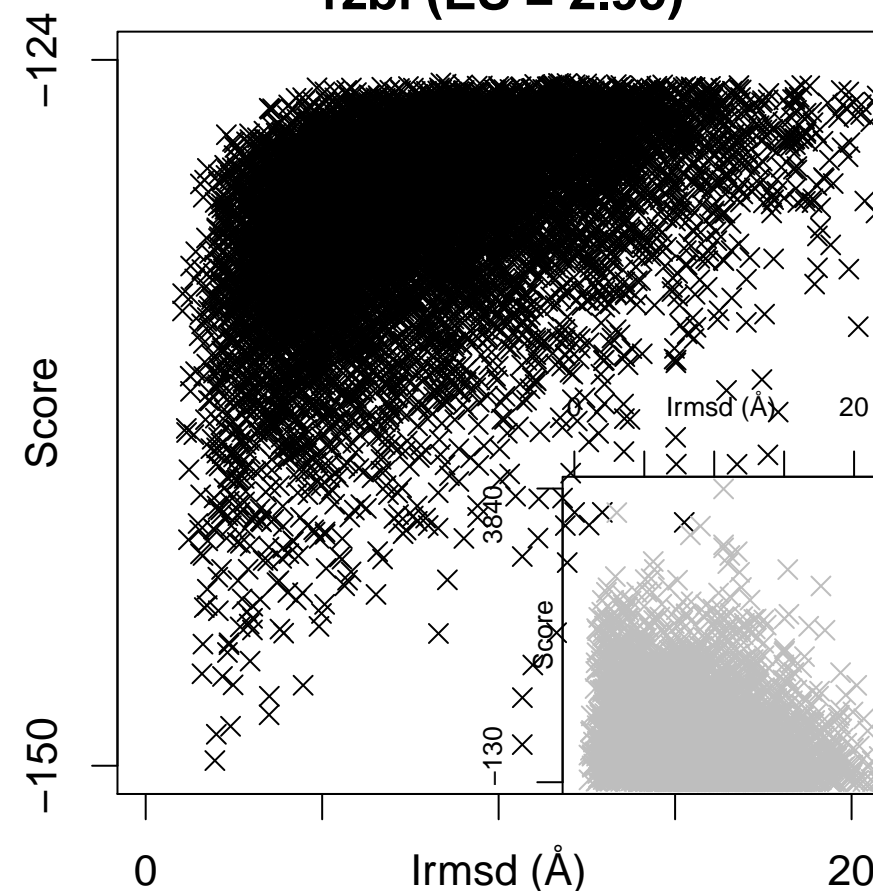**2ad9 (ES = 2.53)**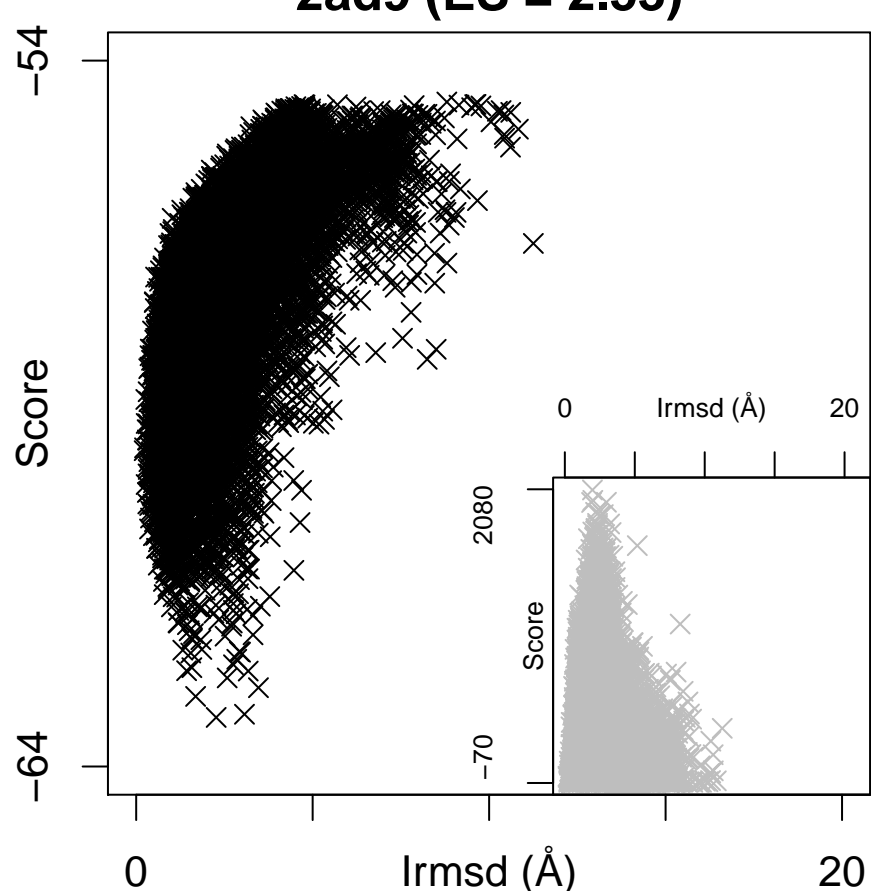**2adb (ES = 3.37)**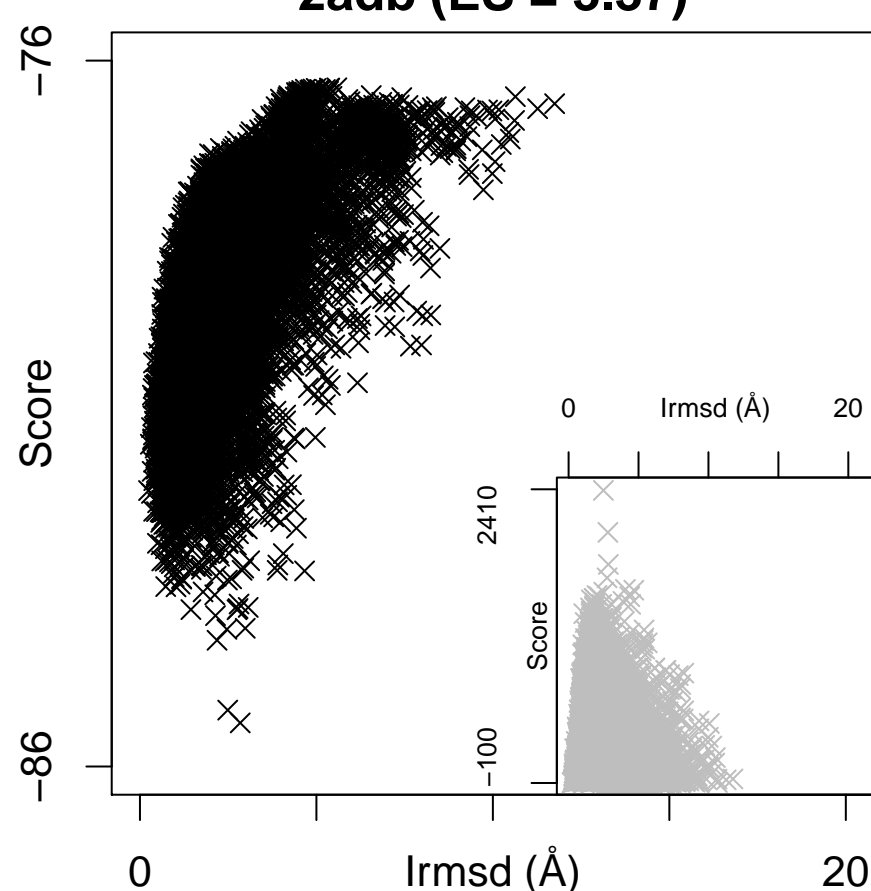**2adc (ES = 2.61)**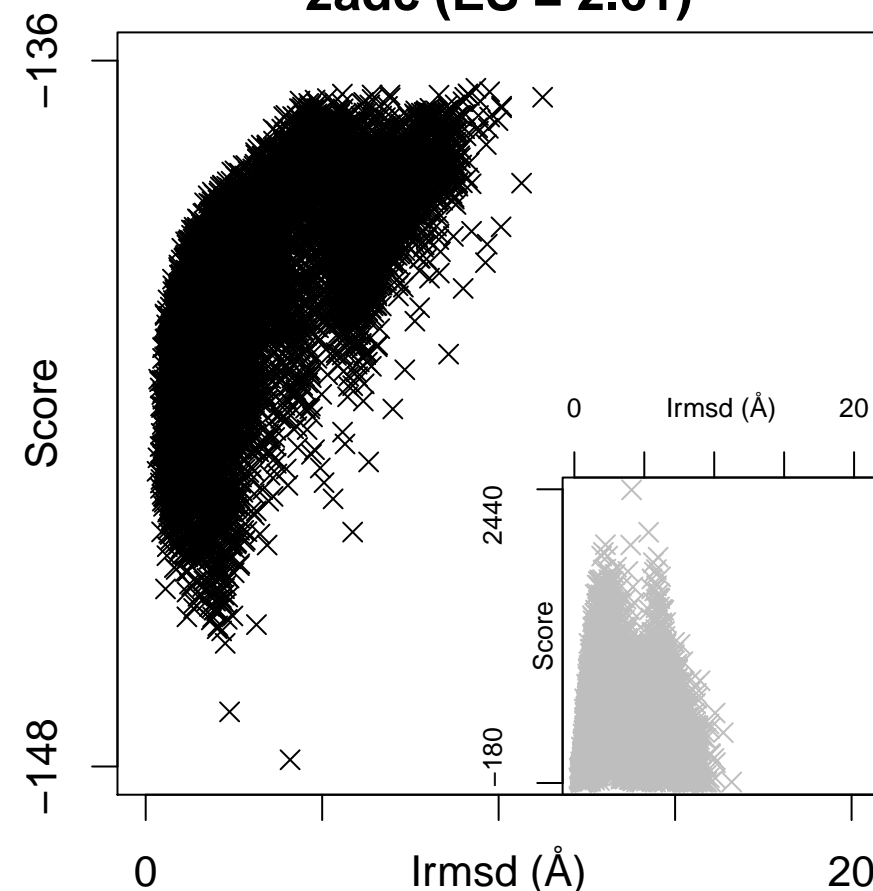

**2b6g (ES = 0.02)**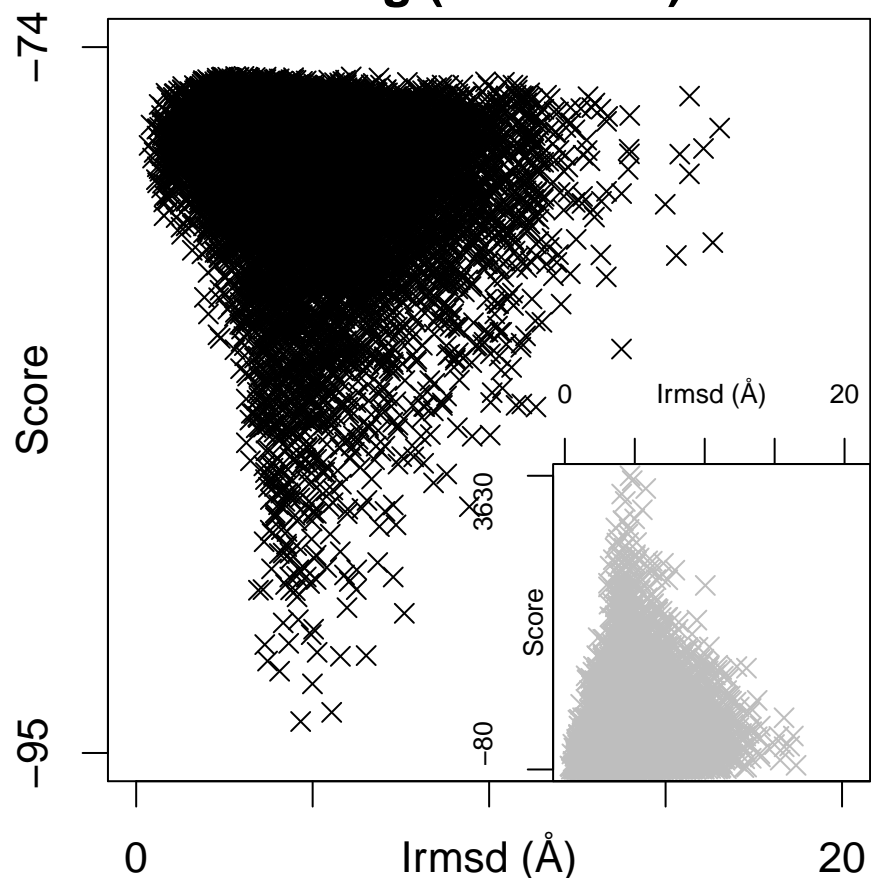**2c0b (ES = 2.98)**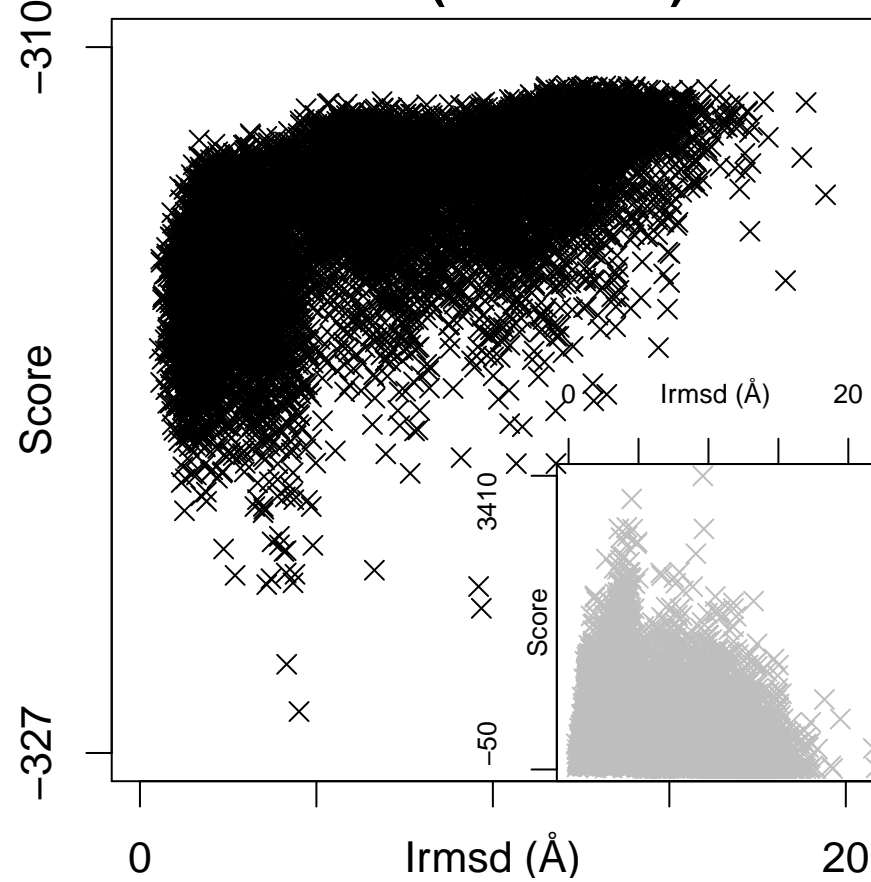**2dra (ES = 6.16)**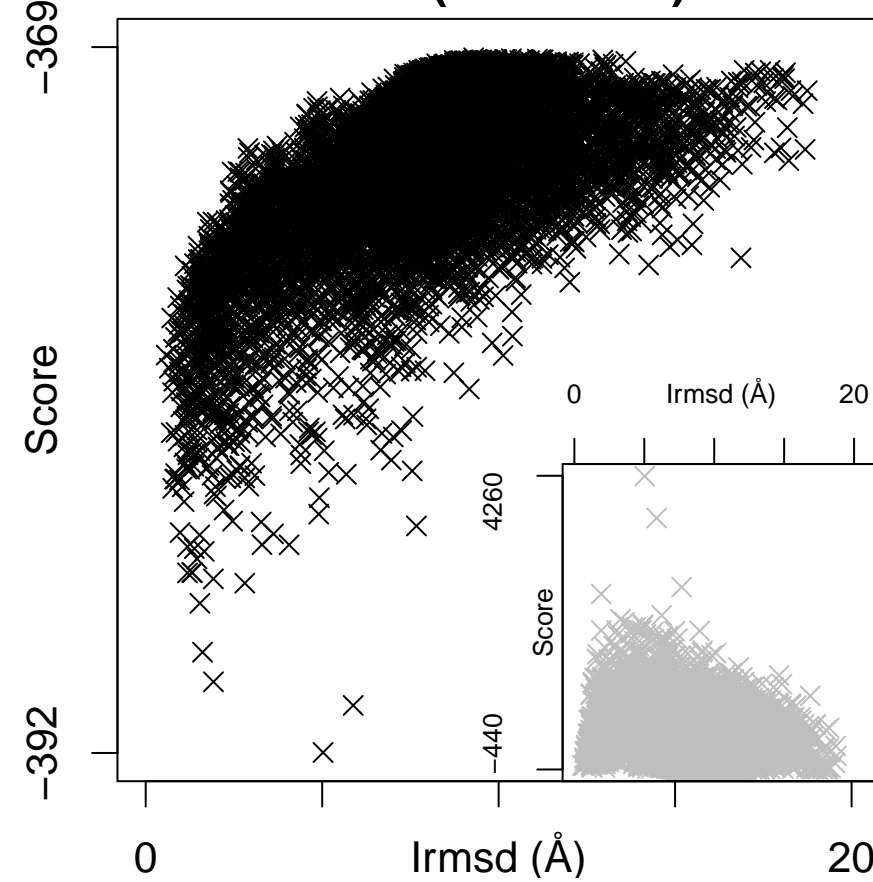**2err (ES = 2.48)**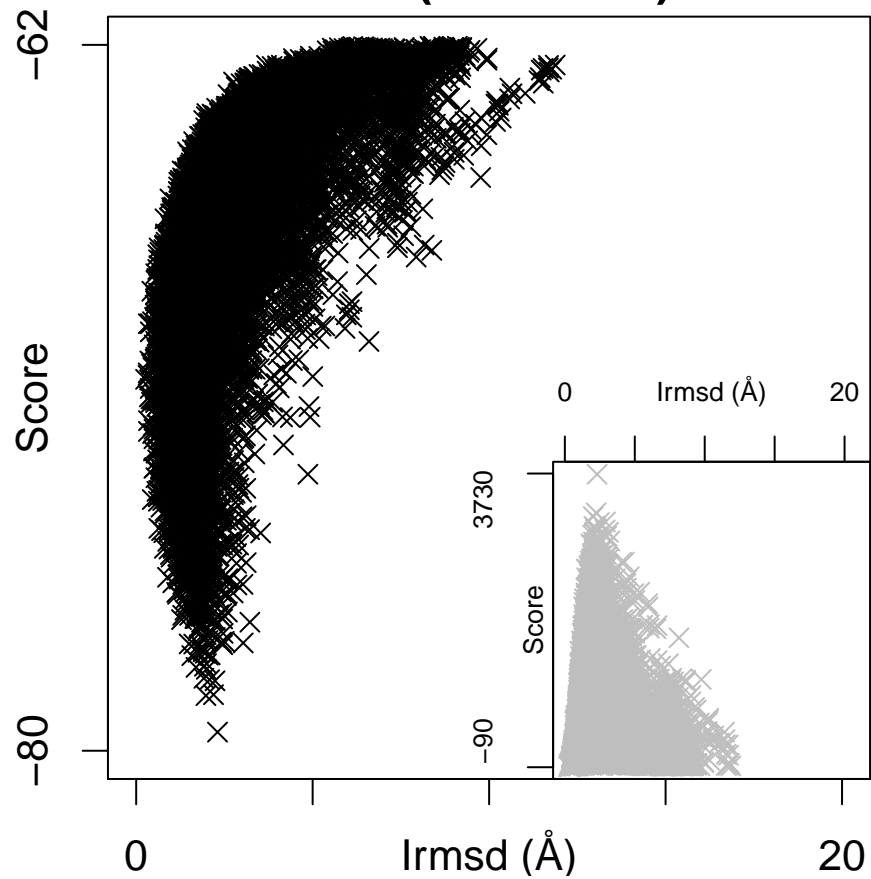**2ez6 (ES = 2.92)**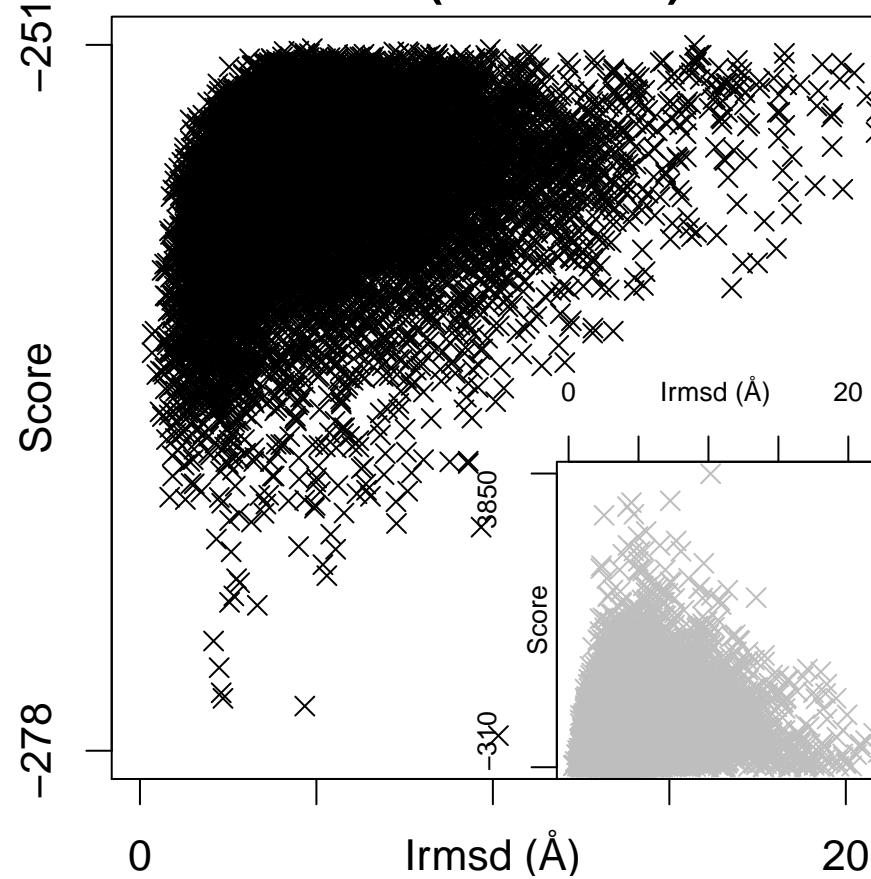**2hgh (ES = 1.03)**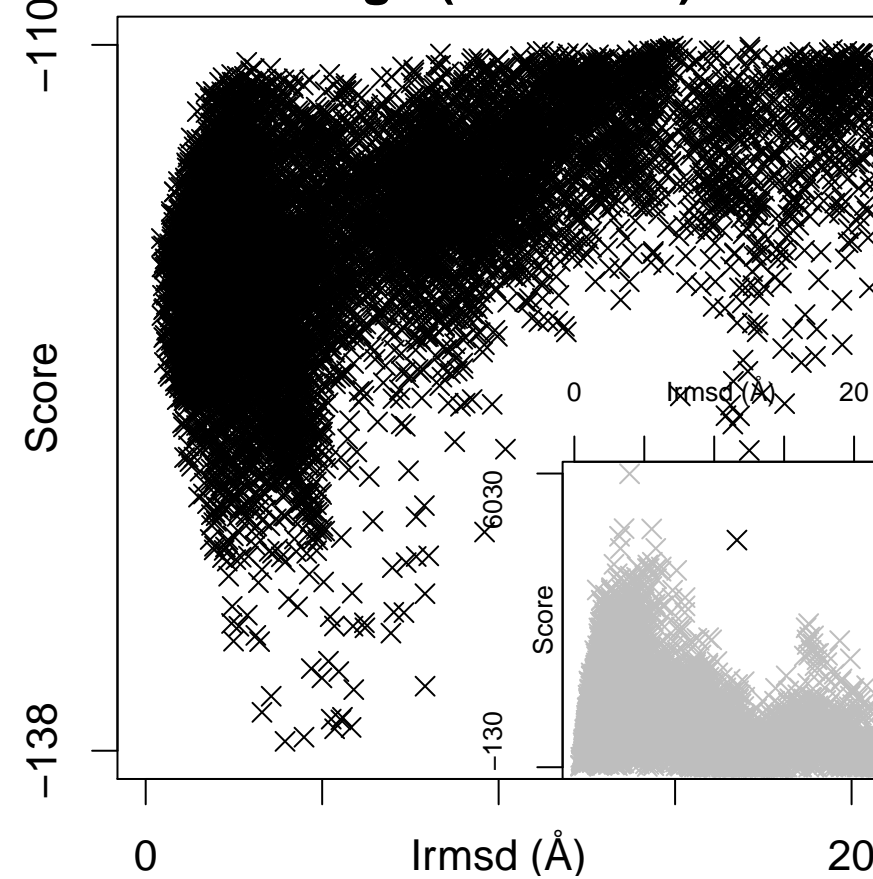**2i91 (ES = 7.35)**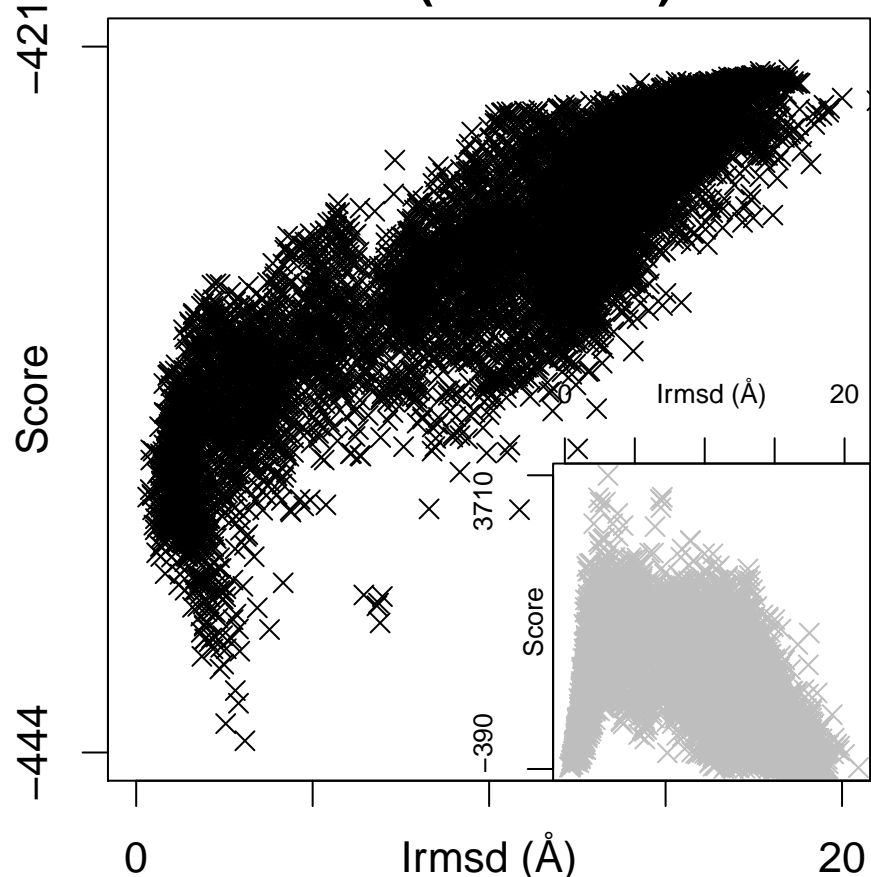**2ix1 (ES = 2.14)**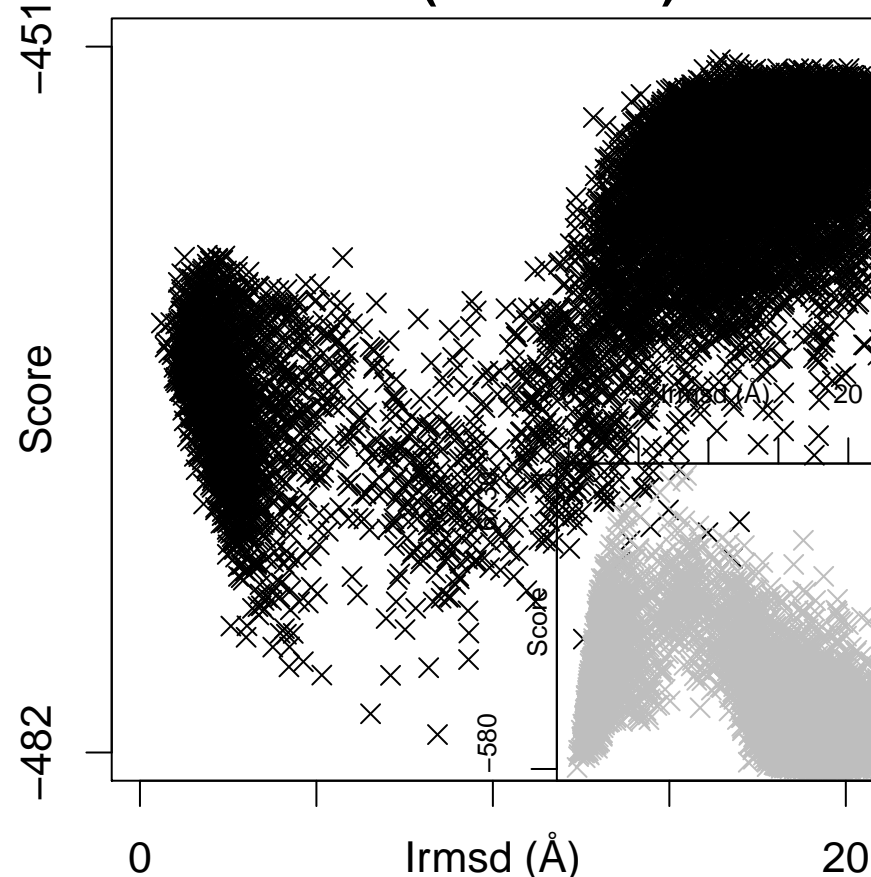**2py9 (ES = 2.95)**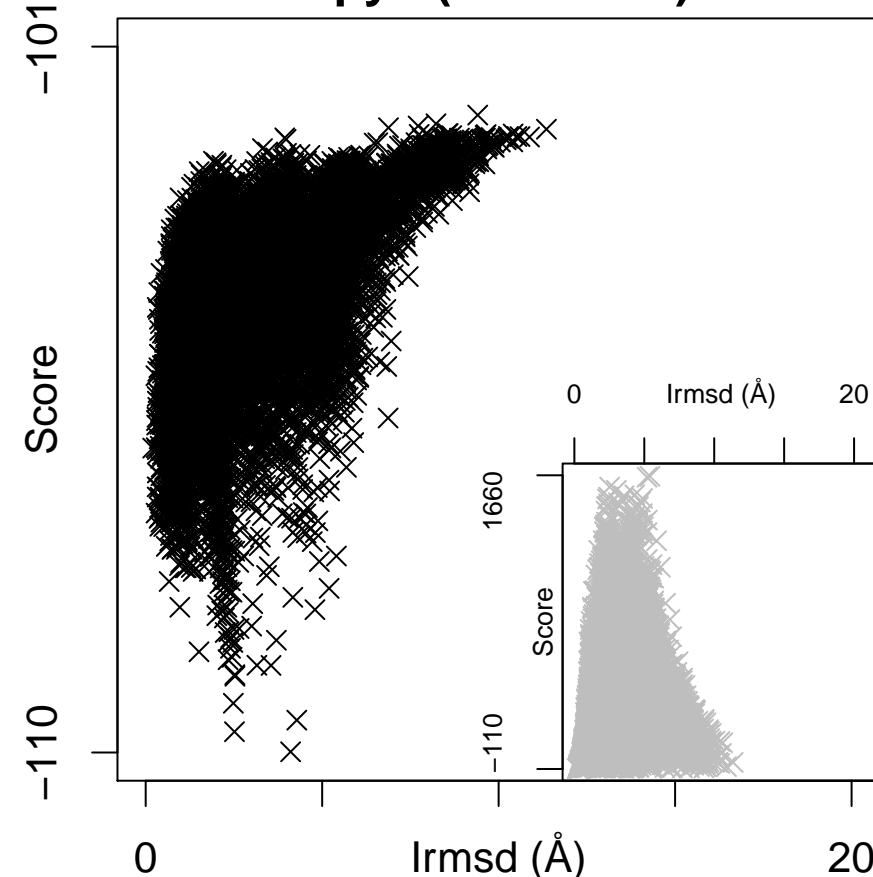

**3bo2 (ES = 2.73)**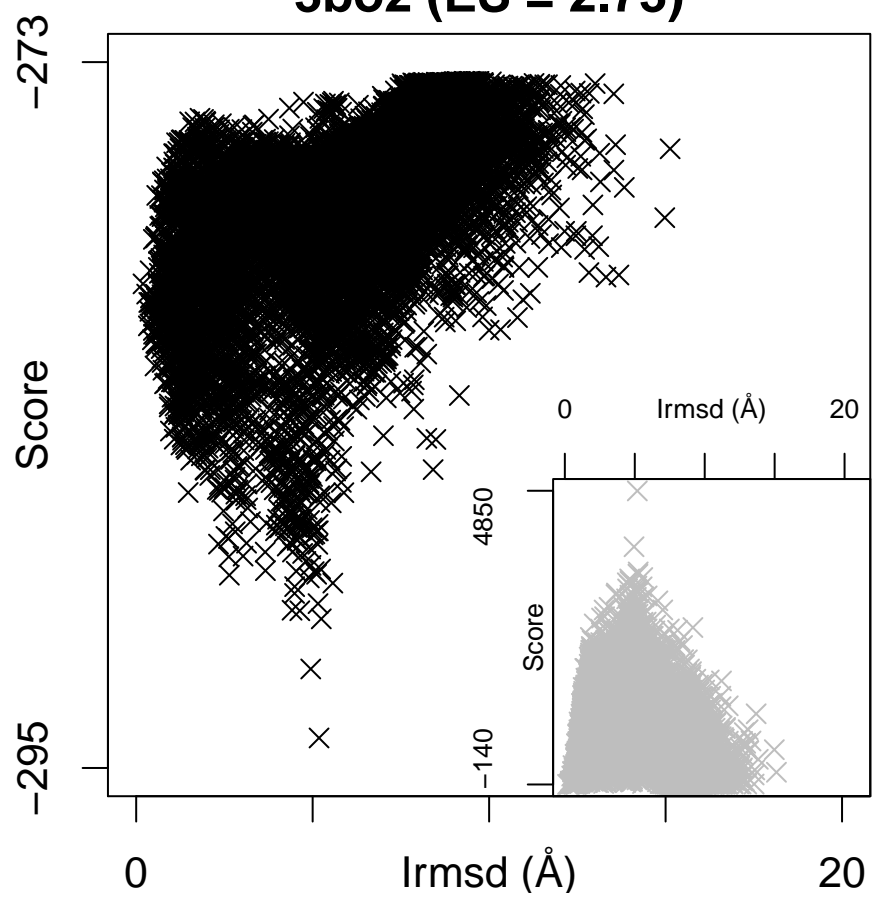**3bsb (ES = 1.55)**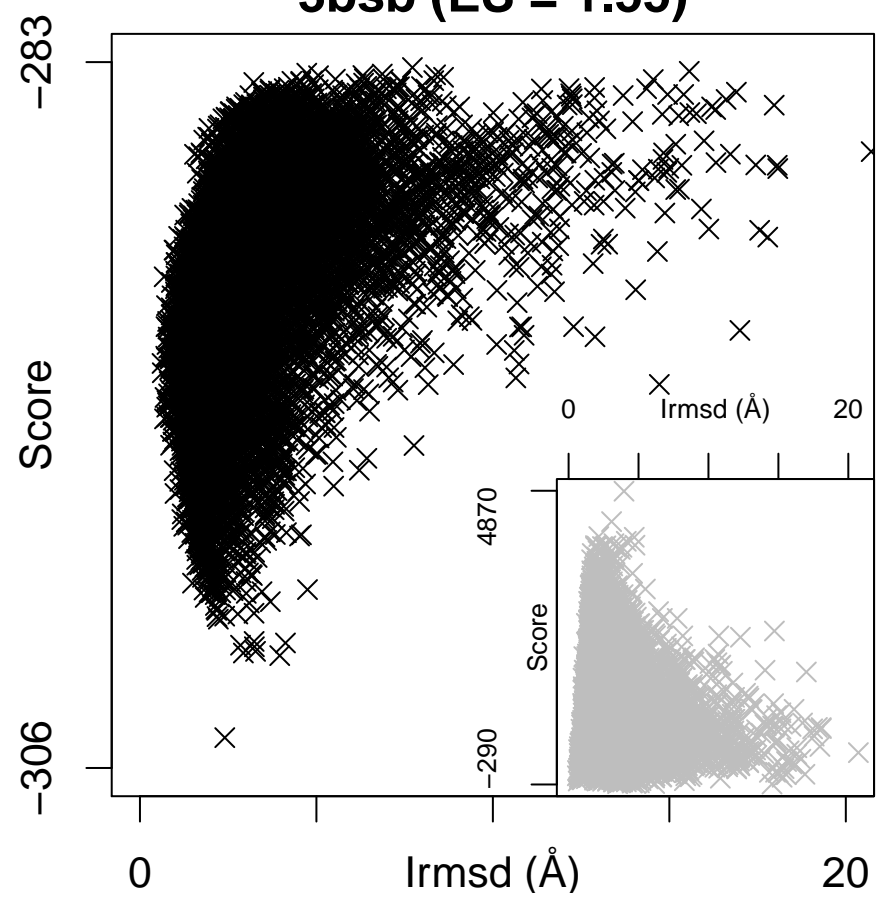**3bsx (ES = 1.2)**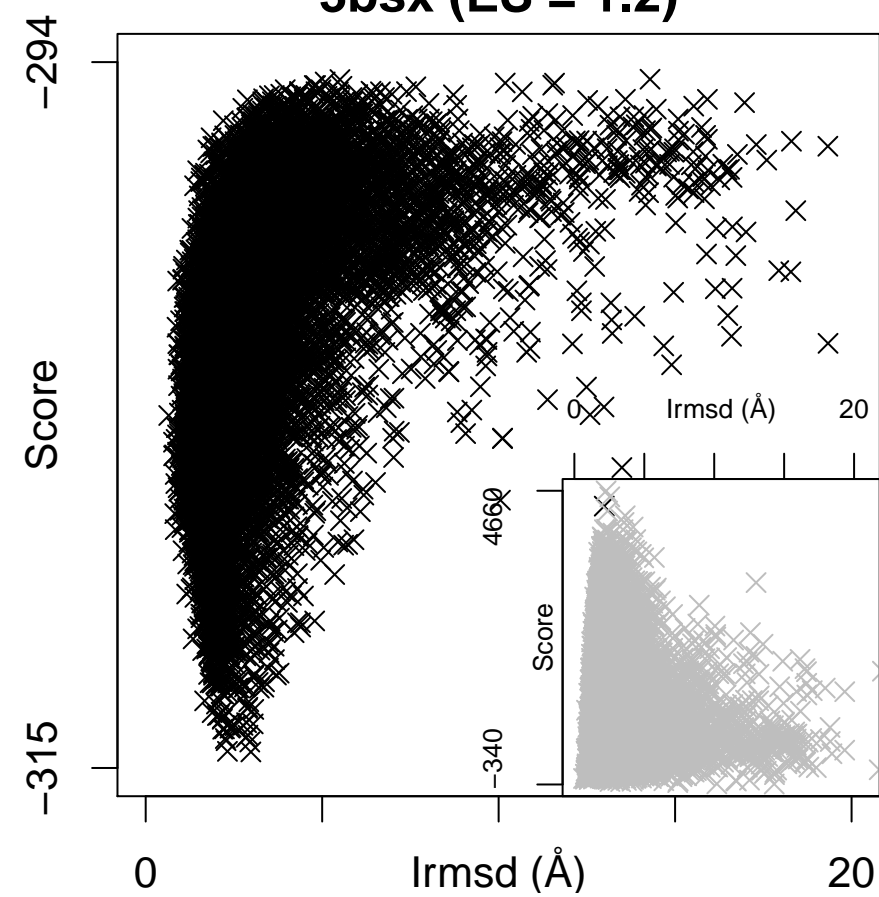**3bx2 (ES = 3.09)**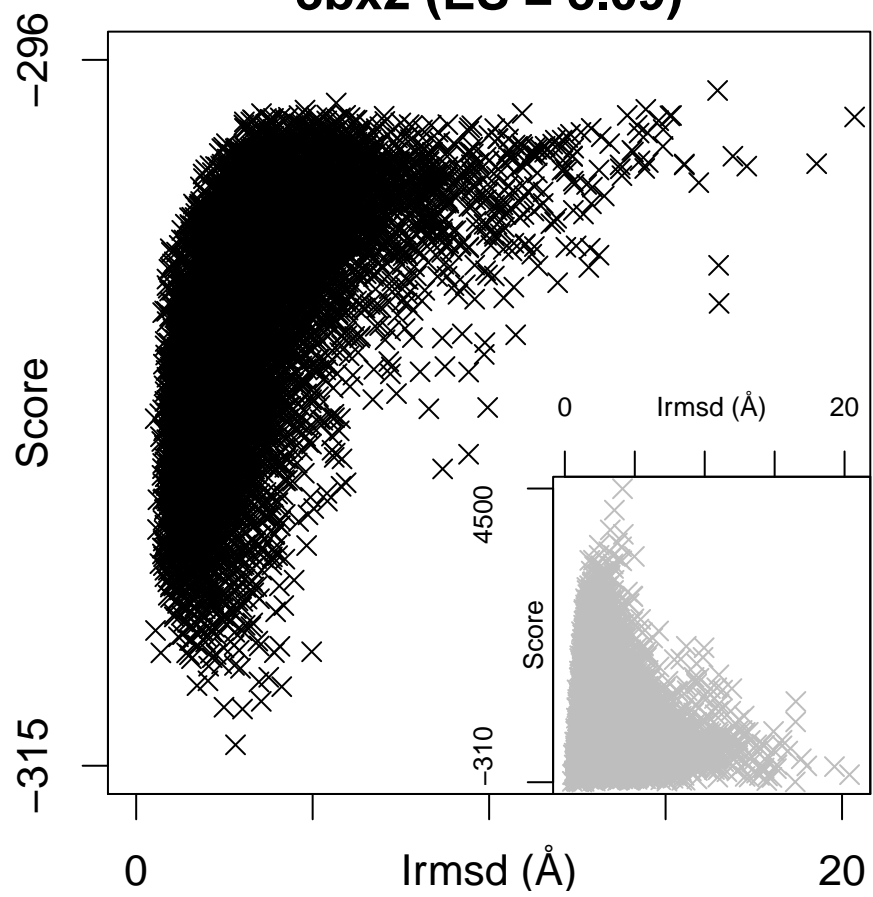

Supplement: pone.0108928.s003.pdf [file pone.0108928.s003.pdf]
