# Supplementary material for: Protein-RNA Complexes and Efficient Automatic Docking: Expanding RosettaDock Possibilities
Source: PubMed Central journal article supplement (PMC4182525; doi:10.1371/journal.pone.0108928), 2014-09-30

**1m5o (ES = 4.75)**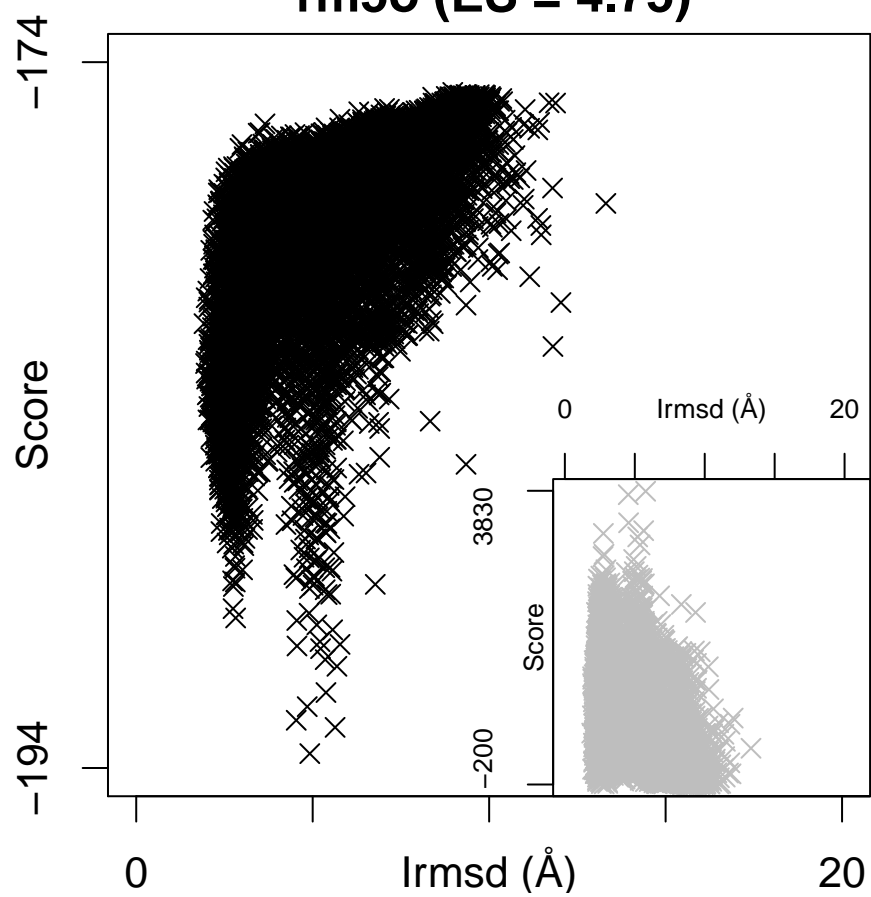**1qtq (ES = 6.09)**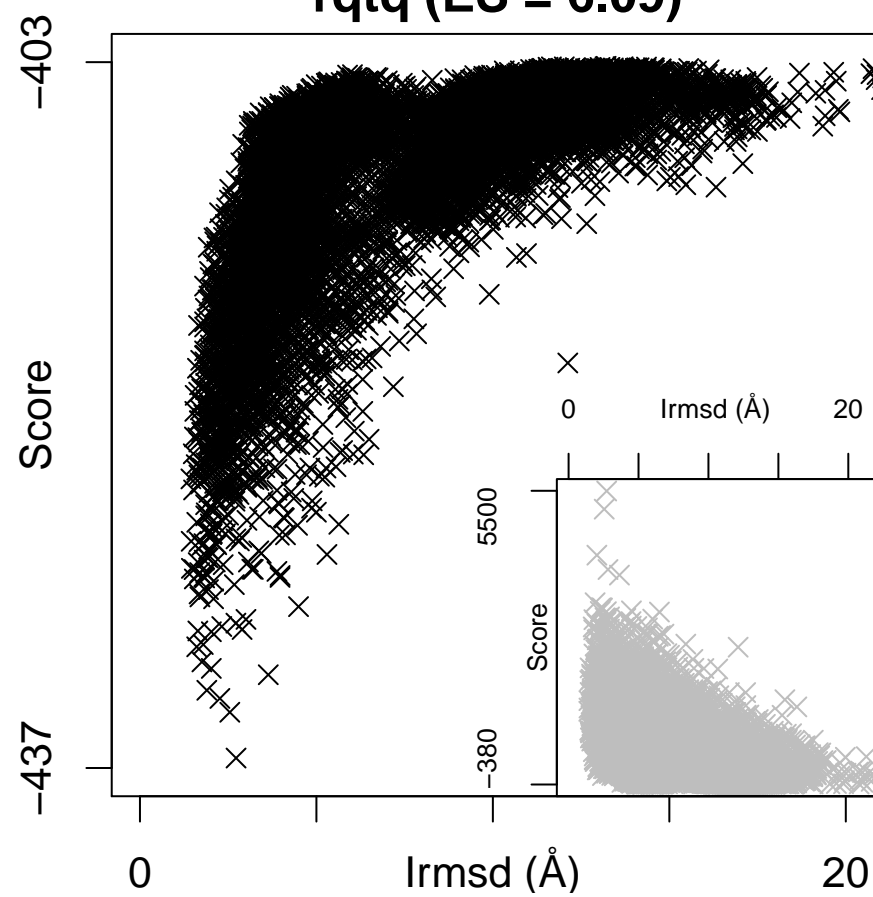**1wpu (ES = 3.15)**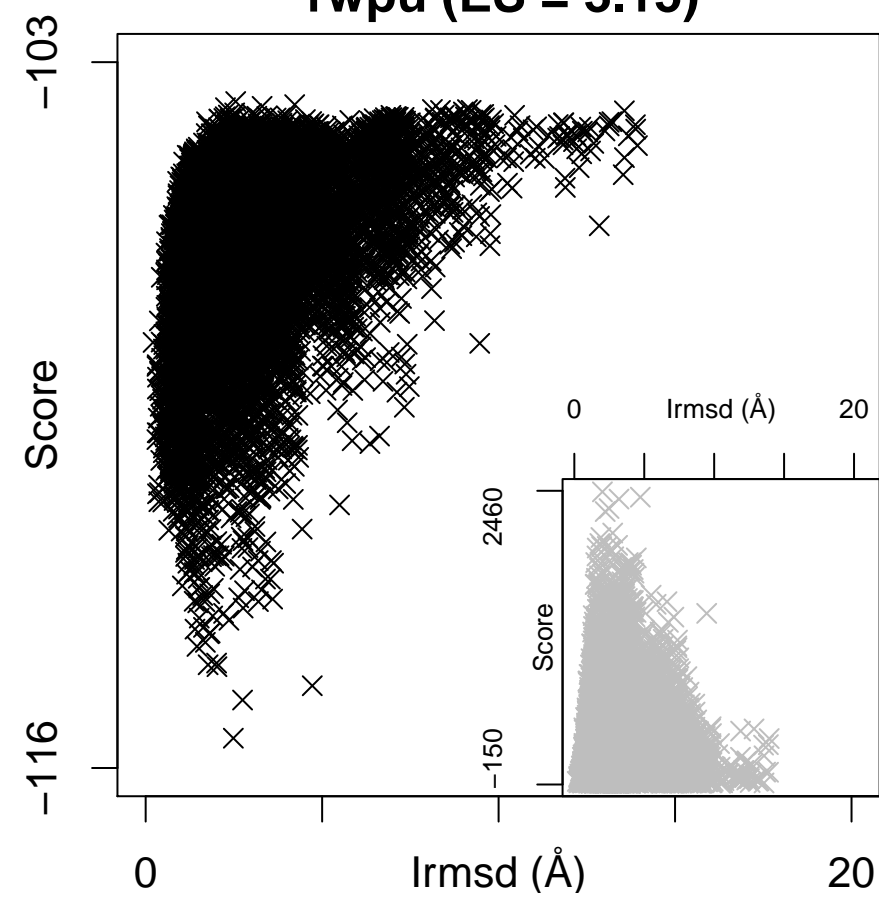**1yvp (ES = 0.2)**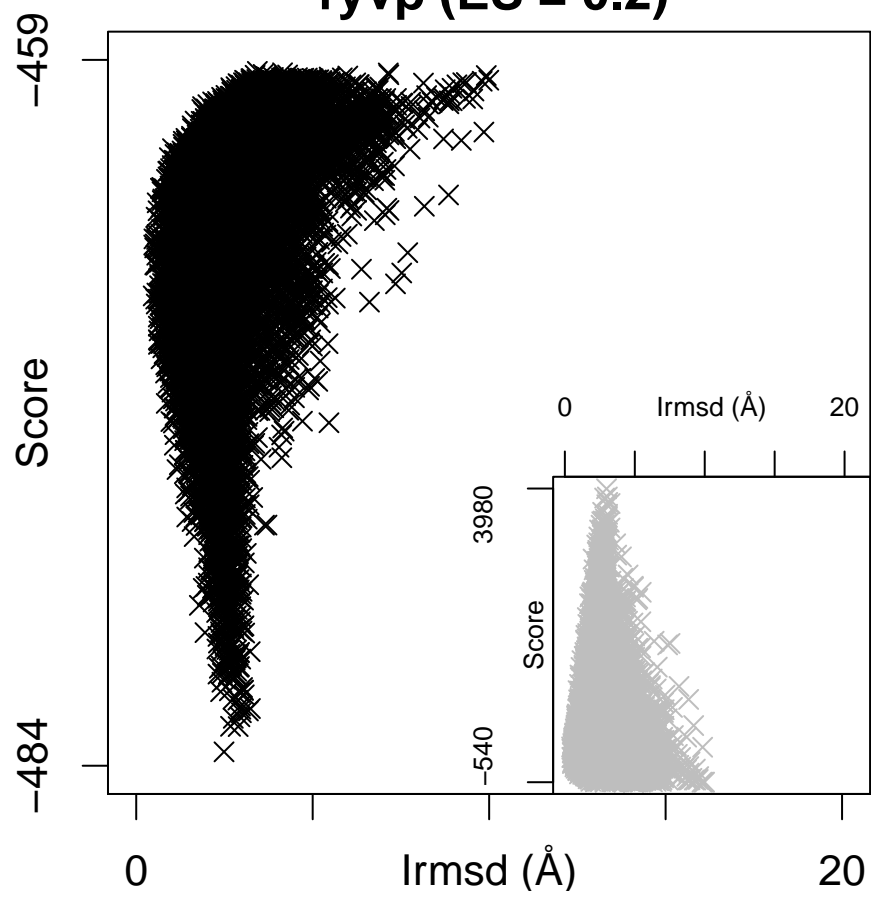**1zbh (ES = 0)**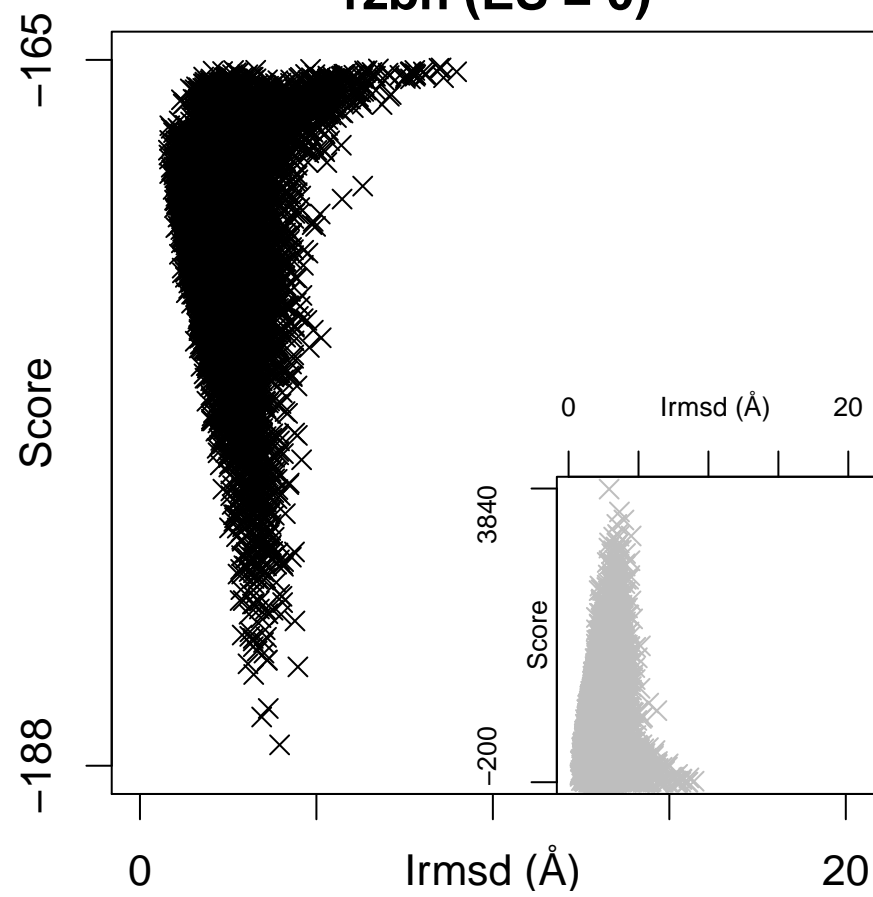**2ad9 (ES = 6.06)**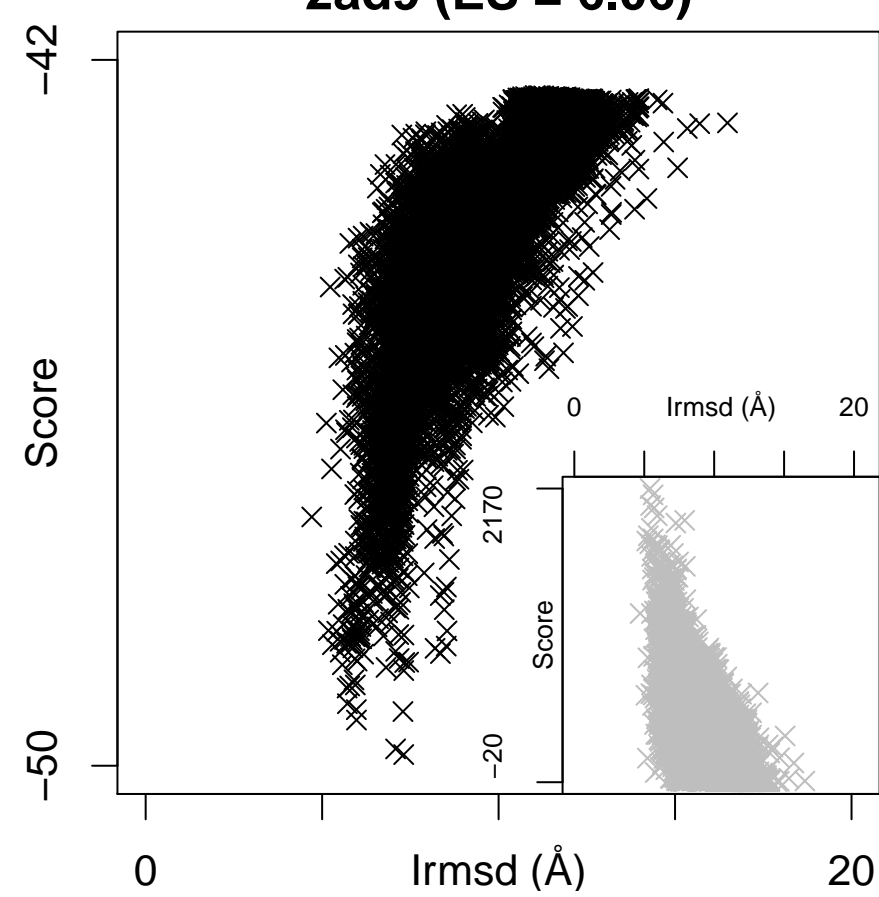

Supplement: pone.0108928.s004.pdf [file pone.0108928.s004.pdf]
