# Supplementary material for: Protein-RNA Complexes and Efficient Automatic Docking: Expanding RosettaDock Possibilities
Source: PubMed Central journal article supplement (PMC4182525; doi:10.1371/journal.pone.0108928), 2014-09-30
Supplement: pone.0108928.s006.pdf [file pone.0108928.s006.pdf]

| PDB Code | Protein                                                         | # amino acids | RNA                                            | # nucleic acids | Type  | Also in benchmark |
|----------|-----------------------------------------------------------------|---------------|------------------------------------------------|-----------------|-------|-------------------|
| 2zi0     | Tomato aspermy virus protein 2b                                 | 60            | siRNA                                          | 40              | dsRNA | -                 |
| 2gxb     | H. sapiens dsRNA-specific adenosine deaminase                   | 62            | dsRNA 5'-UCGCGCG-3' and 5'-CGCGCG-3'           | 13              | dsRNA | -                 |
| 1hq1     | E. coli signal recognition particle protein                     | 76            | 4.5S RNA domain IV                             | 49              | dsRNA | -                 |
| 2f8k     | S. cerevisiae VTS1 protein SAM domain                           | 84            | 5'-UAAUCUUUGACAGAU U-3'                        | 16              | dsRNA | II                |
| 1lng     | M. jannaschii signal recognition particle 19 kDa protein        | 87            | 7S.S signal recognition particle RNA           | 97              | dsRNA | -                 |
| 3egz     | H. sapiens U1 small nuclear ribonucleoprotein A                 | 91            | Tetracyclin haptamer and artificial riboswitch | 65              | dsRNA | -                 |
| 1dfu     | E. coli ribosomal protein L25                                   | 94            | 5S rRNA fragment                               | 38              | dsRNA | I & II            |
| 1jid     | H. sapiens signal recognition particle 19 kDa protein           | 114           | signal recognition particle RNA helix 6        | 29              | dsRNA | -                 |
| 2ppj     | E. coli selenocysteine-specific elongation factor selB          | 121           | SECIS RNA                                      | 23              | dsRNA | -                 |
| 1r9f     | Tomato bushy stunt virus core protein 19                        | 121           | siRNA                                          | 40              | dsRNA | -                 |
| 2czj     | T. thermophilus SsrA-binding protein                            | 122           | tmRNA tRNA domain                              | 62              | dsRNA | II                |
| 1wsu     | M. thermoacetica selenocystein-specific elongation factor       | 124           | 5'-GGCGUUGCCGGUCGG CAACGCC-3'                  | 22              | dsRNA | I & II            |
| 2bu1     | E. phage MS2 coat protein                                       | 129           | 5'-CAUGAGGAUUACCCA UG-3'                       | 17              | dsRNA | II                |
| 1di2     | X. laevis protein A dsRNA-binding domain                        | 129           | dsRNA 5'-GGCGCGGCC-3' tetramer                 | 40              | dsRNA | -                 |
| 2zko     | Influenza A virus non-structural protein 1 (NS1)                | 140           | dsRNA                                          | 42              | dsRNA | -                 |
| 2az0     | Flock house virus B2 protein                                    | 141           | dsRNA 5'-GCAUGGACGCGUCCA UGC-3' dimer          | 36              | dsRNA | I & II            |
| 1jbs     | A. restrictus restrictocin                                      | 142           | 29-mer sarcin/ricin domain RNA analog          | 29              | dsRNA | I                 |
| 1un6     | X. laevis transcription factor IIIA                             | 145           | 5S rRNA fragment                               | 61              | dsRNA | -                 |
| 1e8o     | H. sapiens signal recognition particle 9 kDa and 14 kDa protein | 149           | 7SL RNA                                        | 49              | dsRNA | -                 |
| 2anr     | H. sapiens neuro-oncological ventral antigen 1 (NOVA 1)         | 155           | 5'-CUCGCGAUCAGUCA CCCAAGCGAG-3'                | 25              | dsRNA | -                 |
| 1feu     | T. thermophilus 50S ribosomal protein L25                       | 185           | 5S rRNA fragment                               | 40              | dsRNA | -                 |
| 2i82     | E. coli ribosomal large subunit pseudouridine synthase A        | 217           | 5'-GAGGGGAAUGAAAAU CCCUC-3'                    | 21              | dsRNA | -                 |
| 1mzp     | S. acidocaldarius 50S ribosomal protein L1P                     | 217           | 23S rRNA fragment                              | 55              | dsRNA | -                 |
| 1zbh     | H. sapiens 3'-5' exonuclease ERI1                               | 224           | histone mRNA stem-loop                         | 16              | dsRNA | I                 |
| 2hw8     | T. thermophilus 50S ribosomal protein L1                        | 228           | mRNA                                           | 36              | dsRNA | I & II            |
| 2qux     | P. phage coat protein                                           | 244           | dsRNA                                          | 25              | dsRNA | II                |

|      |                                                                                                       |      |                                          |     |       |        |
|------|-------------------------------------------------------------------------------------------------------|------|------------------------------------------|-----|-------|--------|
| 3iab | <i>S. cerevisiae</i> ribonuclease P/MRP protein subunit POP6 and POP7                                 | 255  | Ribonuclease MRP RNA component P3 domain | 46  | dsRNA | -      |
| 3eqt | <i>H. sapiens</i> ATP-dependent RNA helicase DHX58                                                    | 269  | 5'-GCGCGCGC-3'                           | 8   | dsRNA | -      |
| 3dd2 | <i>H. sapiens</i> thrombine                                                                           | 288  | dsRNA                                    | 26  | dsRNA | -      |
| 2b3j | <i>S. aureus</i> tRNA adenosine deaminase (tAdA)                                                      | 302  | tRNA-ARG2 anticodon stem-loop            | 15  | dsRNA | -      |
| 1k8w | <i>E. coli</i> tRNA-PseudoU synthase B                                                                | 304  | T stem-loop RNA                          | 22  | dsRNA | I & II |
| 1r3e | <i>T. maritima</i> tRNA-PseudoU synthase B                                                            | 305  | tRNA-PseudoU T-arm                       | 51  | dsRNA | I & II |
| 10oa | <i>M. musculus</i> nuclear factor NF-kappa-B p105 subunit                                             | 313  | RNA aptamer                              | 29  | dsRNA | -      |
| 1vfg | <i>A. aeolicus</i> tRNA nucleotidyltransferase                                                        | 342  | Primer tRNA                              | 31  | dsRNA | -      |
| 2ozb | <i>H. sapiens</i> U4/U6 small nuclear ribonucleoprotein Prp31                                         | 365  | U4snRNA 5' stem-loop                     | 33  | dsRNA | -      |
| 3bt7 | <i>E. coli</i> tRNA (uracile-5)-methyltransferase                                                     | 369  | 19 nucleotide T-arm analogue             | 19  | dsRNA | -      |
| 2bgg | <i>A. fulgidus</i> piwi AF1318 protein                                                                | 395  | dsRNA 5'-UUCGACGC-3' and 5'-GUCGAAUU-3'  | 16  | dsRNA | I & II |
| 2r8s | <i>M. musculus</i> synthetic FAB                                                                      | 433  | P4-P6 RNA ribozyme domain                | 159 | dsRNA | -      |
| 2nug | <i>A. aeolicus</i> ribonuclease III                                                                   | 434  | dsRNA                                    | 44  | dsRNA | -      |
| 1t0k | <i>E. coli</i> maltose-binding periplasmic-protein and <i>S. cerevisiae</i> 60S ribosomal protein L30 | 462  | mRNA 3' consensus 5'-UGACC-3'            | 27  | dsRNA | II     |
| 2e9t | Foot-and-mouth disease virus RNA-dependent RNA polymerase                                             | 474  | dsRNA 5'-UAGGGCCC-3' and 5'-GGGCCCU-3'   | 15  | dsRNA | -      |
| 3bso | Norwalk virus RNA-dependent RNA polymerase                                                            | 479  | primer-template RNA                      | 16  | dsRNA | II     |
| 3l25 | Ebola virus polymerase cofactor VP35                                                                  | 492  | dsRNA 5'-CGCAUGCG-3' dimer               | 16  | dsRNA | -      |
| 1yvp | <i>X. laevis</i> 60 kDa SS-A Ro ribonucleoprotein                                                     | 529  | I & II strands of the Y RNA sequence     | 20  | dsRNA | I & II |
| 2w2h | Equine infectious anemia virus protein TAT and <i>E. caballus</i> cyclin-T1                           | 581  | TAR RNA                                  | 44  | dsRNA | -      |
| 2gjw | <i>A. fulgidus</i> tRNA-splicing endonuclease                                                         | 612  | dsRNA                                    | 37  | dsRNA | I & II |
| 3ciy | <i>M. musculus</i> toll-like receptor 3                                                               | 661  | dsRNA                                    | 92  | dsRNA | II     |
| 1q2r | <i>Z. mobilis</i> queuine tRNA ribosyltransferase                                                     | 748  | dsRNA 5'-AGCACGGCUNUAAACCGUGC-3' dimer   | 40  | dsRNA | II     |
| 3htx | <i>A. thaliana</i> RNA methyltransferase HEN1                                                         | 780  | dsRNA                                    | 44  | dsRNA | -      |
| 3snp | <i>O. cuniculus</i> cytoplasmic aconitate hydratase                                                   | 850  | Ferritin H IRE RNA                       | 30  | dsRNA | -      |
| 1tfw | <i>A. fulgidus</i> tRNA nucleotidyltransferase                                                        | 874  | Immature tRNA                            | 26  | dsRNA | -      |
| 3icq | <i>S. cerevisiae</i> GTP-binding nuclear protein GSP1/CNR1 and <i>S. pombe</i> exportin-T             | 1116 | dsRNA                                    | 62  | dsRNA | -      |
| 3a6p | <i>H. sapiens</i> exportin-5                                                                          | 1242 | pre-miRNA                                | 46  | dsRNA | -      |
| 1n35 | <i>M. orthoreovirus</i> minor core protein lambda 3                                                   | 1264 | dsRNA 5'-GGGGG-3' and 5'-UAGCCCCC-3'     | 13  | dsRNA | I      |

|      |                                                                                                           |      |                                          |    |       |        |
|------|-----------------------------------------------------------------------------------------------------------|------|------------------------------------------|----|-------|--------|
| 2f8s | A. aeolicus argonaute protein                                                                             | 1408 | dsRNA 5'-AGACAGCAUUAUAGCUGUCUUU-3' dimer | 44 | dsRNA | I      |
| 1m8v | P. abyssi putative snRNP sm-like protein                                                                  | 72   | 5'-UUUUUU-3'                             | 6  | ssRNA | I & II |
| 1sds | M. jannaschii 50S ribosomal protein L7Ae                                                                  | 112  | Archeal box H/ACA sRNA K-turn            | 15 | ssRNA | I      |
| 2a8v | E. coli rho-dependent transcription termination factor RNA-binding domain                                 | 118  | 5'-CCC-3'                                | 3  | ssRNA | I      |
| 1si3 | H. sapiens eukaryotic translation initiation factor 2C 1                                                  | 120  | 5'-CGUGACUCU-3'                          | 9  | ssRNA | -      |
| 3d2s | H. sapiens muscleblind-like protein 1 (MBNL1)                                                             | 135  | 5'-GCUGU-3'                              | 5  | ssRNA | -      |
| 1gtf | G. staerothermophilus TRP RNA-binding attenuation protein                                                 | 142  | 5'-GAGU-3'                               | 4  | ssRNA | -      |
| 1wpu | B. subtilis hut operon positive regulatory protein                                                        | 148  | 5'-UUGAGUU-3'                            | 7  | ssRNA | I & II |
| 1fxl | P. encephalomyelitis antigen hud                                                                          | 167  | 5'-UUUUUUUUU-3'                          | 9  | ssRNA | -      |
| 2voo | H. sapiens lupus LA protein                                                                               | 179  | 5'-UUU-3'                                | 3  | ssRNA | -      |
| 3gib | E. coli protein Hfq                                                                                       | 191  | 5'-AAAAAAAAA-3'                          | 9  | ssRNA | -      |
| 2asb | M. tuberculosis transcription elongation protein nusA                                                     | 226  | 5'-GAACUCAAUAG-3'                        | 11 | ssRNA | I & II |
| 1av6 | Vaccinia cap-specific mRNA methyltransferase VP39                                                         | 290  | M7G Capped RNA 5'-GAAAAA-3'              | 7  | ssRNA | -      |
| 1knz | S. rotavirus nonstructural RNA-binding protein 34                                                         | 292  | mRNA 3' consensus 5'-UGACC-3'            | 5  | ssRNA | -      |
| 2gje | T. brucei mRNA-binding protein                                                                            | 292  | Guide-RNA fragment                       | 18 | ssRNA | II     |
| 3iev | A. aeolicus GTP-binding protein                                                                           | 302  | 16S rRNA 3' end                          | 11 | ssRNA | -      |
| 1m8x | H. sapiens pumilio 1 homology domain                                                                      | 341  | 5'-UUGUAU-3'                             | 8  | ssRNA | -      |
| 2wj8 | Human respiratory syncytial virus nucleoprotein                                                           | 374  | 5'-CCCCCC-3'                             | 7  | ssRNA | -      |
| 3fht | H. sapiens ATP-dependent RNA helicase DDX19B                                                              | 392  | 5'-UUUUUU-3'                             | 6  | ssRNA | -      |
| 3k62 | C. elegans Fem-3 mRNA-binding factor 2                                                                    | 400  | 5'-UGUGUUAUC-3'                          | 9  | ssRNA | -      |
| 2gtt | Rabies virus nucleoprotein                                                                                | 401  | ssRNA                                    | 17 | ssRNA | -      |
| 2gic | Vesicular stomatitis Indiana virus nucleocapsid protein                                                   | 416  | ssRNA fragment                           | 15 | ssRNA | I & II |
| 2bh2 | E. coli 23S ribosomal RNA (uracil-5)-methyltransferase RUMA                                               | 419  | 23S rRNA fragment                        | 29 | ssRNA | I & II |
| 2jlv | Dengue virus serine protease subunit NS3                                                                  | 451  | 5'-AGACUAA-3'                            | 7  | ssRNA | -      |
| 2bx2 | E. coli ribonuclease E                                                                                    | 500  | 5'-UUUACAGUAUUUGU-3'                     | 14 | ssRNA | -      |
| 2po1 | P. abyssi probable exosome complex exonuclease                                                            | 503  | 5'-AAAAAAA-3'                            | 7  | ssRNA | -      |
| 3i5x | S. cerevisiae ATP-dependent RNA helicase MSS116                                                           | 509  | 5'-UUUUUUUUUU-3'                         | 10 | ssRNA | -      |
| 1ddl | Desmodium yellow mottle tymovirus                                                                         | 551  | 5'-UUUUUU-3'                             | 7  | ssRNA | -      |
| 1pgl | Bean pod mottle virus                                                                                     | 555  | 5'-AGUCUC-3'                             | 6  | ssRNA | -      |
| 1uvj | P. phage P2 protein                                                                                       | 664  | 5'-UUCC-3'                               | 4  | ssRNA | -      |
| 3ex7 | H. sapiens CASC3 and mago nashi homolog and RNA-binding protein 8 and eukaryotic initiation factor 4A-III | 687  | 5'-UUUUUU-3'                             | 6  | ssRNA | -      |

|      |                                                                                                                          |      |                                        |    |       |         |
|------|--------------------------------------------------------------------------------------------------------------------------|------|----------------------------------------|----|-------|---------|
| 2vnu | <i>S. cerevisiae</i> exosome complex exonuclease RRP44                                                                   | 694  | 5'-AAAAAAAAA-3'                        | 9  | ssRNA | -       |
| 2z2q | Flock house virus capsid protein                                                                                         | 980  | Flock house virus genomic RNA          | 12 | ssRNA | -       |
| 2r7r | Simian rotavirus RNA-dependent RNA polymerase                                                                            | 1073 | 5'-UGUGACC-3'                          | 7  | ssRNA | II      |
| 1j1u | <i>M. jannaschii</i> tRNA-TYR synthetase                                                                                 | 300  | tRNA-TYR                               | 74 | tRNA  | I & II  |
| 3foz | <i>E. coli</i> isopentenyl-tRNA transferase                                                                              | 303  | tRNA-PHE                               | 69 | tRNA  | -       |
| 2fk6 | <i>B. subtilis</i> ribonuclease Z                                                                                        | 307  | tRNA-THR                               | 53 | tRNA  | I & II  |
| 2fmt | <i>E. coli</i> tRNA-FMET formyltransferase                                                                               | 314  | Formyl-methionyl-tRNA-FMET2            | 77 | tRNA  | I & II  |
| 2zzm | <i>M. jannaschii</i> uncharacterized protein MJ0883                                                                      | 329  | tRNA-LEU                               | 84 | tRNA  | -       |
| 2der | <i>E. coli</i> tRNA-specific 2-thiouridylase mnmA                                                                        | 348  | tRNA-GLU                               | 74 | tRNA  | -       |
| 3eph | <i>S. cerevisiae</i> tRNA isopentenyltransferase                                                                         | 402  | tRNA                                   | 69 | tRNA  | -       |
| 1b23 | <i>T. aquaticus</i> elongation factor EF-                                                                                | 405  | <i>E. coli</i> tRNA-CYS                | 74 | tRNA  | II      |
| 1h3e | <i>T. thermophilus</i> tRNA-TYR synthetase                                                                               | 427  | Wild type tRNA-TYR (GUA)               | 84 | tRNA  | II      |
| 1u0b | <i>E. coli</i> tRNA-CYS                                                                                                  | 461  | tRNA-CYS                               | 74 | tRNA  | I & II  |
| 2ct8 | <i>A. aeolicus</i> tRNA-MET synthetase                                                                                   | 465  | tRNA-MET                               | 74 | tRNA  | -       |
| 1n78 | <i>T. thermophilus</i> tRNA-GLU synthetase                                                                               | 468  | tRNA-GLU                               | 75 | tRNA  | I & II  |
| 2d6f | <i>M. thermautotrophicus</i> tRNA-GLN amidotransferase                                                                   | 485  | tRNA-GLN                               | 72 | tRNA  | -       |
| 1asy | Yeast tRNA-ASP synthetase                                                                                                | 490  | tRNA-ASP                               | 75 | tRNA  | I & II  |
| 3hax | <i>P. furiosus</i> probable tRNA-PseudoU synthase B and ribosome biogenesis protein Nop10 and 50S ribosomal protein L7Ae | 503  | H/ACA RNA                              | 74 | tRNA  | -       |
| 2nqp | <i>E. coli</i> tRNA-PseudoU synthase A                                                                                   | 528  | tRNA-LEU                               | 71 | tRNA  | -       |
| 1qtq | <i>E. coli</i> tRNA-GLN synthetase                                                                                       | 529  | tRNA-GLN II                            | 74 | tRNA  | I & II  |
| 2zni | <i>D. hafniense</i> tRNA-PYL synthetase                                                                                  | 558  | tRNA-PYL                               | 72 | tRNA  | -       |
| 1c0a | <i>E. coli</i> tRNA-ASP synthetase                                                                                       | 585  | tRNA-ASP                               | 77 | tRNA  | I & II  |
| 1f7u | <i>S. cerevisiae</i> tRNA-ARG synthetase                                                                                 | 607  | tRNA-ARG                               | 76 | tRNA  | I & II  |
| 2zue | <i>P. horikoshii</i> tRNA-ARG synthetase                                                                                 | 628  | tRNA-ARG                               | 76 | tRNA  | -       |
| 1qf6 | <i>E. coli</i> tRNA-THR synthetase                                                                                       | 641  | tRNA-THR                               | 76 | tRNA  | I       |
| 2azx | <i>H. sapiens</i> tRNA-TRP synthetase                                                                                    | 778  | tRNA-TRP                               | 72 | tRNA  | I & II  |
| 1ser | <i>T. thermophilus</i> tRNA-SER synthetase                                                                               | 793  | tRNA-SER                               | 65 | tRNA  | I & II  |
| 2bte | <i>T. thermophilus</i> aminoacyl-tRNA synthetase                                                                         | 877  | tRNA-LEU transcript with anticodon CAG | 78 | tRNA  | I & II  |
| 3hl2 | <i>H. sapiens</i> O-phosphoseryl-tRNA-SEC selenium transferase                                                           | 886  | tRNA-SEC                               | 82 | tRNA  | -       |
| 1ffy | <i>S. aureus</i> tRNA-ILE synthetase                                                                                     | 917  | tRNA-ILE                               | 75 | tRNA  | -       |
| 1h4s | <i>T. thermophilus</i> tRNA-PRO synthetase                                                                               | 946  | tRNA-PRO (CGG)                         | 67 | tRNA  | I & II  |
| 1wz2 | <i>P. horikoshii</i> tRNA-LEU synthetase                                                                                 | 948  | tRNA-LEU                               | 88 | tRNA  | -       |
| 2du3 | <i>A. fulgidus</i> O-phosphoseryl-tRNA synthetase                                                                        | 1001 | tRNA-CYS                               | 71 | tRNA  | -       |
| 2iy5 | <i>T. thermophilus</i> tRNA-PHE synthetase                                                                               | 1117 | tRNA-PHE                               | 76 | tRNA  | II(1ey) |
| 1j2b | <i>P. horikoshii</i> archaeosine tRNA-GUA transglycosylase                                                               | 1152 | tRNA-VAL                               | 77 | tRNA  | II      |
