# Supplementary material for: Protein-RNA Complexes and Efficient Automatic Docking: Expanding RosettaDock Possibilities
Source: PubMed Central journal article supplement (PMC4182525; doi:10.1371/journal.pone.0108928), 2014-09-30
Supplement: pone.0108928.s007.pdf [file pone.0108928.s007.pdf]

| PDB Code | Originating Benchmark | Difficulty | Unbound protein | Description                                              | # amino acids | Unbound RNA | RNA description                                    | # nucleic acids | Type  |
|----------|-----------------------|------------|-----------------|----------------------------------------------------------|---------------|-------------|----------------------------------------------------|-----------------|-------|
| 2b6g     | I                     | R          | 2d3d            | S. cerevisiae VTS1 protein SAM domain                    | 81            | 2b7g        | 5'-GGAGGCUCUGGCAGCUUUC-3'                          | 19              | dsRNA |
| 1zbi     | I                     | R          | 1zbf            | B. halodurans Ribonuclease H-related protein             | 135           | -           | RNA-DNA hybrid                                     | 24              | dsRNA |
| 2ez6     | I                     | R          | 1jfz            | A. aeolicus ribonuclease III                             | 218           | -           | dsRNA                                              | 56              | dsRNA |
| 1ttt     | I                     | R          | 1eft            | T. aquaticus elongation factor EF-TU                     | 405           | 4tna        | Yeast tRNA-PHE                                     | 76              | tRNA  |
| 1msw     | I                     | X          | 1aro            | E. phage DNA-directed T7 RNA polymerase                  | 863           | -           | mRNA                                               | 47              | ssRNA |
| 1ec6     | II                    | R          | 1dtj            | H. sapiens neuro-oncological ventral antigen 2 (NOVA 2)  | 87            | -           | dsRNA                                              | 20              | dsRNA |
| 1t4l     | II                    | R          | 1t4o            | S. cerevisiae ribonuclease III                           | 90            | -           | snRNA 47 precursor 5' terminal hairpin             | 32              | dsRNA |
| 3bo2     | II                    | R          | 1nu4            | H. sapiens U1 small nuclear ribonucleoprotein A          | 95            | -           | Group I intron P9 and mRNA                         | 221             | dsRNA |
| 1g1x     | II                    | R          | 1ris            | T. thermophilus 30S ribosomal protein S6                 | 98            | -           | 16S rRNA fragment                                  | 84              | dsRNA |
| 1jbr     | II                    | R          | 1aqz            | A. restrictus restrictocin                               | 149           | -           | 31-mer SRD RNA analog                              | 31              | dsRNA |
| 1u63     | II                    | R          | 1l2a            | M. jannaschii 50S ribosomal protein L1P                  | 214           | -           | mRNA                                               | 49              | dsRNA |
| 1kog     | II                    | R          | 1evl            | E. coli tRNA-THR synthetase                              | 401           | -           | tRNA-THR synthetase mRNA operator essential domain | 37              | dsRNA |
| 1c9s     | II                    | R          | 1qaw            | G. staerothermopilus TRP RNA-binding attenuation protein | 67            | -           | 5'-GAUGAGA-3'                                      | 7               | ssRNA |
| 3bsb     | II                    | R          | 1m8z            | H. sapiens pumilio 1 homology domain                     | 341           | -           | 5'-UUUAAUGUU-3'                                    | 9               | ssRNA |
| 3bsx     | II                    | R          | 1m8z            | H. sapiens pumilio 1 homology domain                     | 341           | -           | 5'-UUGUAAUAAU-3'                                   | 10              | ssRNA |

|      |    |   |      |                                                            |     |      |                                             |     |       |
|------|----|---|------|------------------------------------------------------------|-----|------|---------------------------------------------|-----|-------|
| 1kq2 | II | R | 1kq1 | S. aureus host factor protein for Q beta                   | 365 | -    | 5'-AUUUUUG-3'                               | 7   | ssRNA |
| 2i91 | II | R | 1yvr | S. laevis 60 kDa SS-A Ro ribonucleoprotein                 | 526 | -    | misfolded RNA fragment                      | 23  | ssRNA |
| 1efw | II | R | 1l0w | T. thermophilus tRNA-ASP synthetase                        | 580 | 1c0a | tRNA-ASP                                    | 73  | tRNA  |
| 1hc8 | II | S | 1foy | G. staerothermopilus ribosomal protein L11                 | 74  | -    | 23S rRNA fragment                           | 57  | dsRNA |
| 1dk1 | II | S | 2fkx | T. thermophilus 30S ribosomal protein S15                  | 86  | -    | 30S rRNA fragment                           | 57  | dsRNA |
| 1mfq | II | S | 1qb2 | H. sapiens signal recognition particle 54 kDa protein      | 108 | 1l9a | 7S RNA of Human signal recognition particle | 128 | dsRNA |
| 1mms | II | S | 2k3f | T. maritima ribosomal protein L11                          | 133 | -    | 23S rRNA fragment                           | 58  | dsRNA |
| 2err | II | S | 2cq3 | H. sapiens ataxin-2-binding protein 1 (Fox 1)              | 88  | -    | 5'-UGCAUGU-3'                               | 7   | ssRNA |
| 2ad9 | II | S | 1sjq | H. sapiens polypyrimidine tract-binding protein RBD1       | 98  | -    | 5'-CUCUCU-3'                                | 6   | ssRNA |
| 2adb | II | S | 1sjr | H. sapiens polypyrimidine tract-binding protein RBD2       | 127 | -    | 5'-CUCUCU-3'                                | 6   | ssRNA |
| 2py9 | II | S | 2jzx | H. sapiens poly(rC)-binding protein 2                      | 141 | -    | Human telomeric RNA                         | 12  | ssRNA |
| 2adc | II | S | 2evz | H. sapiens polypyrimidine tract-binding protein RBD3 and 4 | 208 | -    | 5'-CUCUCU-3'                                | 6   | ssRNA |
| 3bx2 | II | S | 1m8z | H. sapiens pumilio 1 homology domain                       | 328 | -    | 5'-UGUAUUAUUA-3'                            | 9   | ssRNA |
| 1ekz | II | X | 1stu | D. melanogaster maternal effect protein                    | 76  | -    | RNA hairpin                                 | 30  | dsRNA |
| 2hgh | II | X | 2j7j | S. laevis transcription factor IIIA                        | 87  | -    | 5S rRNA fragment                            | 55  | dsRNA |
| 1hvu | II | X | 2vg5 | Human immunodeficiency virus HIV1 reverse transcriptase    | 954 | -    | RNA pseudoknot                              | 30  | dsRNA |

|      |                 |   |      |                                                           |     |      |                                            |     |       |
|------|-----------------|---|------|-----------------------------------------------------------|-----|------|--------------------------------------------|-----|-------|
| 1b7f | II              | X | 3sxl | D. melanogaster SXL-lethal protein                        | 167 | -    | 5'-GUUGUUUUUUUUU-3'                        | 12  | ssRNA |
| 2c0b | II              | X | 2vmk | E. coli ribonuclease E                                    | 488 | -    | 5'-UUUACAGUAAU-3'                          | 11  | ssRNA |
| 1ob2 | II              | X | 1efc | E. coli elongation factor EF-TU                           | 393 | 1ehz | tRNA-PHE                                   | 76  | tRNA  |
| 1m5o | II (&I)         | R | 1nu4 | H. sapiens U1 small nuclear ribonucleoprotein A           | 92  | -    | RNA substrate and RNA hairpin ribozyme     | 113 | dsRNA |
| 1wne | II (&I)         | R | 1u09 | Foot-and-mouth disease virus RNA-dependent RNA polymerase | 476 | -    | dsRNA 5'-CAUGGGCC-3' and 5'-GGCCC-3' dimer | 13  | dsRNA |
| 1m8w | II (&I)         | R | 1mz8 | H. sapiens pumilio 1 homology domain                      | 340 | -    | 5'-UUGUAUUAU-3'                            | 8   | ssRNA |
| 2ix1 | II (&I)         | R | 2id0 | E. coli exoribonuclease II                                | 643 | -    | 5'-AAAAAAAAAAAAA-3'                        | 13  | ssRNA |
| 1e7k | II (&I)         | S | 2jnb | H. sapiens 15.5 kDa RNA-binding protein                   | 125 | -    | 5'-GCCAAUGAGGCCGAGGC-3'                    | 17  | dsRNA |
| 2dra | II (&I as 2drb) | R | 1r89 | A. fulgidus CCA-adding enzyme                             | 437 | 1vfg | tRNA mini DCC                              | 34  | dsRNA |
