# Supplementary material for: Protein-RNA Complexes and Efficient Automatic Docking: Expanding RosettaDock Possibilities
Source: PubMed Central journal article supplement (PMC4182525; doi:10.1371/journal.pone.0108928), 2014-09-30
Supplement: pone.0108928.s008.pdf [file pone.0108928.s008.pdf]

| PDB code | Enrichment |       | Top10   |       |          | Top100  |       | # near native | AUC     |        |
|----------|------------|-------|---------|-------|----------|---------|-------|---------------|---------|--------|
|          | Default    | Roger | Default | Roger | Expected | Default | Roger |               | Default | Roger  |
| 1asy     | 0.49       | 3.69  | 7       | 8     | 7.195    | 28      | 95    | 7195          | 42.95%  | 74.00% |
| 1av6     | 3.15       | 1.53  | 5       | 10    | 8.815    | 77      | 100   | 8815          | 38.17%  | 88.26% |
| 1b23     | 1.47       | 2.87  | 4       | 10    | 5.037    | 4       | 99    | 5037          | 39.38%  | 81.24% |
| 1c0a     | 0.46       | 5.89  | 1       | 10    | 2.568    | 11      | 99    | 2568          | 30.41%  | 91.29% |
| 1ddl     | 0.52       | 2.64  | 2       | 3     | 2.789    | 18      | 35    | 2789          | 47.79%  | 64.22% |
| 1dfu     | 2.11       | 5.07  | 4       | 10    | 9.240    | 47      | 100   | 9240          | 27.89%  | 93.34% |
| 1di2     | 0.59       | 4.05  | 10      | 10    | 7.553    | 99      | 98    | 7553          | 40.52%  | 90.53% |
| 1e8o     | 1.18       | 2.08  | 6       | 2     | 3.376    | 24      | 37    | 3376          | 44.09%  | 62.81% |
| 1f7u     | 0.17       | 4.46  | 4       | 10    | 4.105    | 4       | 94    | 4105          | 20.72%  | 88.76% |
| 1feu     | 1.16       | 1.72  | 4       | 10    | 9.081    | 65      | 99    | 9081          | 33.69%  | 81.13% |
| 1ffy     | 0.02       | 7.09  | 0       | 10    | 3.121    | 0       | 100   | 3121          | 42.32%  | 93.05% |
| 1fxl     | 0.08       | 6.26  | 0       | 10    | 5.104    | 0       | 100   | 5104          | 17.98%  | 78.67% |
| 1gtf     | 4.28       | 1.61  | 10      | 10    | 9.628    | 97      | 100   | 9628          | 49.39%  | 71.97% |
| 1h3e     | 0.41       | 5.02  | 0       | 10    | 5.918    | 11      | 100   | 5918          | 35.43%  | 76.62% |
| 1h4s     | 0.81       | 1.90  | 1       | 4     | 1.190    | 2       | 34    | 1190          | 41.88%  | 62.91% |
| 1hq1     | 1.43       | 2.42  | 6       | 3     | 2.624    | 31      | 40    | 2624          | 57.27%  | 67.35% |
| 1j1u     | 1.56       | 1.40  | 10      | 9     | 8.331    | 96      | 92    | 8331          | 53.03%  | 66.67% |
| 1j2b     | 0.02       | 6.25  | 0       | 10    | 1.317    | 0       | 100   | 1317          | 13.26%  | 86.67% |
| 1jbs     | 0.58       | 0.79  | 0       | 0     | 2.528    | 1       | 5     | 2528          | 44.14%  | 60.90% |
| 1jid     | 2.52       | 0.05  | 2       | 10    | 9.357    | 63      | 98    | 9357          | 37.07%  | 65.01% |
| 1k8w     | 0.59       | 7.73  | 1       | 10    | 3.916    | 5       | 100   | 3916          | 35.28%  | 93.78% |
| 1knz     | 0.00       | 5.68  | 0       | 10    | 3.110    | 0       | 100   | 3110          | 14.91%  | 92.51% |
| 1lng     | 2.74       | 3.91  | 6       | 10    | 7.299    | 70      | 95    | 7299          | 60.99%  | 65.15% |
| 1m8v     | 0.85       | 1.70  | 10      | 3     | 7.017    | 90      | 51    | 7017          | 43.97%  | 53.79% |
| 1m8x     | 1.68       | 4.61  | 7       | 10    | 8.413    | 86      | 100   | 8413          | 42.64%  | 75.23% |
| 1mzp     | 0.76       | 3.15  | 0       | 6     | 1.592    | 11      | 51    | 1592          | 40.37%  | 71.41% |
| 1n35     | 0.10       | 7.27  | 0       | 8     | 0.732    | 0       | 85    | 732           | 33.80%  | 98.59% |
| 1n78     | 0.33       | 3.67  | 0       | 10    | 4.390    | 0       | 98    | 4390          | 29.73%  | 92.34% |
| 1ooa     | 3.45       | 2.56  | 6       | 10    | 8.662    | 75      | 100   | 8662          | 43.74%  | 90.53% |
| 1pgl     | 3.13       | 0.00  | 10      | 9     | 9.344    | 80      | 98    | 9344          | 24.48%  | 85.09% |
| 1q2r     | 0.00       | 6.33  | 0       | 10    | 4.585    | 0       | 100   | 4585          | 23.71%  | 81.80% |
| 1qf6     | 0.09       | 7.30  | 0       | 10    | 1.154    | 0       | 99    | 1154          | 23.09%  | 90.18% |
| 1qtq     | 0.05       | 6.36  | 0       | 10    | 2.971    | 4       | 100   | 2971          | 30.37%  | 89.09% |
| 1r3e     | 0.66       | 6.89  | 0       | 10    | 3.356    | 10      | 100   | 3356          | 40.54%  | 90.50% |
| 1r9f     | 1.55       | 3.19  | 10      | 10    | 9.359    | 99      | 100   | 9359          | 38.47%  | 87.11% |
| 1sds     | 0.80       | 1.51  | 5       | 6     | 4.183    | 41      | 37    | 4183          | 55.21%  | 58.58% |
| 1ser     | 0.10       | 4.35  | 0       | 9     | 2.999    | 0       | 95    | 2999          | 29.18%  | 95.64% |
| 1si3     | 0.27       | 4.66  | 0       | 10    | 7.681    | 0       | 100   | 7681          | 7.99%   | 75.39% |
| 1t0k     | 1.53       | 1.34  | 8       | 0     | 3.725    | 59      | 14    | 3725          | 55.28%  | 51.03% |
| 1tfw     | 0.02       | 4.38  | 0       | 10    | 0.225    | 0       | 97    | 225           | 22.32%  | 99.91% |
| 1u0b     | 0.02       | 6.33  | 0       | 10    | 2.616    | 0       | 97    | 2616          | 21.30%  | 87.02% |
| 1un6     | 0.66       | 2.93  | 0       | 9     | 3.952    | 1       | 93    | 3952          | 29.64%  | 83.37% |
| 1uvj     | 0.51       | 3.20  | 0       | 6     | 2.066    | 0       | 73    | 2066          | 31.46%  | 79.98% |
| 1vfg     | 2.96       | 0.32  | 9       | 10    | 9.313    | 87      | 99    | 9313          | 41.66%  | 73.83% |
| 1wpu     | 2.16       | 3.48  | 10      | 10    | 8.746    | 78      | 100   | 8746          | 51.50%  | 62.11% |
| 1wsu     | 0.50       | 1.72  | 0       | 2     | 4.816    | 14      | 32    | 4816          | 36.42%  | 52.40% |
| 1wz2     | 0.25       | 5.18  | 0       | 10    | 2.451    | 0       | 98    | 2451          | 31.08%  | 79.24% |

|      |      |      |    |    |       |    |     |      |        |         |
|------|------|------|----|----|-------|----|-----|------|--------|---------|
| 1yvp | 2.26 | 2.69 | 8  | 10 | 9.384 | 84 | 100 | 9384 | 37.24% | 84.41%  |
| 1zbh | 0.15 | 1.74 | 2  | 8  | 3.809 | 4  | 69  | 3809 | 34.27% | 67.79%  |
| 2a8v | 0.14 | 2.20 | 2  | 8  | 4.775 | 14 | 84  | 4775 | 33.93% | 53.05%  |
| 2anr | 0.55 | 2.06 | 7  | 0  | 2.927 | 23 | 18  | 2927 | 38.11% | 57.12%  |
| 2asb | 1.18 | 5.26 | 2  | 10 | 5.475 | 3  | 100 | 5475 | 45.69% | 92.22%  |
| 2az0 | 0.22 | 4.33 | 0  | 10 | 1.351 | 1  | 77  | 1351 | 39.63% | 84.06%  |
| 2azx | 0.13 | 2.29 | 0  | 9  | 7.220 | 10 | 90  | 7220 | 28.63% | 63.42%  |
| 2b3j | 1.57 | 3.18 | 0  | 10 | 7.172 | 7  | 100 | 7172 | 24.43% | 92.68%  |
| 2bgg | 0.30 | 4.89 | 0  | 10 | 5.420 | 4  | 100 | 5420 | 27.60% | 87.89%  |
| 2bh2 | 0.29 | 7.08 | 0  | 10 | 2.340 | 0  | 100 | 2340 | 32.26% | 88.99%  |
| 2bte | 0.98 | 2.15 | 7  | 10 | 7.251 | 76 | 98  | 7251 | 42.13% | 81.78%  |
| 2bu1 | 0.18 | 2.41 | 5  | 3  | 3.909 | 17 | 54  | 3909 | 38.21% | 60.05%  |
| 2bx2 | 0.07 | 2.08 | 0  | 5  | 3.441 | 0  | 42  | 3441 | 36.48% | 81.18%  |
| 2ct8 | 0.68 | 3.09 | 3  | 10 | 5.817 | 37 | 87  | 5817 | 35.47% | 79.30%  |
| 2czj | 3.12 | 3.51 | 10 | 10 | 9.135 | 94 | 100 | 9135 | 51.17% | 77.64%  |
| 2d6f | 2.30 | 2.75 | 10 | 10 | 8.458 | 81 | 96  | 8458 | 62.86% | 66.99%  |
| 2der | 0.88 | 4.52 | 0  | 10 | 3.535 | 0  | 100 | 3535 | 26.04% | 96.07%  |
| 2du3 | 2.14 | 2.11 | 9  | 6  | 9.160 | 65 | 84  | 9160 | 47.78% | 51.75%  |
| 2e9t | 0.00 | 7.70 | 0  | 10 | 1.688 | 0  | 100 | 1688 | 19.00% | 99.80%  |
| 2f8k | 1.37 | 1.47 | 9  | 1  | 4.993 | 78 | 32  | 4993 | 50.85% | 56.92%  |
| 2f8s | 1.27 | 2.19 | 6  | 10 | 6.802 | 53 | 100 | 6802 | 40.24% | 66.73%  |
| 2fk6 | 0.84 | 2.93 | 10 | 10 | 8.170 | 78 | 98  | 8170 | 46.25% | 85.70%  |
| 2fmt | 0.59 | 5.99 | 0  | 10 | 2.675 | 10 | 100 | 2675 | 39.56% | 89.93%  |
| 2gic | 1.11 | 3.06 | 0  | 8  | 3.956 | 0  | 87  | 3956 | 37.72% | 91.87%  |
| 2gje | 1.11 | 2.60 | 6  | 9  | 7.233 | 74 | 95  | 7233 | 30.27% | 82.87%  |
| 2gjw | 0.11 | 4.25 | 8  | 10 | 7.806 | 28 | 100 | 7806 | 21.62% | 89.19%  |
| 2gtt | 1.03 | 3.38 | 0  | 9  | 2.419 | 0  | 88  | 2419 | 43.48% | 87.67%  |
| 2gxb | 0.54 | 1.87 | 0  | 3  | 4.715 | 16 | 45  | 4715 | 49.49% | 59.28%  |
| 2hw8 | 1.89 | 3.72 | 9  | 10 | 7.302 | 23 | 99  | 7302 | 52.29% | 92.75%  |
| 2i82 | 3.45 | 7.14 | 6  | 10 | 6.908 | 60 | 100 | 6908 | 40.69% | 84.12%  |
| 2iy5 | 0.07 | 6.69 | 0  | 4  | 0.920 | 0  | 79  | 920  | 30.81% | 95.72%  |
| 2jlv | 0.53 | 0.74 | 0  | 1  | 4.519 | 0  | 13  | 4519 | 33.33% | 81.37%  |
| 2nqp | 0.74 | 3.02 | 0  | 5  | 2.642 | 5  | 58  | 2642 | 43.36% | 74.03%  |
| 2nug | 0.29 | 6.56 | 0  | 10 | 0.365 | 0  | 100 | 365  | 66.33% | 100.00% |
| 2ozb | 1.10 | 6.82 | 1  | 10 | 3.716 | 3  | 100 | 3716 | 37.17% | 84.30%  |
| 2pjp | 0.01 | 1.75 | 1  | 1  | 2.983 | 1  | 33  | 2983 | 31.18% | 59.71%  |
| 2po1 | 1.98 | 1.35 | 10 | 10 | 9.139 | 97 | 100 | 9139 | 44.74% | 75.15%  |
| 2qux | 0.16 | 3.18 | 1  | 4  | 1.940 | 1  | 56  | 1940 | 39.84% | 70.33%  |
| 2r7r | 0.03 | 4.54 | 0  | 10 | 4.231 | 0  | 98  | 4231 | 17.52% | 90.99%  |
| 2r8s | 1.35 | 1.96 | 8  | 10 | 7.263 | 42 | 90  | 7263 | 45.88% | 58.69%  |
| 2vnu | 0.09 | 2.20 | 0  | 2  | 2.481 | 0  | 58  | 2481 | 24.02% | 92.64%  |
| 2voo | 0.08 | 1.69 | 10 | 10 | 7.556 | 96 | 100 | 7556 | 42.96% | 84.91%  |
| 2w2h | 0.50 | 3.96 | 2  | 10 | 5.472 | 20 | 99  | 5472 | 35.93% | 81.34%  |
| 2wj8 | 0.06 | 6.11 | 0  | 10 | 2.429 | 0  | 99  | 2429 | 21.94% | 91.47%  |
| 2z2q | 0.49 | 2.64 | 3  | 9  | 5.908 | 26 | 89  | 5908 | 41.04% | 60.01%  |
| 2zi0 | 3.01 | 0.48 | 0  | 9  | 7.917 | 10 | 88  | 7917 | 26.80% | 79.77%  |
| 2zko | 1.15 | 4.04 | 0  | 7  | 1.338 | 9  | 83  | 1338 | 56.67% | 82.85%  |
| 2zni | 0.30 | 6.44 | 0  | 10 | 2.671 | 0  | 100 | 2671 | 39.96% | 75.52%  |
| 2zue | 0.30 | 4.53 | 0  | 10 | 4.929 | 0  | 99  | 4929 | 22.06% | 89.45%  |
| 2zzm | 0.11 | 8.06 | 0  | 10 | 1.256 | 0  | 100 | 1256 | 17.74% | 93.10%  |

|      |      |      |   |    |       |    |     |      |        |        |
|------|------|------|---|----|-------|----|-----|------|--------|--------|
| 3a6p | 6.30 | 7.17 | 0 | 7  | 1.972 | 54 | 96  | 1972 | 80.50% | 98.57% |
| 3bso | 0.94 | 5.84 | 0 | 10 | 2.472 | 1  | 100 | 2472 | 43.48% | 99.16% |
| 3bt7 | 0.57 | 4.98 | 1 | 10 | 5.376 | 20 | 100 | 5376 | 32.53% | 78.92% |
| 3ciy | 1.71 | 2.79 | 4 | 10 | 5.629 | 44 | 82  | 5629 | 59.08% | 68.67% |
| 3d2s | 0.04 | 0.79 | 6 | 10 | 8.929 | 62 | 97  | 8929 | 31.56% | 71.09% |
| 3dd2 | 0.74 | 2.00 | 0 | 3  | 2.468 | 4  | 43  | 2468 | 44.36% | 65.72% |
| 3egz | 1.05 | 3.05 | 6 | 10 | 5.223 | 6  | 97  | 5223 | 16.40% | 78.69% |
| 3eph | 0.19 | 8.81 | 0 | 10 | 1.002 | 0  | 100 | 1002 | 13.09% | 99.27% |
| 3eqt | 0.40 | 7.19 | 2 | 10 | 5.188 | 54 | 100 | 5188 | 38.30% | 94.21% |
| 3ex7 | 0.05 | 4.06 | 0 | 10 | 7.516 | 0  | 96  | 7516 | 17.89% | 74.52% |
| 3fht | 2.19 | 3.66 | 0 | 10 | 8.250 | 0  | 100 | 8250 | 17.70% | 84.03% |
| 3foz | 0.48 | 8.00 | 0 | 10 | 1.341 | 0  | 100 | 1341 | 21.01% | 98.21% |
| 3gib | 0.37 | 1.80 | 0 | 6  | 2.324 | 0  | 48  | 2324 | 30.84% | 48.98% |
| 3hax | 0.04 | 6.51 | 1 | 10 | 1.027 | 1  | 100 | 1027 | 19.17% | 87.71% |
| 3hl2 | 2.67 | 3.66 | 0 | 10 | 9.062 | 56 | 100 | 9062 | 47.50% | 98.70% |
| 3htx | 0.02 | 8.04 | 0 | 10 | 1.045 | 0  | 100 | 1045 | 22.19% | 95.66% |
| 3i5x | 0.31 | 3.55 | 0 | 10 | 6.791 | 4  | 100 | 6791 | 35.47% | 79.65% |
| 3iab | 0.59 | 5.28 | 0 | 10 | 4.770 | 7  | 92  | 4770 | 23.74% | 73.43% |
| 3icq | 0.14 | 2.83 | 0 | 10 | 5.140 | 10 | 88  | 5140 | 34.96% | 80.57% |
| 3iev | 1.30 | 5.64 | 8 | 10 | 7.914 | 67 | 100 | 7914 | 60.50% | 65.06% |
| 3k62 | 2.51 | 3.40 | 9 | 10 | 8.482 | 86 | 100 | 8482 | 35.14% | 77.82% |
| 3l25 | 0.35 | 7.02 | 0 | 7  | 1.205 | 0  | 79  | 1205 | 38.48% | 98.58% |
| 3snp | 0.02 | 6.63 | 1 | 10 | 3.201 | 1  | 100 | 3201 | 25.46% | 83.77% |
