# Supplementary material for: Protein-RNA Complexes and Efficient Automatic Docking: Expanding RosettaDock Possibilities
Source: PubMed Central journal article supplement (PMC4182525; doi:10.1371/journal.pone.0108928), 2014-09-30
Supplement: pone.0108928.s009.pdf [file pone.0108928.s009.pdf]

| PDB code | Enrichment score |       | Top10   |       |          | Top100  |       | # near native | AUC     |       |
|----------|------------------|-------|---------|-------|----------|---------|-------|---------------|---------|-------|
|          | Default          | Roger | Default | Roger | Expected | Default | Roger |               | Default | Roger |
| 1b7f     | 0.47             | 5.15  | 1       | 10    | 3.579    | 1       | 100   | 3579          | 0.32    | 0.89  |
| 1c9s     | 0.9              | 1.19  | 6       | 7     | 5.905    | 25      | 81    | 5905          | 0.37    | 0.69  |
| 1dk1     | 2.32             | 2.58  | 9       | 8     | 7.66     | 89      | 97    | 7660          | 0.61    | 0.82  |
| 1e7k     | 0.67             | 1.33  | 2       | 1     | 3.359    | 11      | 16    | 3359          | 0.50    | 0.53  |
| 1ec6     | 0.31             | 0.88  | 1       | 0     | 1.73     | 3       | 14    | 1730          | 0.44    | 0.60  |
| 1efw     | 0.41             | 2.9   | 0       | 10    | 6.366    | 0       | 96    | 6366          | 0.33    | 0.79  |
| 1ekz     | 0.95             | 0.81  | 4       | 1     | 1.768    | 18      | 20    | 1768          | 0.52    | 0.52  |
| 1g1x     | 3.32             | 0.54  | 2       | 6     | 8.764    | 85      | 82    | 8764          | 0.59    | 0.51  |
| 1hc8     | 1.56             | 3.63  | 10      | 10    | 9.433    | 94      | 100   | 9433          | 0.49    | 0.79  |
| 1hvu     | 0.77             | 1.93  | 2       | 2     | 4.366    | 42      | 48    | 4366          | 0.50    | 0.70  |
| 1jbr     | 3.56             | 0.02  | 9       | 9     | 9.229    | 71      | 86    | 9229          | 0.45    | 0.65  |
| 1kog     | 0.95             | 1.14  | 3       | 1     | 1.532    | 11      | 23    | 1532          | 0.49    | 0.54  |
| 1kq2     | 0.09             | 5.4   | 0       | 9     | 2.602    | 0       | 89    | 2602          | 0.31    | 0.74  |
| 1m5o     | 1.06             | 1.33  | 6       | 5     | 4.748    | 6       | 78    | 4748          | 0.24    | 0.83  |
| 1m8w     | 1.79             | 1.27  | 4       | 10    | 8.343    | 80      | 97    | 8343          | 0.37    | 0.74  |
| 1mfq     | 1.36             | 2.35  | 10      | 3     | 7.757    | 91      | 52    | 7757          | 0.62    | 0.59  |
| 1mms     | 2.52             | 3.31  | 10      | 9     | 8.859    | 85      | 96    | 8859          | 0.50    | 0.86  |
| 1msw     | 0.00             | 8.84  | 0       | 10    | 0.841    | 0       | 98    | 841           | 0.08    | 1.00  |
| 1ob2     | 0.78             | 3.38  | 7       | 10    | 4.625    | 12      | 97    | 4625          | 0.41    | 0.83  |
| 1t4l     | 0.56             | 1.64  | 10      | 10    | 7.852    | 98      | 95    | 7852          | 0.52    | 0.61  |
| 1ttt     | 0.76             | 3.25  | 6       | 10    | 4.691    | 11      | 97    | 4691          | 0.39    | 0.78  |
| 1u63     | 3.14             | 1.13  | 7       | 10    | 8.338    | 72      | 100   | 8338          | 0.44    | 0.86  |
| 1wne     | 0.01             | 4.41  | 0       | 7     | 2.213    | 0       | 96    | 2213          | 0.17    | 0.99  |
| 1zbi     | 0.37             | 2.95  | 0       | 8     | 2.231    | 0       | 69    | 2231          | 0.34    | 0.75  |
| 2ad9     | 1.99             | 2.53  | 10      | 10    | 9.179    | 84      | 100   | 9179          | 0.31    | 0.90  |
| 2adb     | 1.03             | 3.37  | 10      | 10    | 9.18     | 75      | 100   | 9180          | 0.25    | 0.89  |
| 2adc     | 3.38             | 2.61  | 3       | 10    | 6.94     | 40      | 100   | 6940          | 0.44    | 0.86  |
| 2b6g     | 1.73             | 0.02  | 9       | 6     | 5.228    | 93      | 62    | 5228          | 0.58    | 0.42  |
| 2c0b     | 0.00             | 2.98  | 0       | 8     | 3.937    | 0       | 91    | 3937          | 0.26    | 0.86  |
| 2dra     | 0.03             | 6.16  | 0       | 8     | 1.419    | 0       | 88    | 1419          | 0.32    | 0.91  |
| 2err     | 1.27             | 2.48  | 8       | 10    | 8.263    | 20      | 100   | 8263          | 0.15    | 0.92  |
| 2ez6     | 1.42             | 2.92  | 10      | 9     | 5.235    | 87      | 67    | 5235          | 0.58    | 0.62  |
| 2hgh     | 0.74             | 1.03  | 0       | 4     | 5.387    | 0       | 69    | 5387          | 0.25    | 0.82  |
| 2i91     | 0.47             | 7.35  | 0       | 10    | 1.726    | 0       | 95    | 1726          | 0.28    | 0.98  |
| 2ix1     | 0.02             | 2.14  | 0       | 4     | 1.795    | 0       | 55    | 1795          | 0.17    | 0.94  |
| 2py9     | 4.28             | 2.95  | 9       | 10    | 8.014    | 89      | 98    | 8014          | 0.50    | 0.83  |
| 3bo2     | 0.66             | 2.73  | 4       | 6     | 3.663    | 4       | 82    | 3663          | 0.31    | 0.80  |
| 3bsb     | 1.6              | 1.55  | 7       | 10    | 8.348    | 81      | 100   | 8348          | 0.36    | 0.80  |
| 3bsx     | 1.6              | 1.2   | 3       | 10    | 8.448    | 83      | 100   | 8448          | 0.32    | 0.82  |
| 3bx2     | 1.83             | 3.09  | 8       | 10    | 8.595    | 75      | 100   | 8595          | 0.33    | 0.84  |
